# Supplementary material (part 2 of 3)
Source: ML conference proceedings conference paper supplement (https://aclanthology.org/2024.findings-eacl.150)

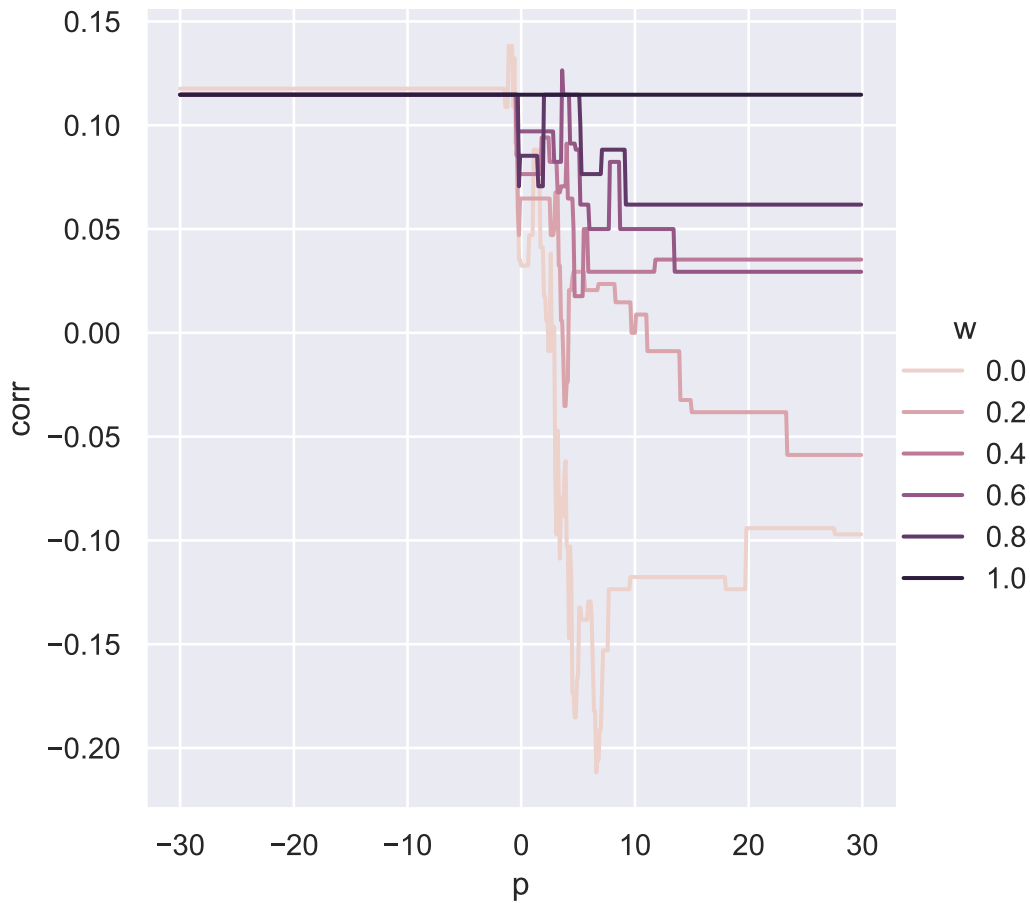

Supplement: note [file SummEval-coherence-spearman__LimeExplainer__Rouge-l__en_train_3.pdf › experiment_graphs_pdf_stratification/SummEval-coherence-spearman__LimeExplainer__Rouge-l__en_train_3.pdf]

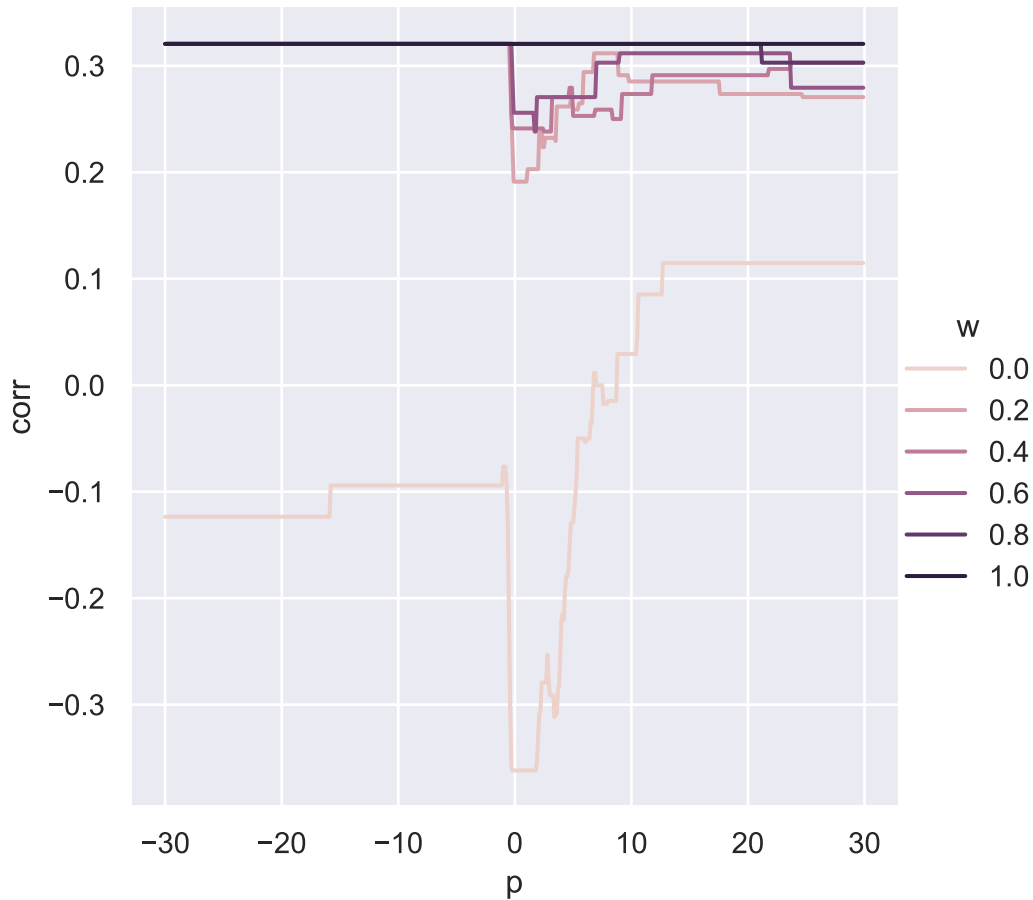

Supplement: note [file SummEval-coherence-spearman__LimeExplainer__Rouge-l__en_train_4.pdf › experiment_graphs_pdf_stratification/SummEval-coherence-spearman__LimeExplainer__Rouge-l__en_train_4.pdf]

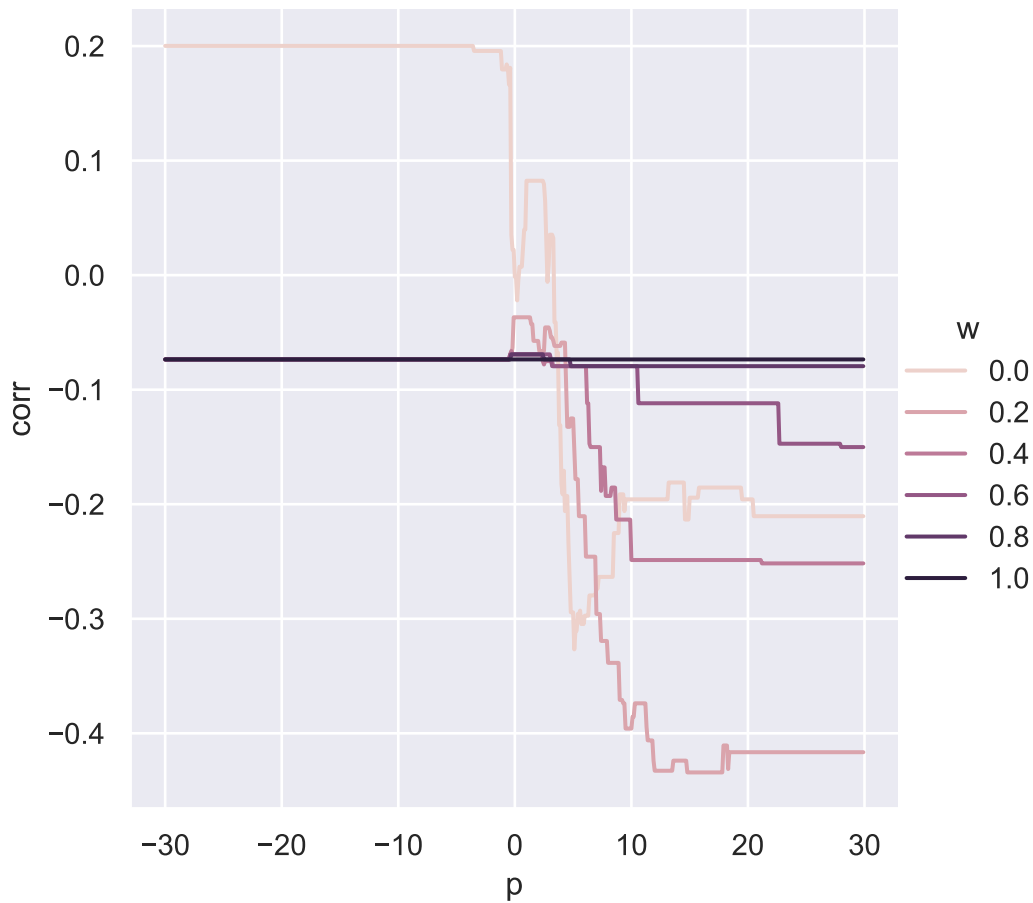

Supplement: note [file SummEval-coherence-spearman__LimeExplainer__Rouge-l__en_train_5.pdf › experiment_graphs_pdf_stratification/SummEval-coherence-spearman__LimeExplainer__Rouge-l__en_train_5.pdf]

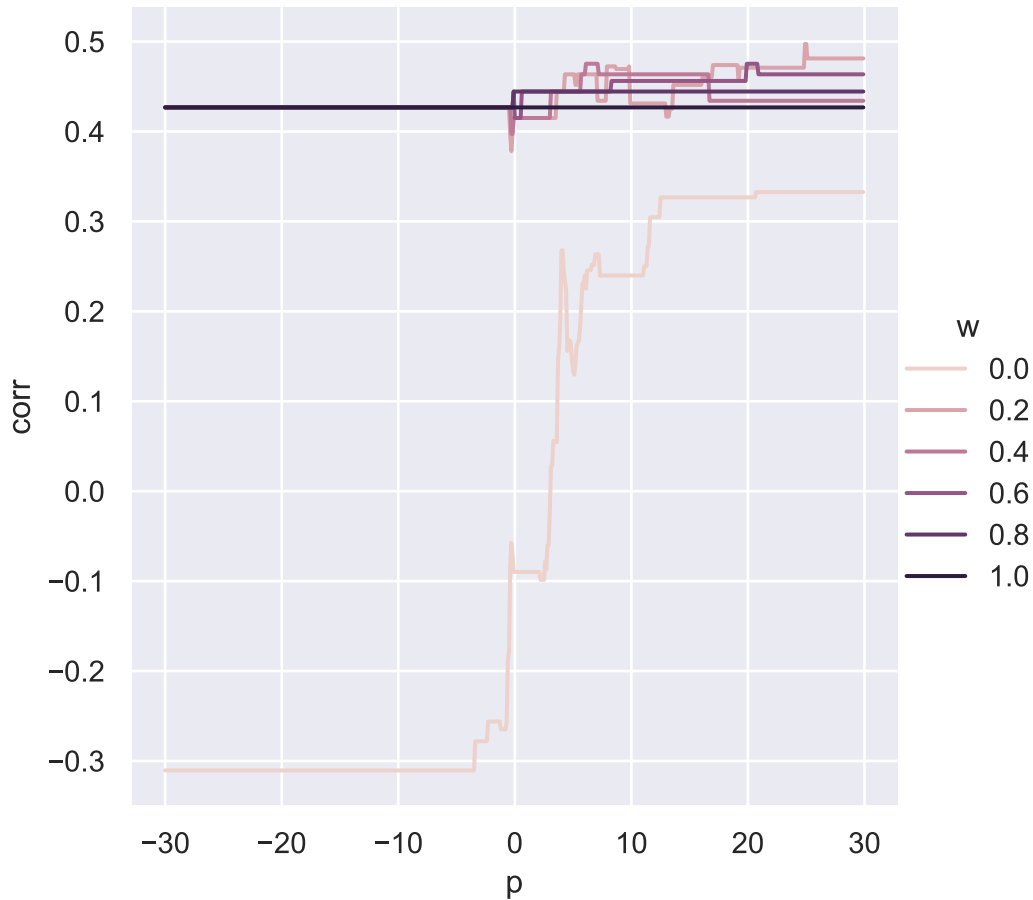

Supplement: note [file SummEval-coherence-spearman__LimeExplainer__Rouge-l__en_train_6.pdf › experiment_graphs_pdf_stratification/SummEval-coherence-spearman__LimeExplainer__Rouge-l__en_train_6.pdf]

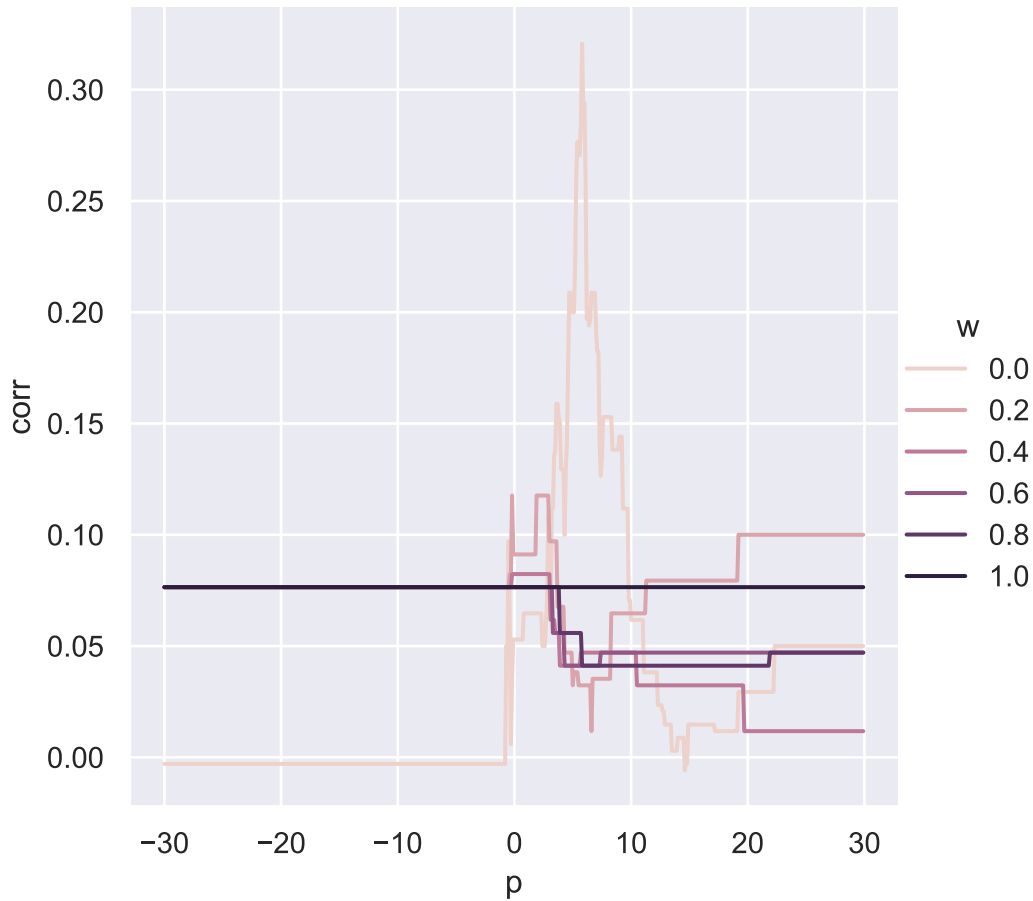

Supplement: note [file SummEval-coherence-spearman__LimeExplainer__Rouge-l__en_train_7.pdf › experiment_graphs_pdf_stratification/SummEval-coherence-spearman__LimeExplainer__Rouge-l__en_train_7.pdf]

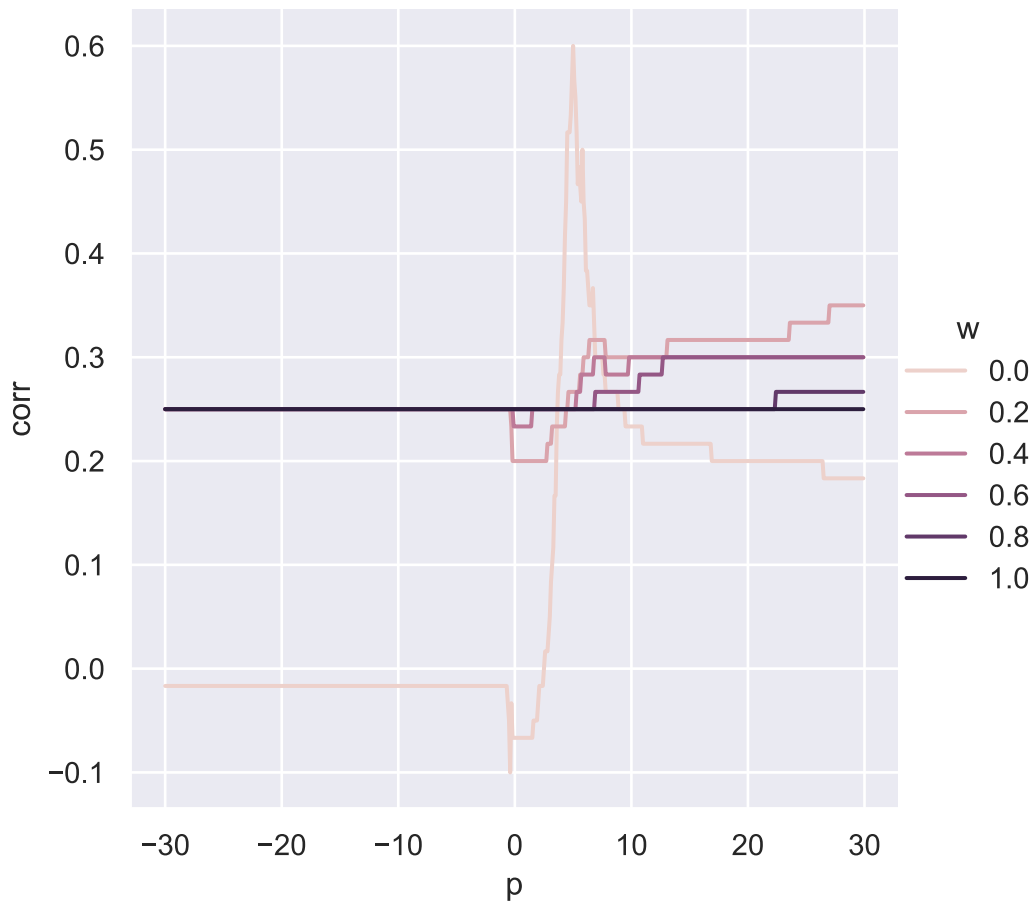

Supplement: note [file SummEval-coherence__LimeExplainer__BARTScore__en_test_0.pdf › experiment_graphs_pdf_stratification/SummEval-coherence__LimeExplainer__BARTScore__en_test_0.pdf]

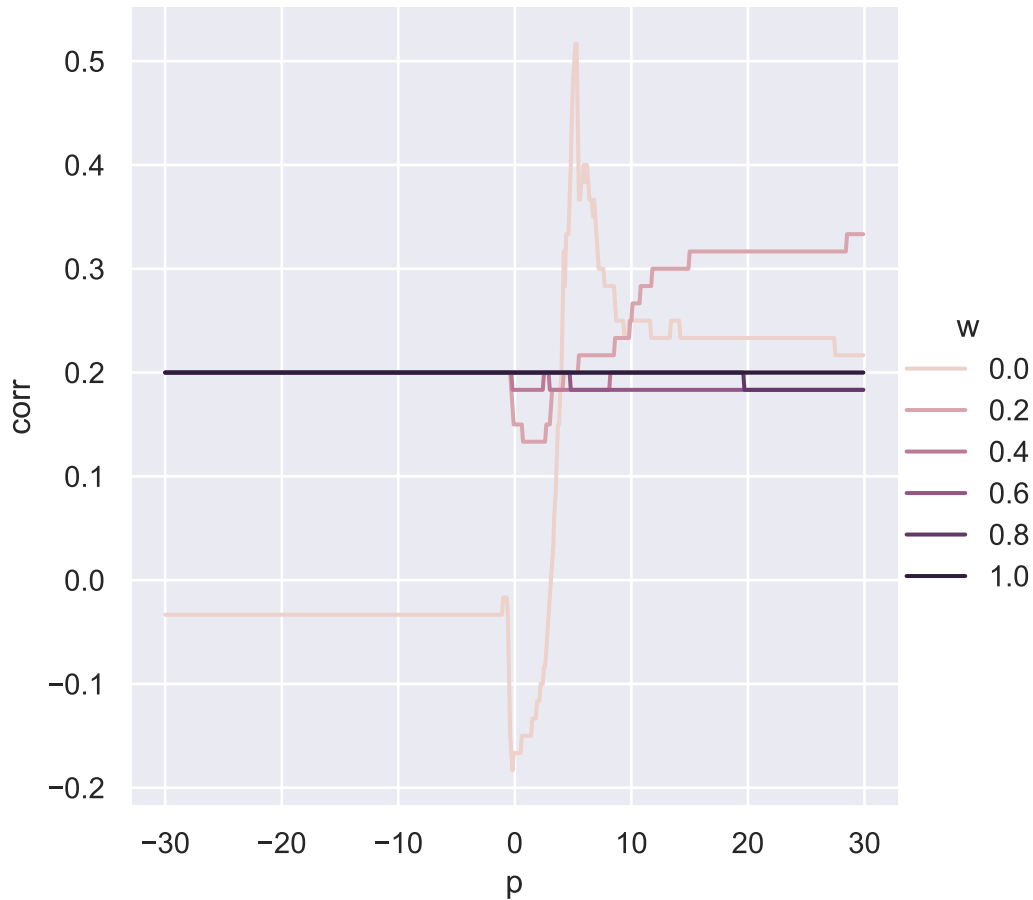

Supplement: note [file SummEval-coherence__LimeExplainer__BARTScore__en_test_1.pdf › experiment_graphs_pdf_stratification/SummEval-coherence__LimeExplainer__BARTScore__en_test_1.pdf]

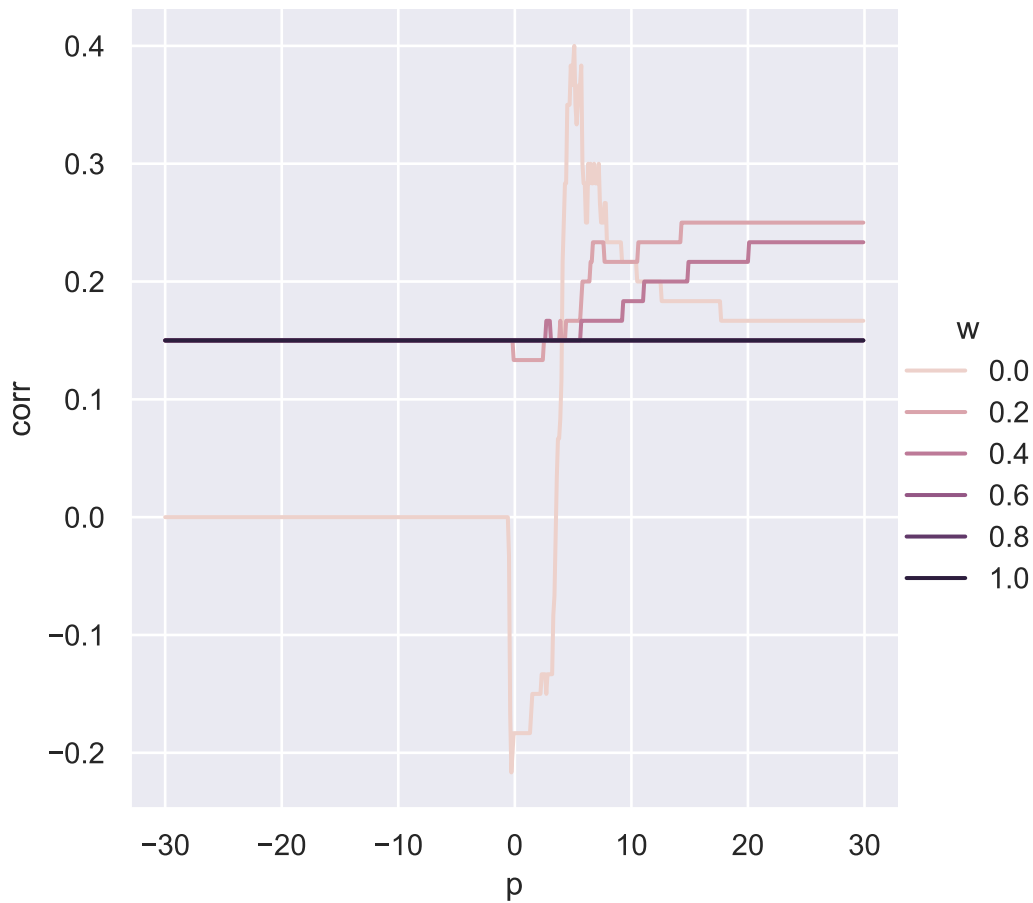

Supplement: note [file SummEval-coherence__LimeExplainer__BARTScore__en_test_2.pdf › experiment_graphs_pdf_stratification/SummEval-coherence__LimeExplainer__BARTScore__en_test_2.pdf]

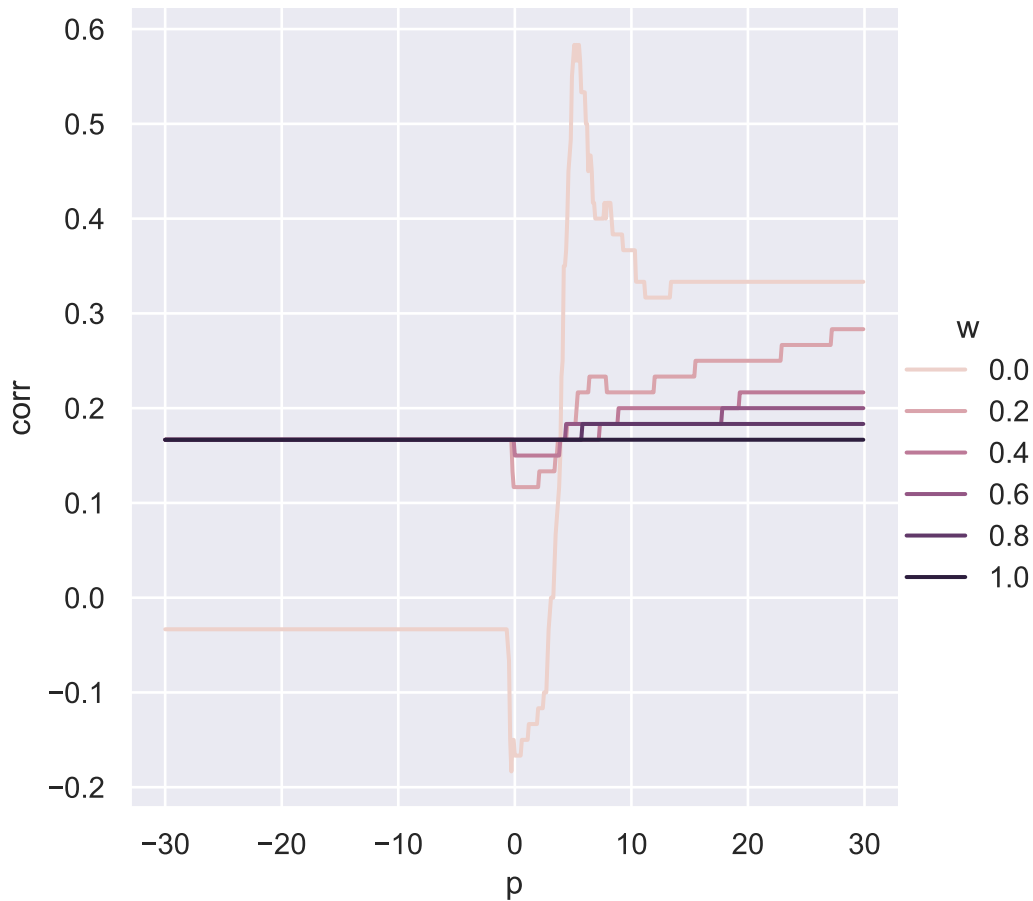

Supplement: note [file SummEval-coherence__LimeExplainer__BARTScore__en_test_3.pdf › experiment_graphs_pdf_stratification/SummEval-coherence__LimeExplainer__BARTScore__en_test_3.pdf]

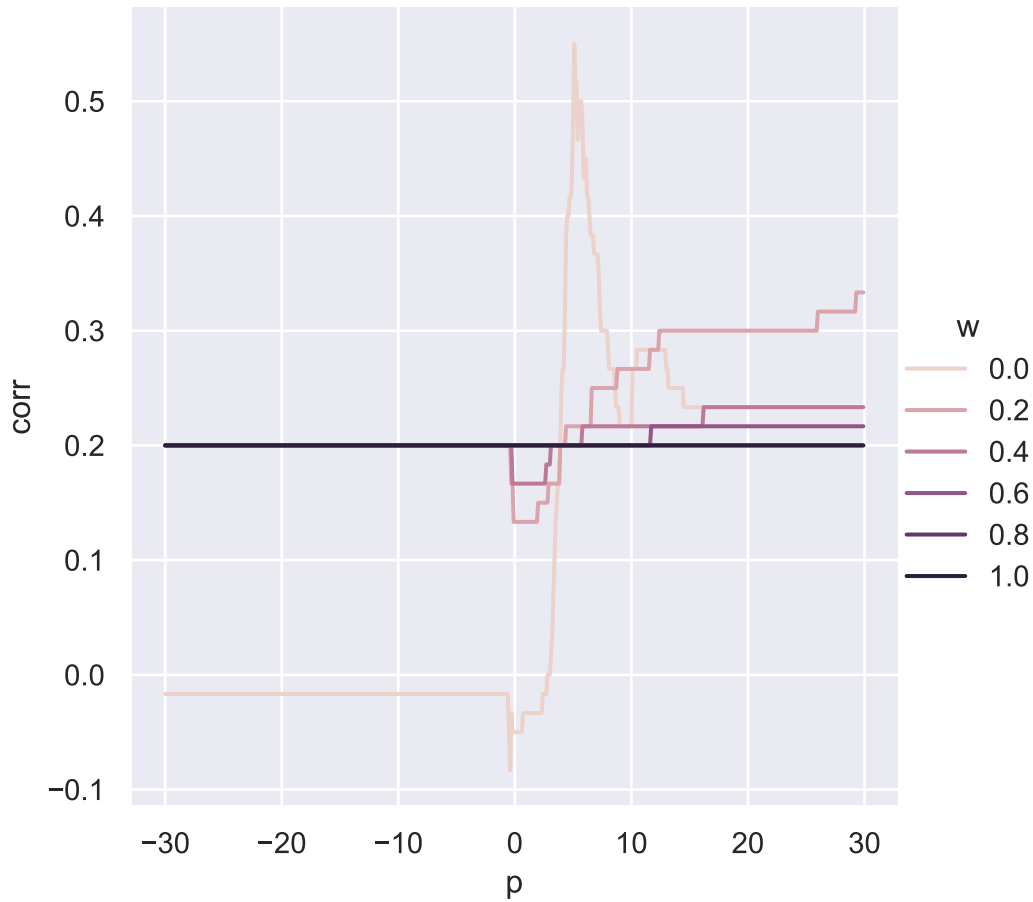

Supplement: note [file SummEval-coherence__LimeExplainer__BARTScore__en_test_4.pdf › experiment_graphs_pdf_stratification/SummEval-coherence__LimeExplainer__BARTScore__en_test_4.pdf]

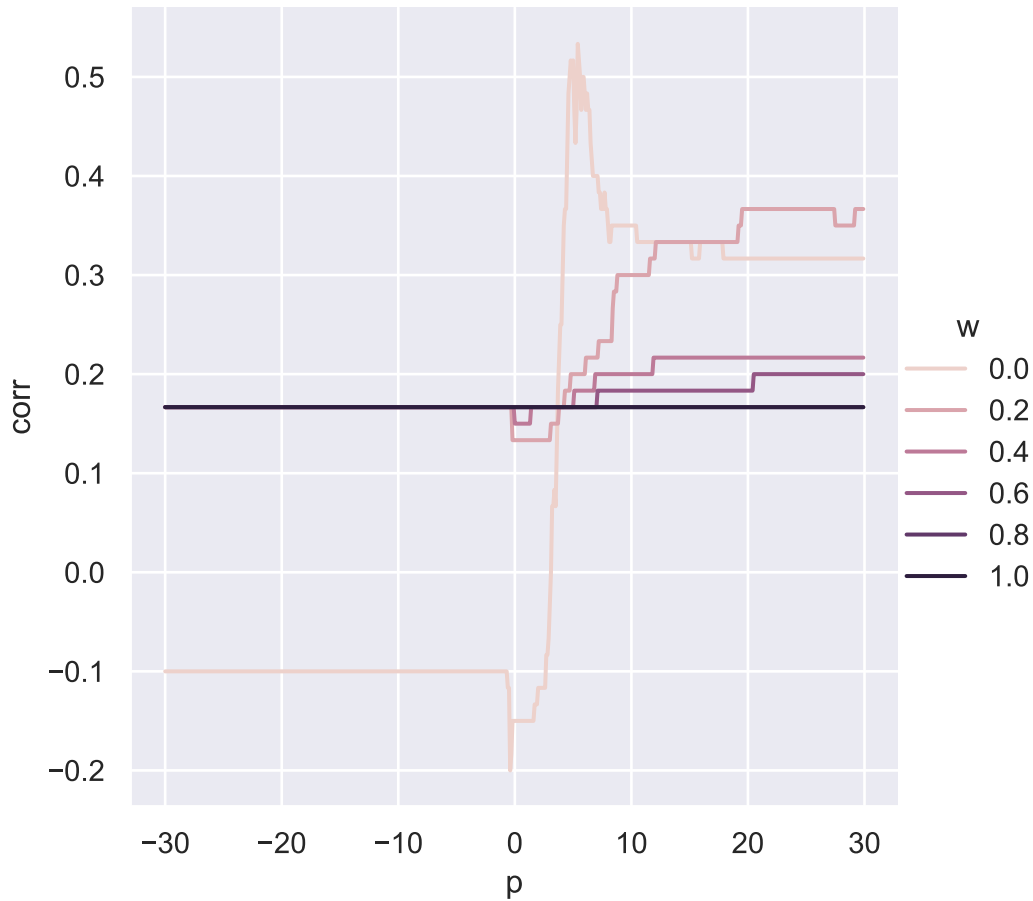

Supplement: note [file SummEval-coherence__LimeExplainer__BARTScore__en_test_5.pdf › experiment_graphs_pdf_stratification/SummEval-coherence__LimeExplainer__BARTScore__en_test_5.pdf]

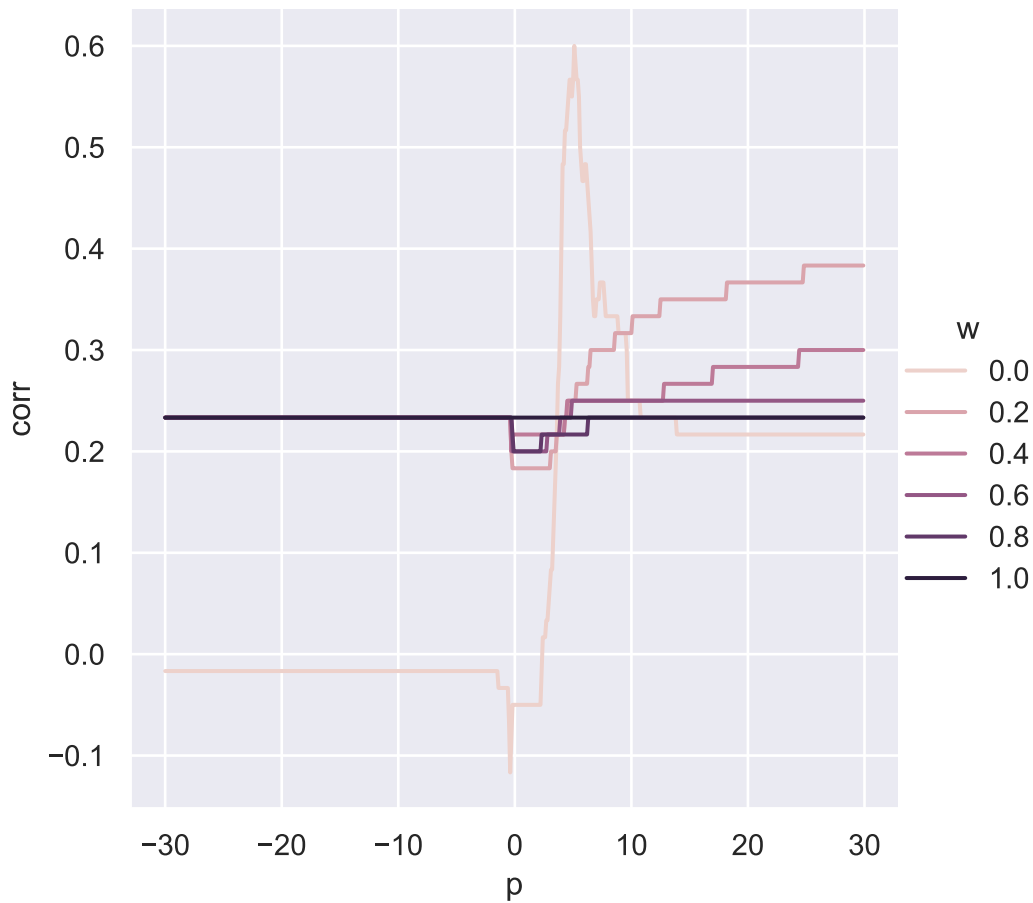

Supplement: note [file SummEval-coherence__LimeExplainer__BARTScore__en_test_6.pdf › experiment_graphs_pdf_stratification/SummEval-coherence__LimeExplainer__BARTScore__en_test_6.pdf]

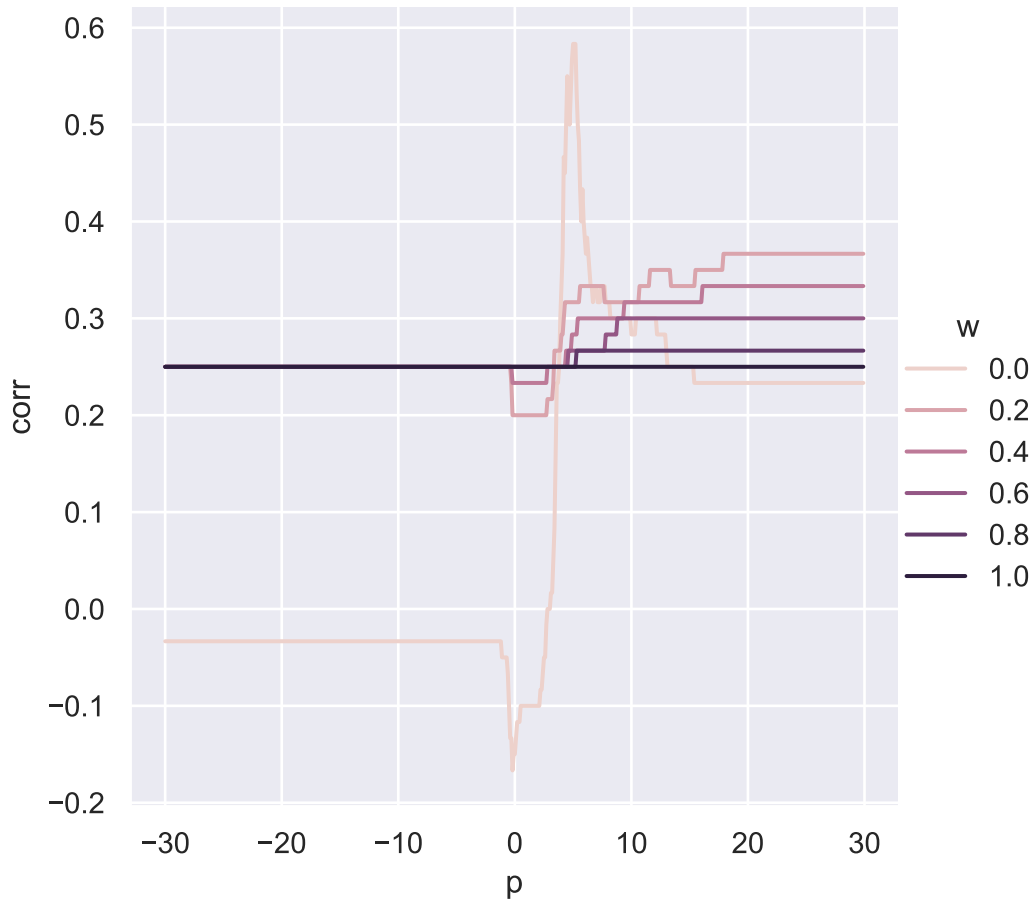

Supplement: note [file SummEval-coherence__LimeExplainer__BARTScore__en_test_7.pdf › experiment_graphs_pdf_stratification/SummEval-coherence__LimeExplainer__BARTScore__en_test_7.pdf]

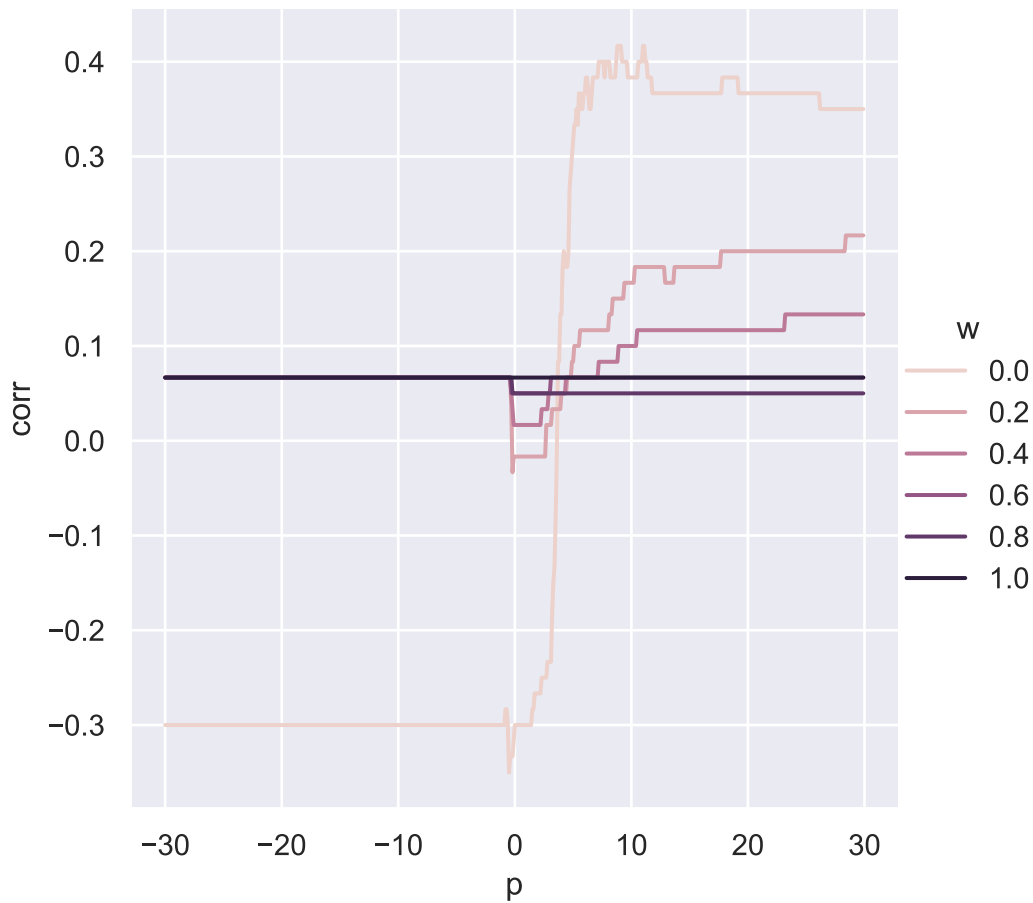

Supplement: note [file SummEval-coherence__LimeExplainer__BARTScore__en_train_0.pdf › experiment_graphs_pdf_stratification/SummEval-coherence__LimeExplainer__BARTScore__en_train_0.pdf]

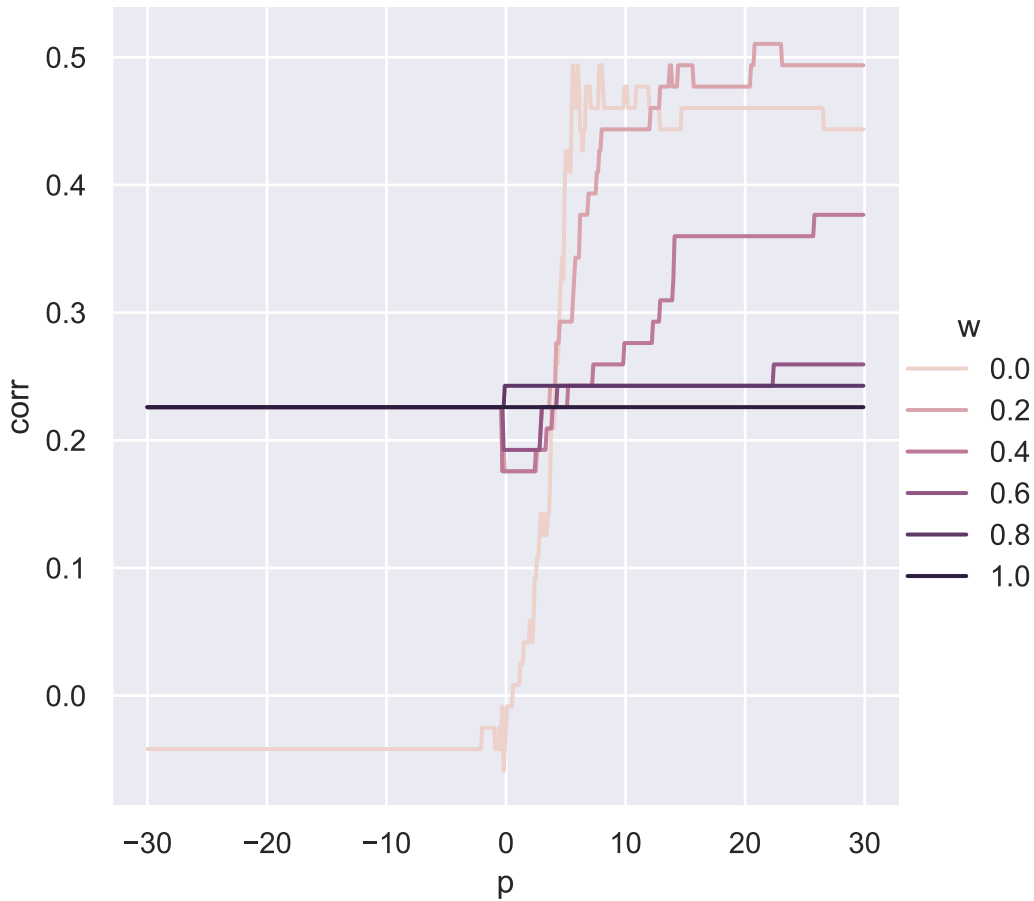

Supplement: note [file SummEval-coherence__LimeExplainer__BARTScore__en_train_1.pdf › experiment_graphs_pdf_stratification/SummEval-coherence__LimeExplainer__BARTScore__en_train_1.pdf]

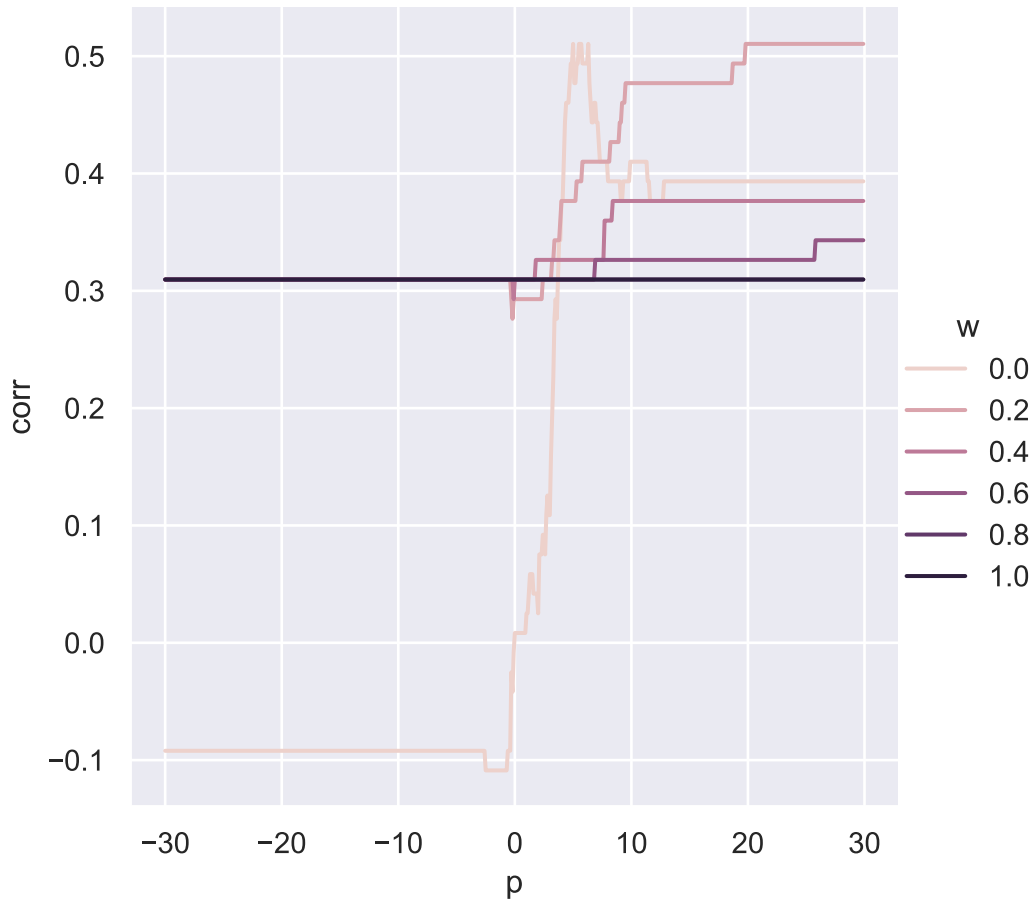

Supplement: note [file SummEval-coherence__LimeExplainer__BARTScore__en_train_2.pdf › experiment_graphs_pdf_stratification/SummEval-coherence__LimeExplainer__BARTScore__en_train_2.pdf]

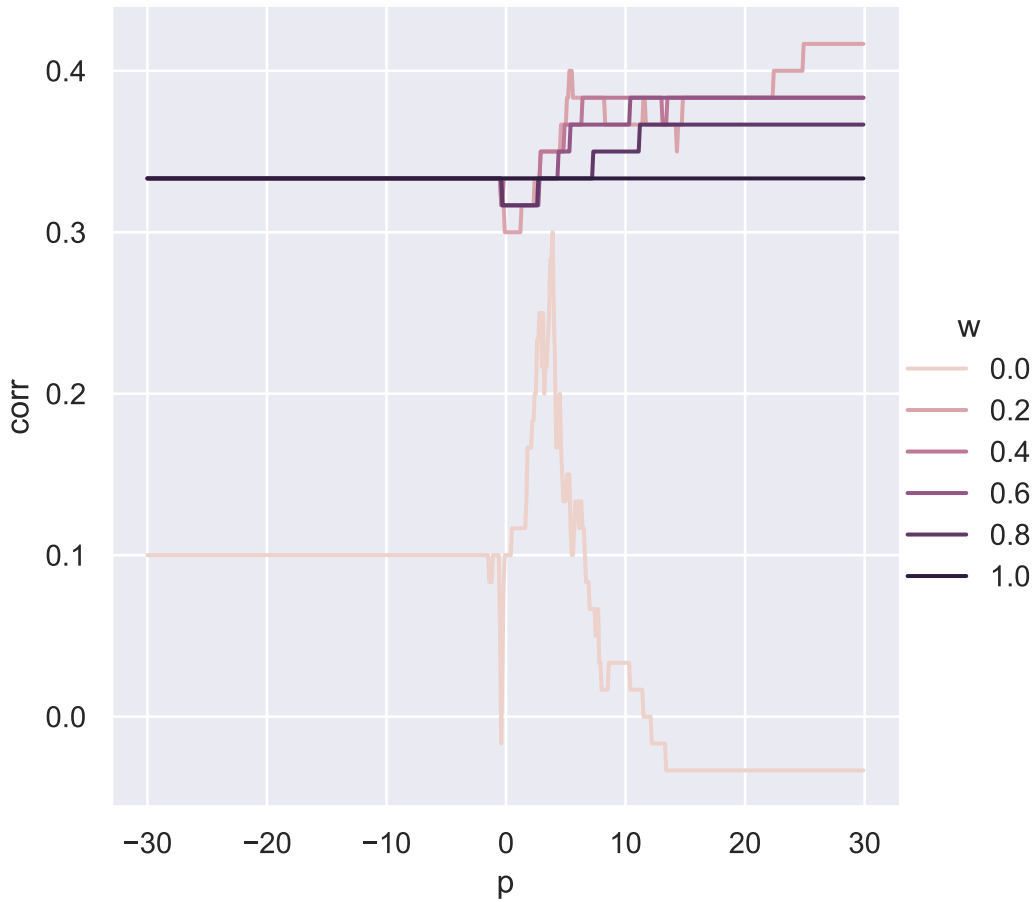

Supplement: note [file SummEval-coherence__LimeExplainer__BARTScore__en_train_3.pdf › experiment_graphs_pdf_stratification/SummEval-coherence__LimeExplainer__BARTScore__en_train_3.pdf]

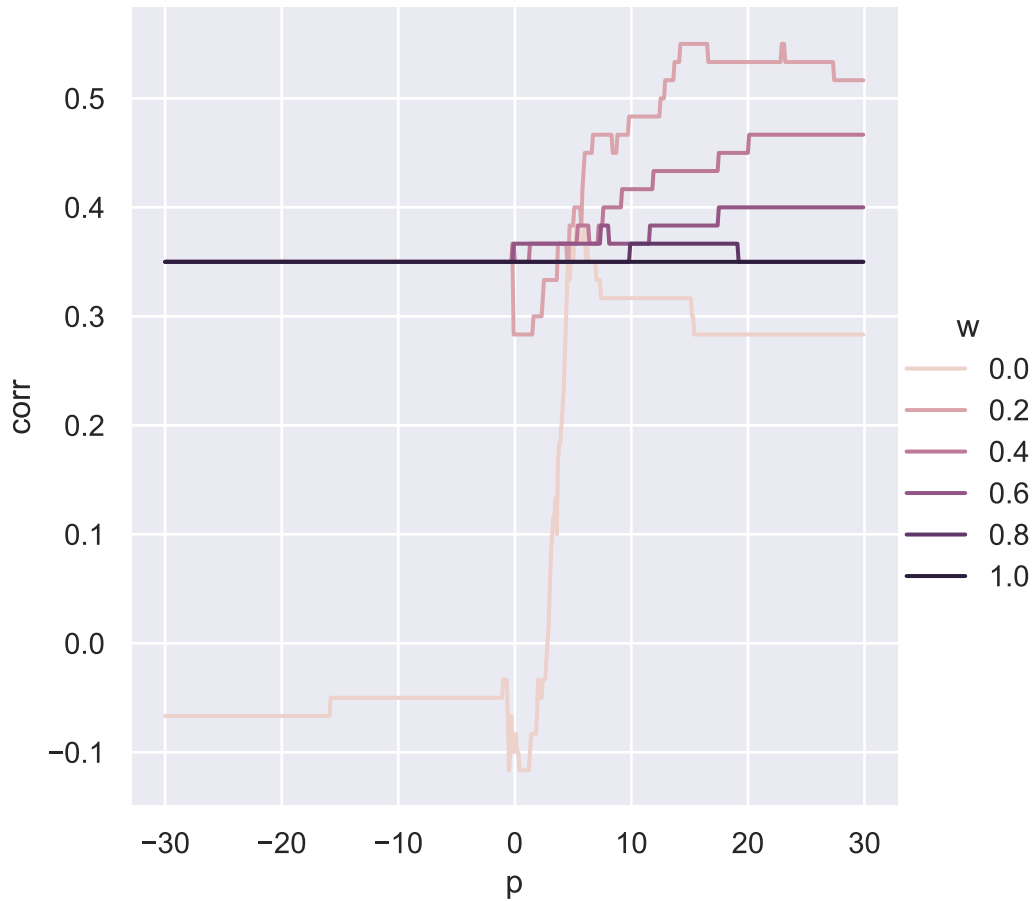

Supplement: note [file SummEval-coherence__LimeExplainer__BARTScore__en_train_4.pdf › experiment_graphs_pdf_stratification/SummEval-coherence__LimeExplainer__BARTScore__en_train_4.pdf]

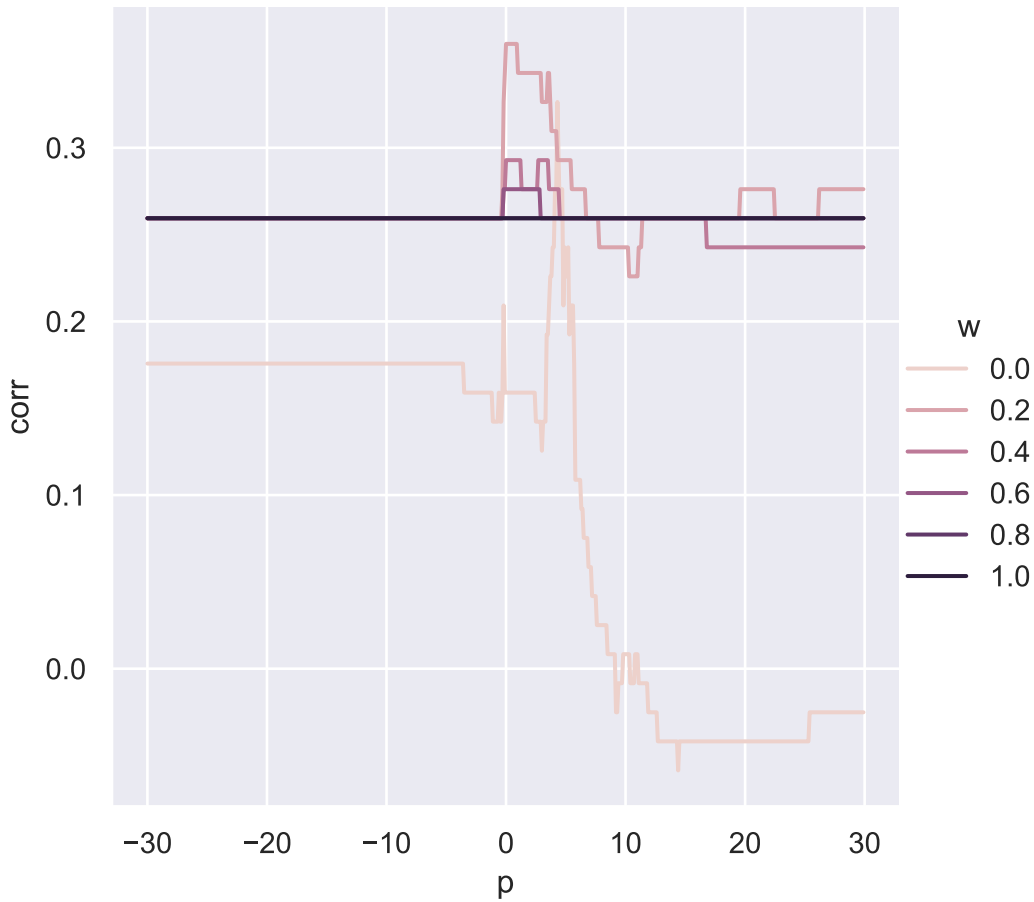

Supplement: note [file SummEval-coherence__LimeExplainer__BARTScore__en_train_5.pdf › experiment_graphs_pdf_stratification/SummEval-coherence__LimeExplainer__BARTScore__en_train_5.pdf]

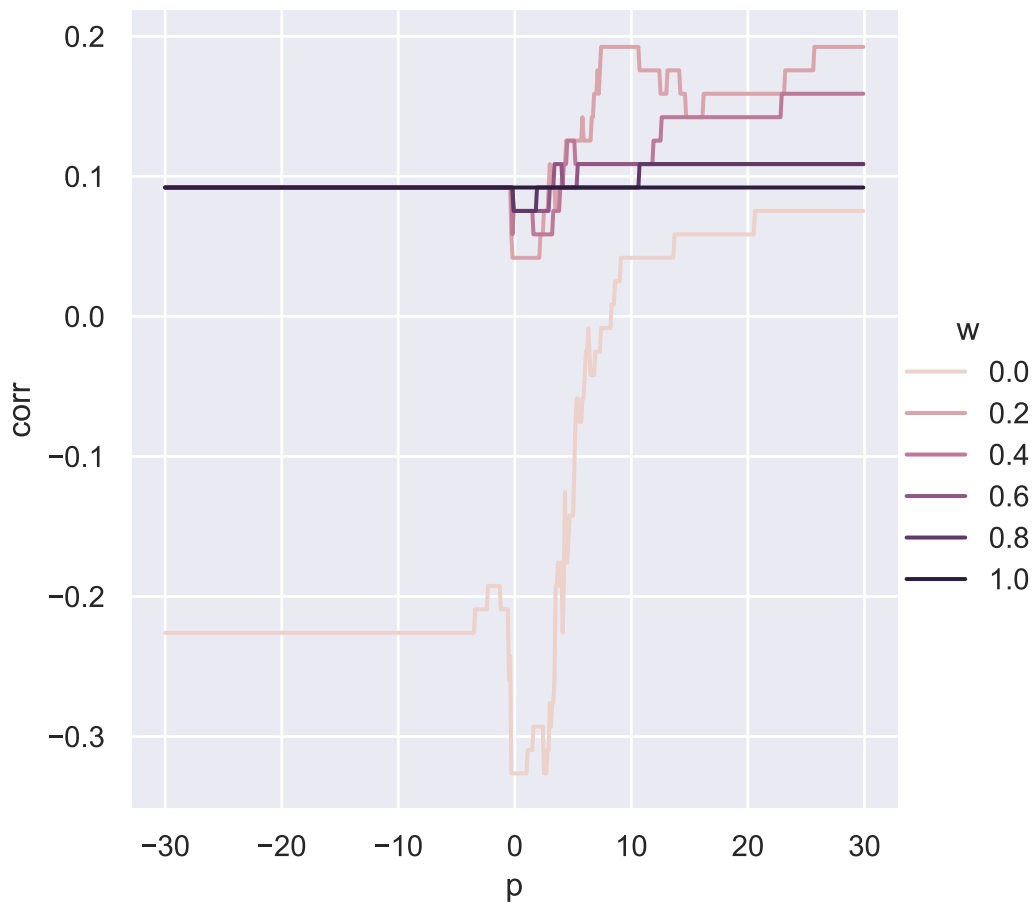

Supplement: note [file SummEval-coherence__LimeExplainer__BARTScore__en_train_6.pdf › experiment_graphs_pdf_stratification/SummEval-coherence__LimeExplainer__BARTScore__en_train_6.pdf]

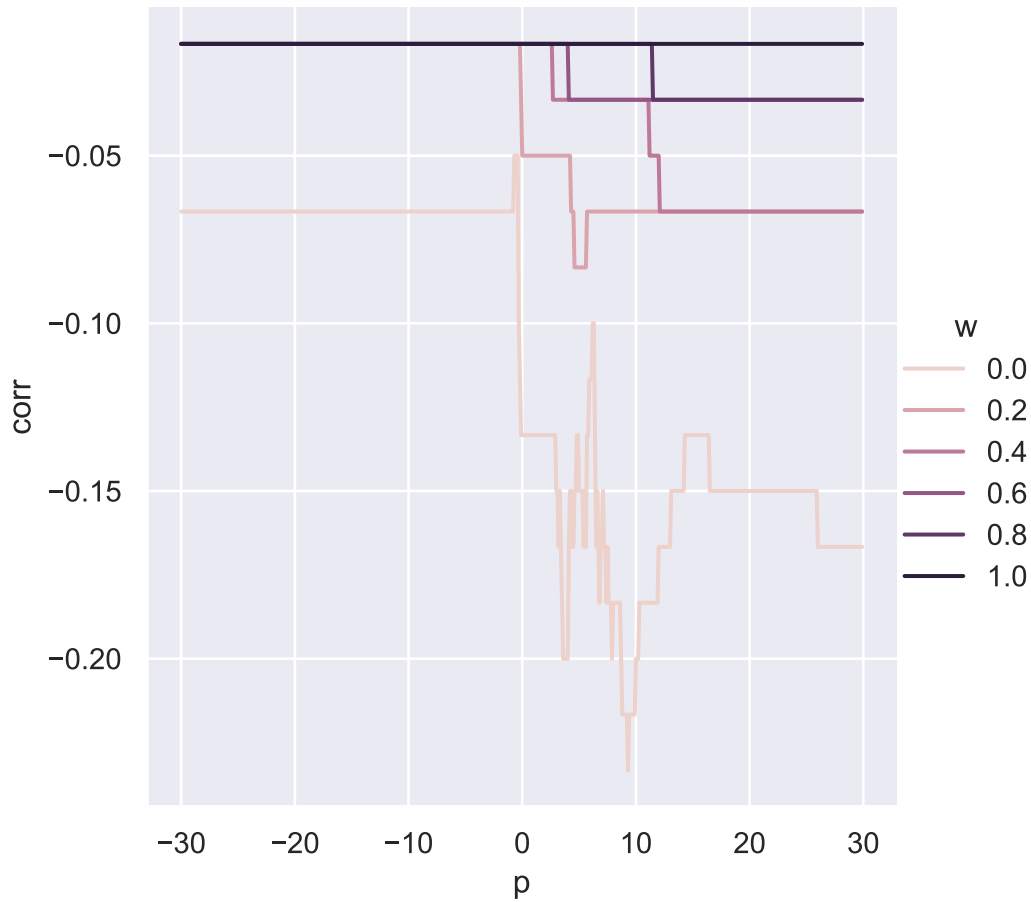

Supplement: note [file SummEval-coherence__LimeExplainer__BARTScore__en_train_7.pdf › experiment_graphs_pdf_stratification/SummEval-coherence__LimeExplainer__BARTScore__en_train_7.pdf]

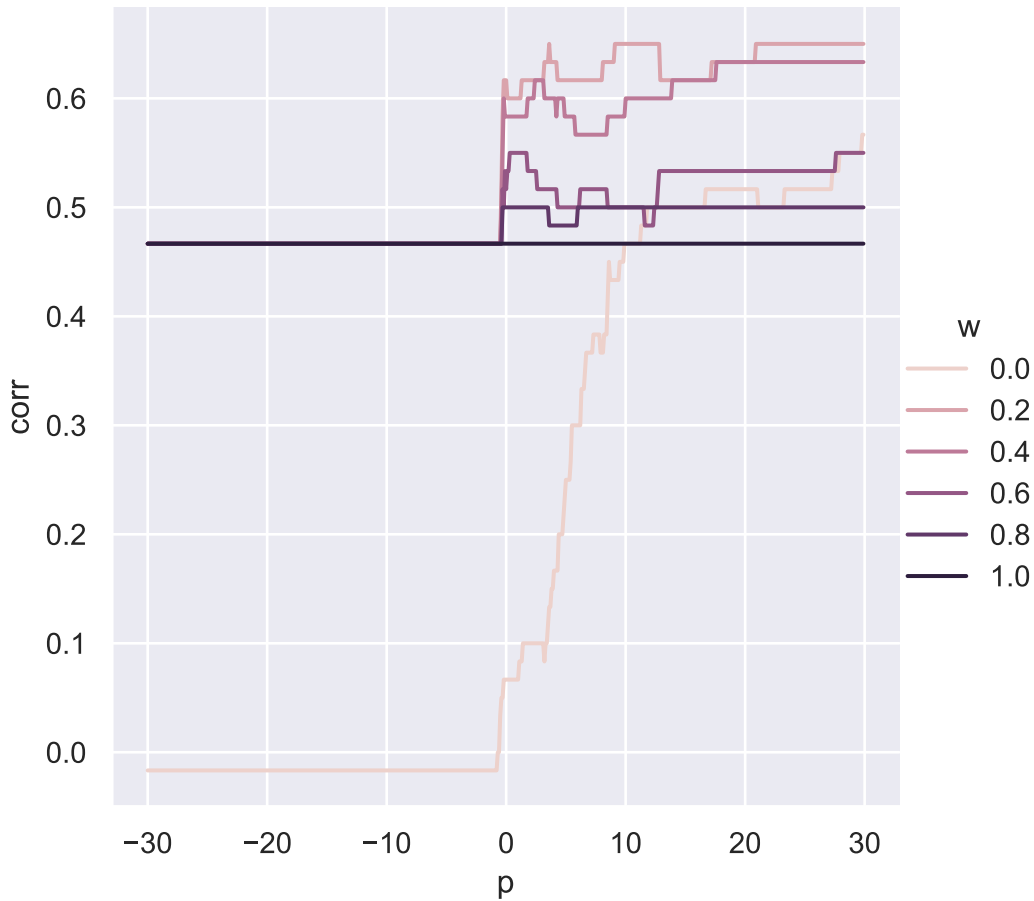

Supplement: note [file SummEval-coherence__LimeExplainer__BERTSCORE_REF_BASED_ROBERTA_DEFAULT__en_test_0.pdf › experiment_graphs_pdf_stratification/SummEval-coherence__LimeExplainer__BERTSCORE_REF_BASED_ROBERTA_DEFAULT__en_test_0.pdf]

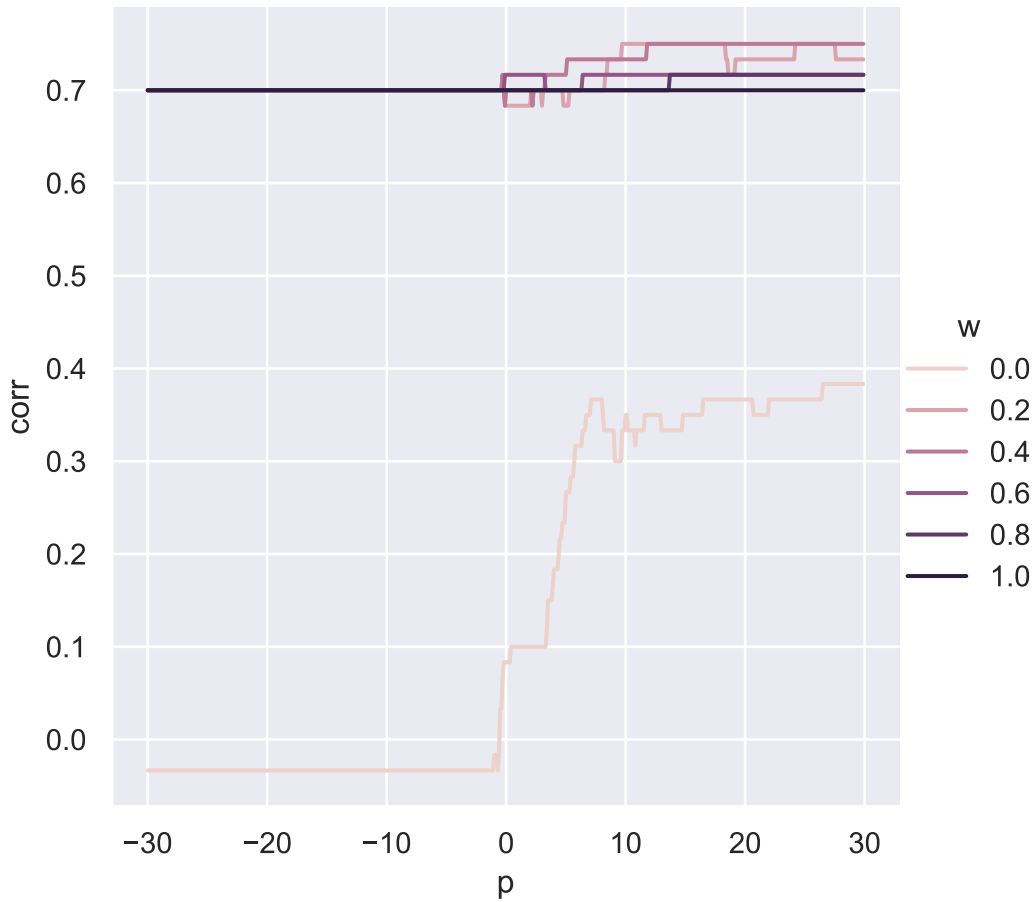

Supplement: note [file SummEval-coherence__LimeExplainer__BERTSCORE_REF_BASED_ROBERTA_DEFAULT__en_test_1.pdf › experiment_graphs_pdf_stratification/SummEval-coherence__LimeExplainer__BERTSCORE_REF_BASED_ROBERTA_DEFAULT__en_test_1.pdf]

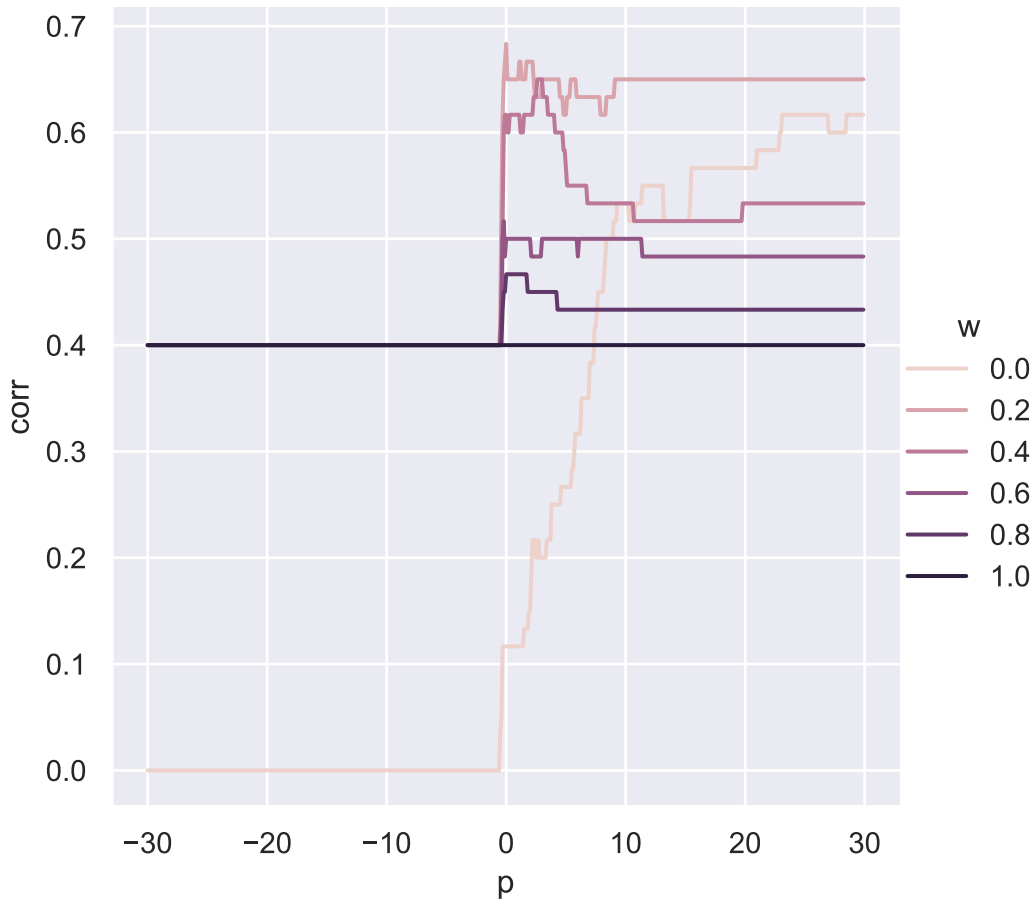

Supplement: note [file SummEval-coherence__LimeExplainer__BERTSCORE_REF_BASED_ROBERTA_DEFAULT__en_test_2.pdf › experiment_graphs_pdf_stratification/SummEval-coherence__LimeExplainer__BERTSCORE_REF_BASED_ROBERTA_DEFAULT__en_test_2.pdf]

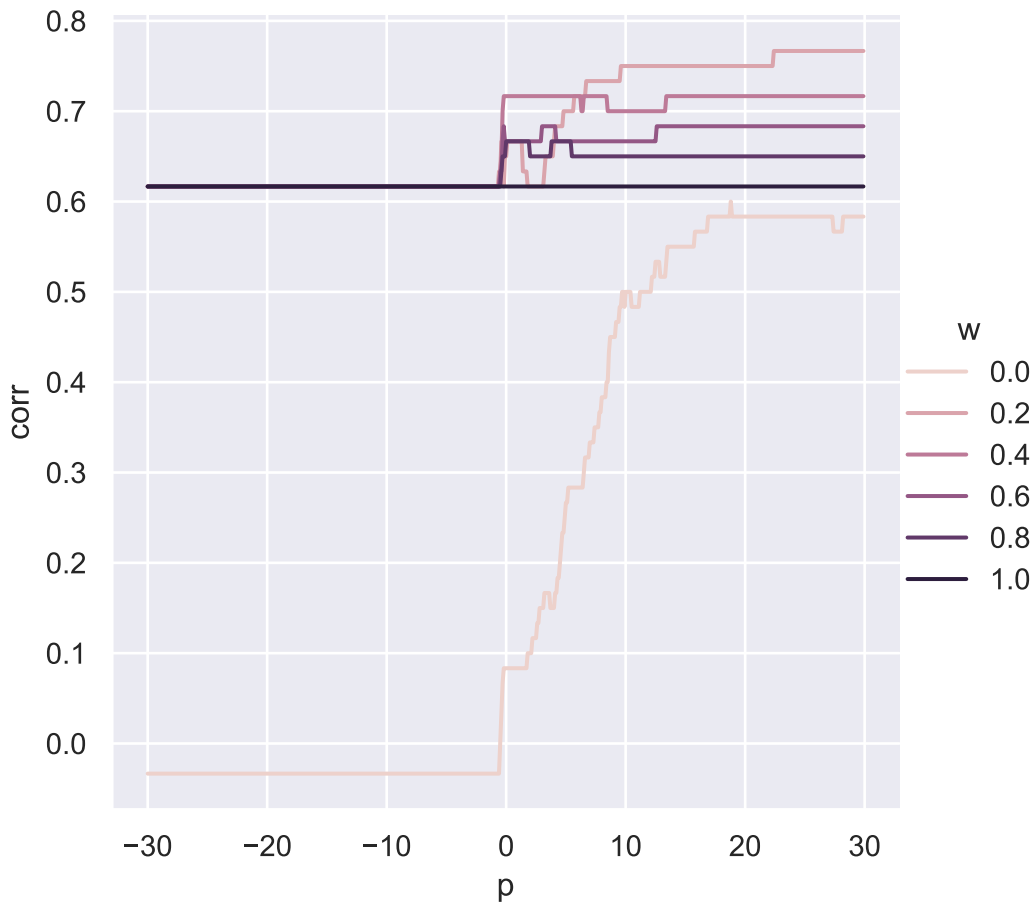

Supplement: note [file SummEval-coherence__LimeExplainer__BERTSCORE_REF_BASED_ROBERTA_DEFAULT__en_test_3.pdf › experiment_graphs_pdf_stratification/SummEval-coherence__LimeExplainer__BERTSCORE_REF_BASED_ROBERTA_DEFAULT__en_test_3.pdf]

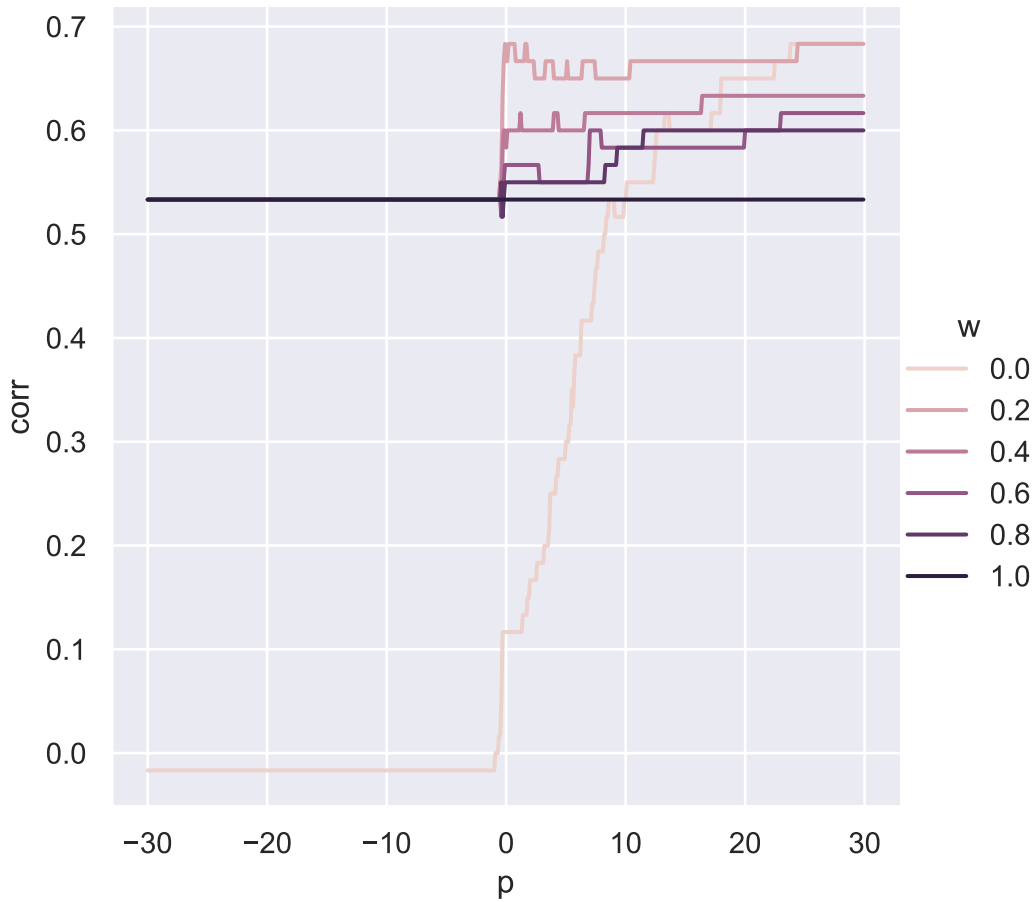

Supplement: note [file SummEval-coherence__LimeExplainer__BERTSCORE_REF_BASED_ROBERTA_DEFAULT__en_test_4.pdf › experiment_graphs_pdf_stratification/SummEval-coherence__LimeExplainer__BERTSCORE_REF_BASED_ROBERTA_DEFAULT__en_test_4.pdf]

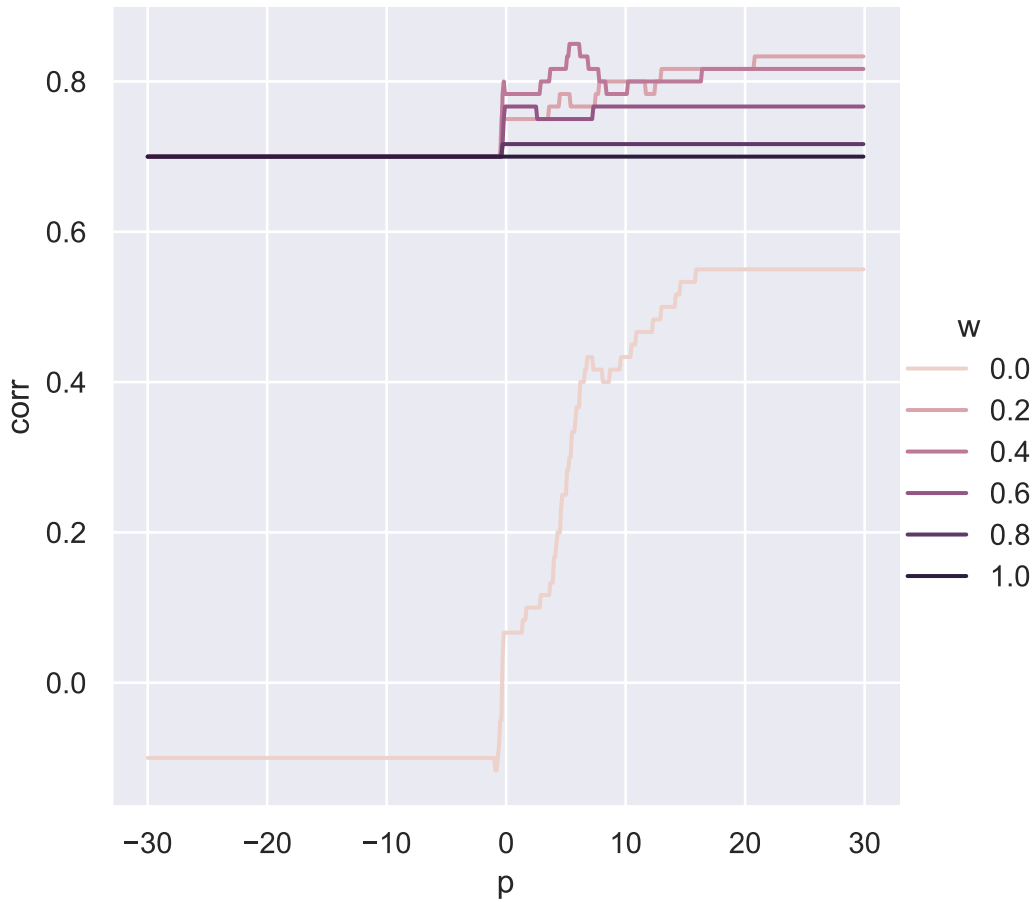

Supplement: note [file SummEval-coherence__LimeExplainer__BERTSCORE_REF_BASED_ROBERTA_DEFAULT__en_test_5.pdf › experiment_graphs_pdf_stratification/SummEval-coherence__LimeExplainer__BERTSCORE_REF_BASED_ROBERTA_DEFAULT__en_test_5.pdf]

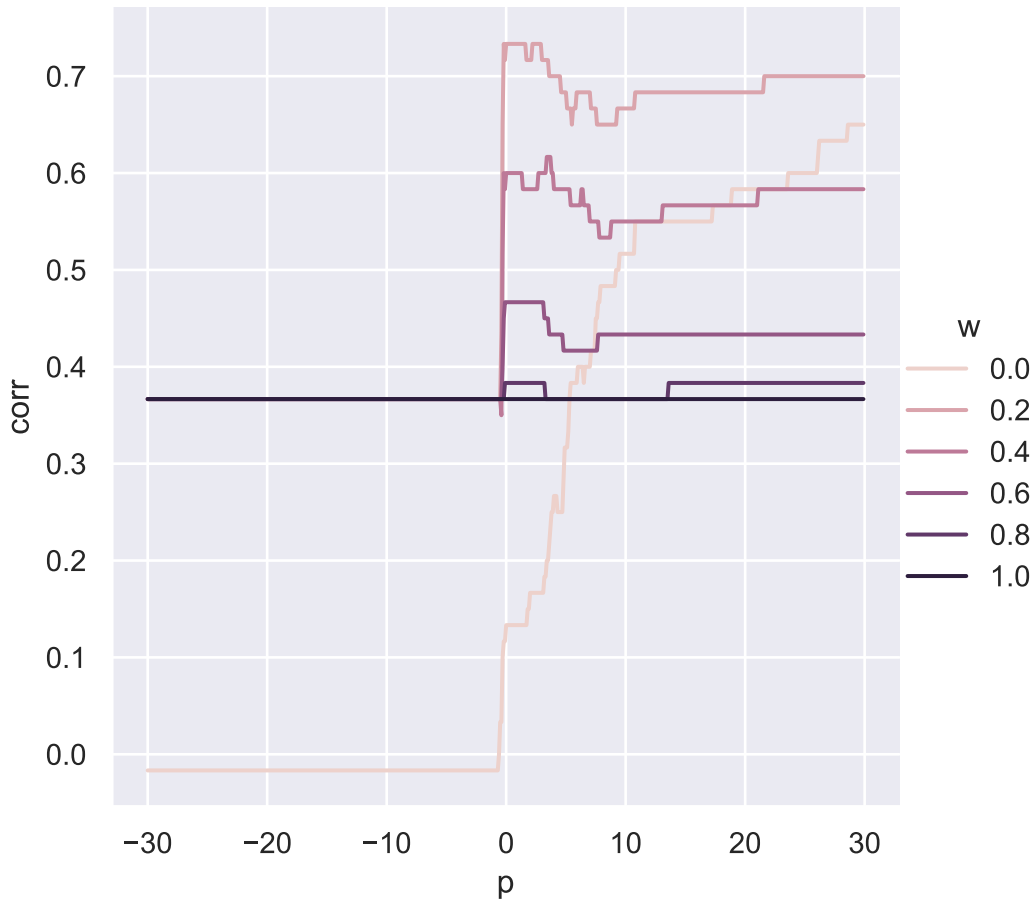

Supplement: note [file SummEval-coherence__LimeExplainer__BERTSCORE_REF_BASED_ROBERTA_DEFAULT__en_test_6.pdf › experiment_graphs_pdf_stratification/SummEval-coherence__LimeExplainer__BERTSCORE_REF_BASED_ROBERTA_DEFAULT__en_test_6.pdf]

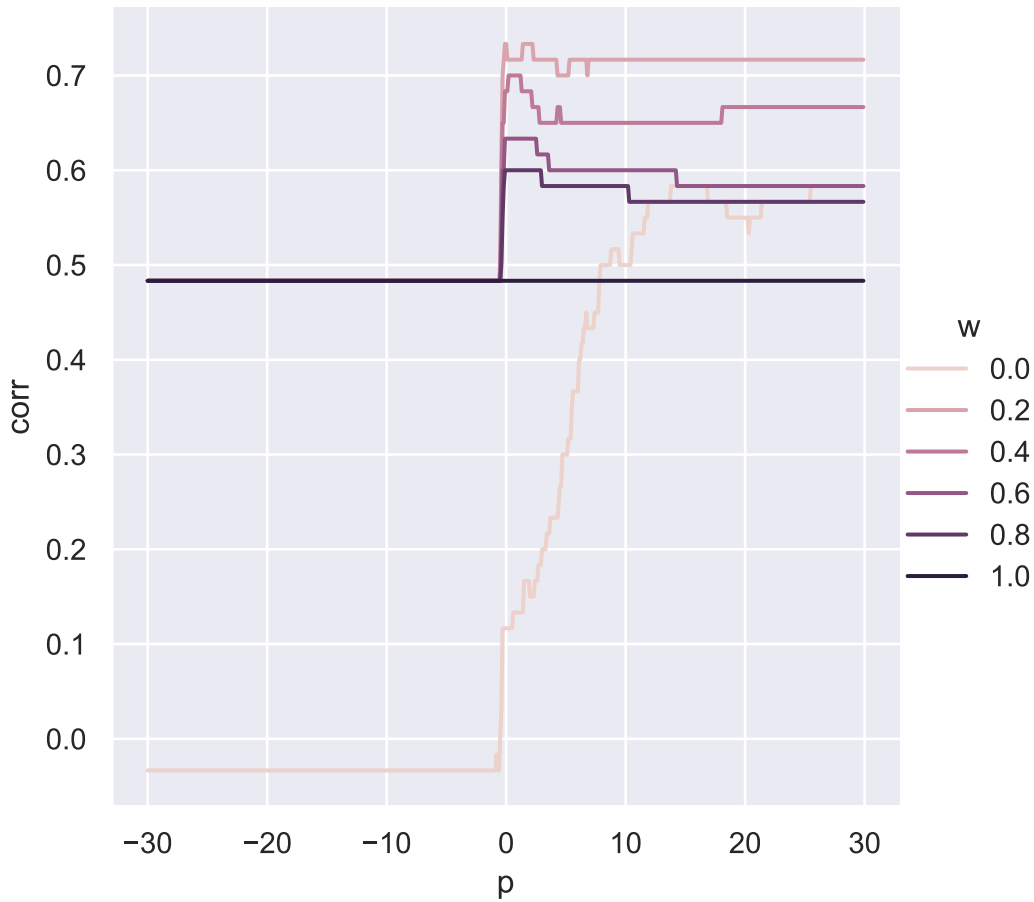

Supplement: note [file SummEval-coherence__LimeExplainer__BERTSCORE_REF_BASED_ROBERTA_DEFAULT__en_test_7.pdf › experiment_graphs_pdf_stratification/SummEval-coherence__LimeExplainer__BERTSCORE_REF_BASED_ROBERTA_DEFAULT__en_test_7.pdf]

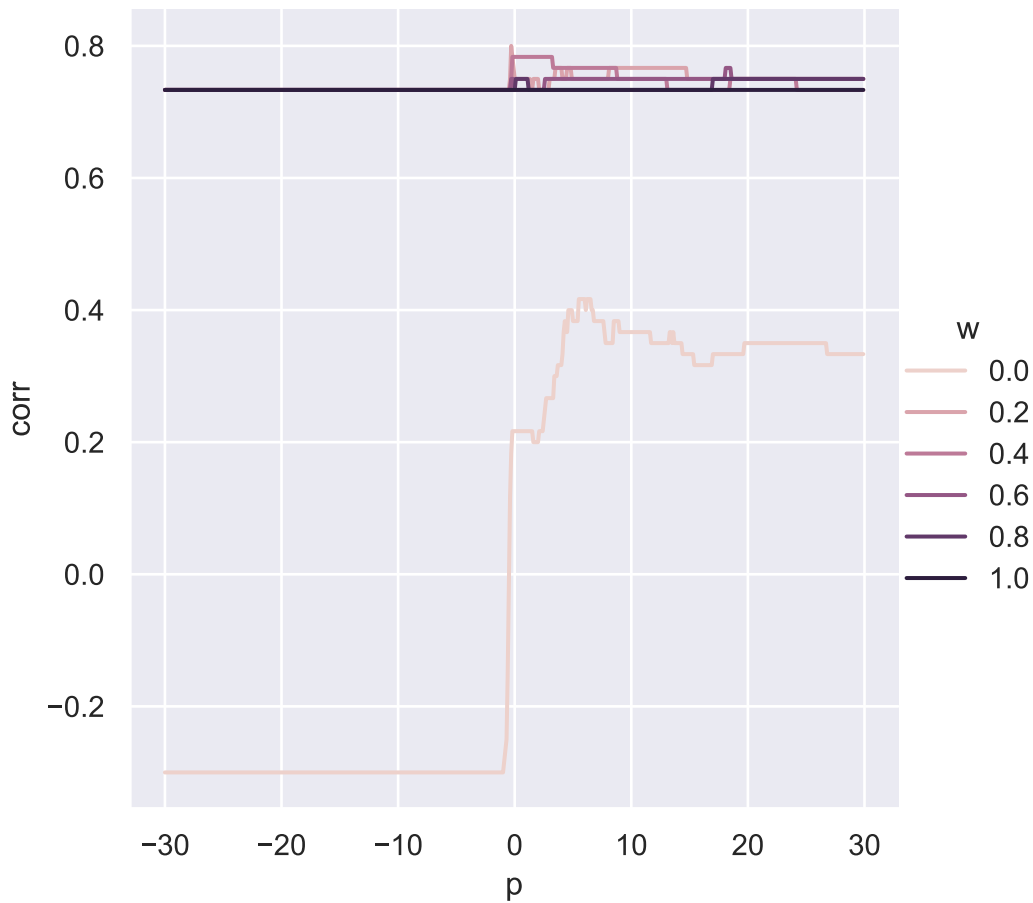

Supplement: note [file SummEval-coherence__LimeExplainer__BERTSCORE_REF_BASED_ROBERTA_DEFAULT__en_train_0.pdf › experiment_graphs_pdf_stratification/SummEval-coherence__LimeExplainer__BERTSCORE_REF_BASED_ROBERTA_DEFAULT__en_train_0.pdf]

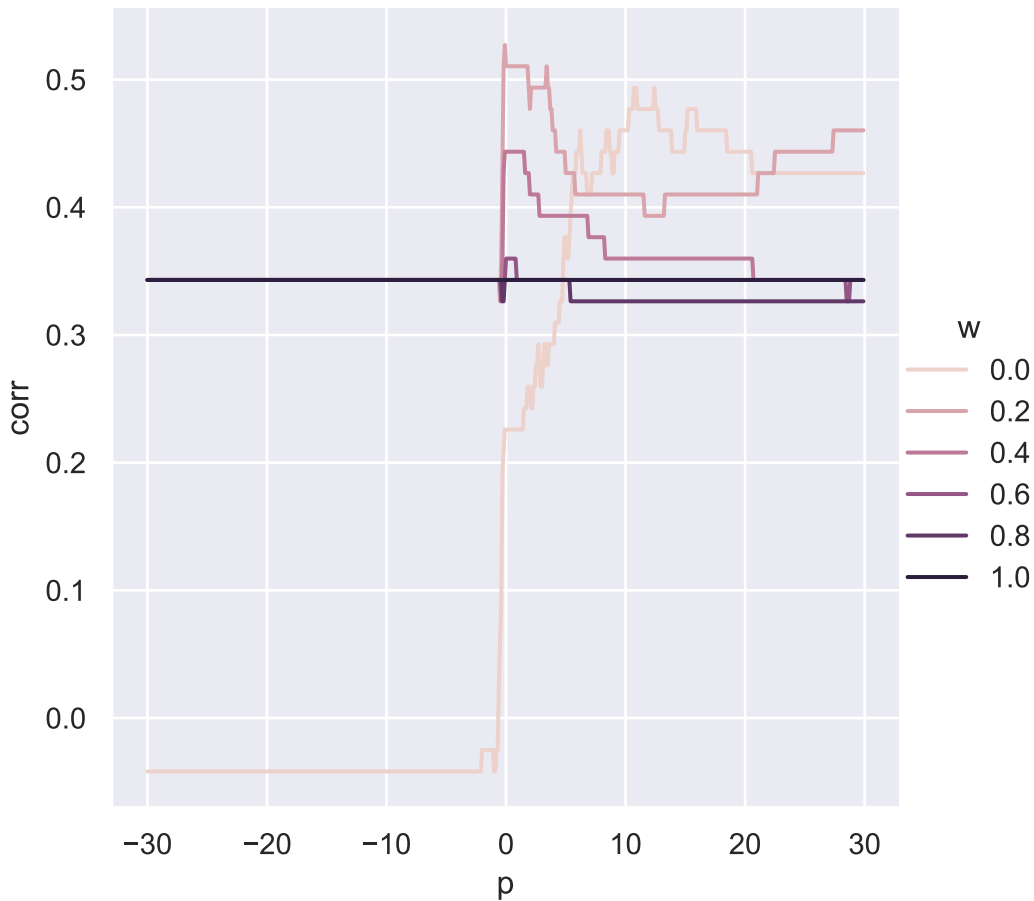

Supplement: note [file SummEval-coherence__LimeExplainer__BERTSCORE_REF_BASED_ROBERTA_DEFAULT__en_train_1.pdf › experiment_graphs_pdf_stratification/SummEval-coherence__LimeExplainer__BERTSCORE_REF_BASED_ROBERTA_DEFAULT__en_train_1.pdf]

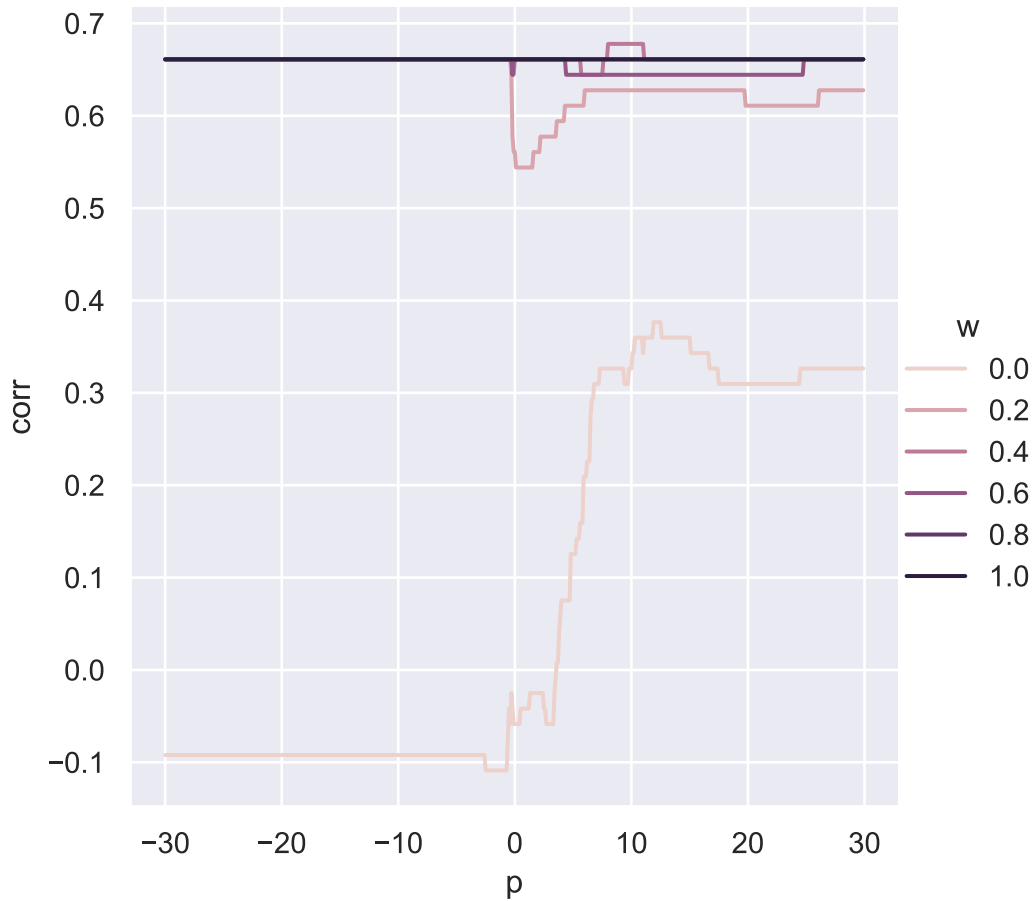

Supplement: note [file SummEval-coherence__LimeExplainer__BERTSCORE_REF_BASED_ROBERTA_DEFAULT__en_train_2.pdf › experiment_graphs_pdf_stratification/SummEval-coherence__LimeExplainer__BERTSCORE_REF_BASED_ROBERTA_DEFAULT__en_train_2.pdf]

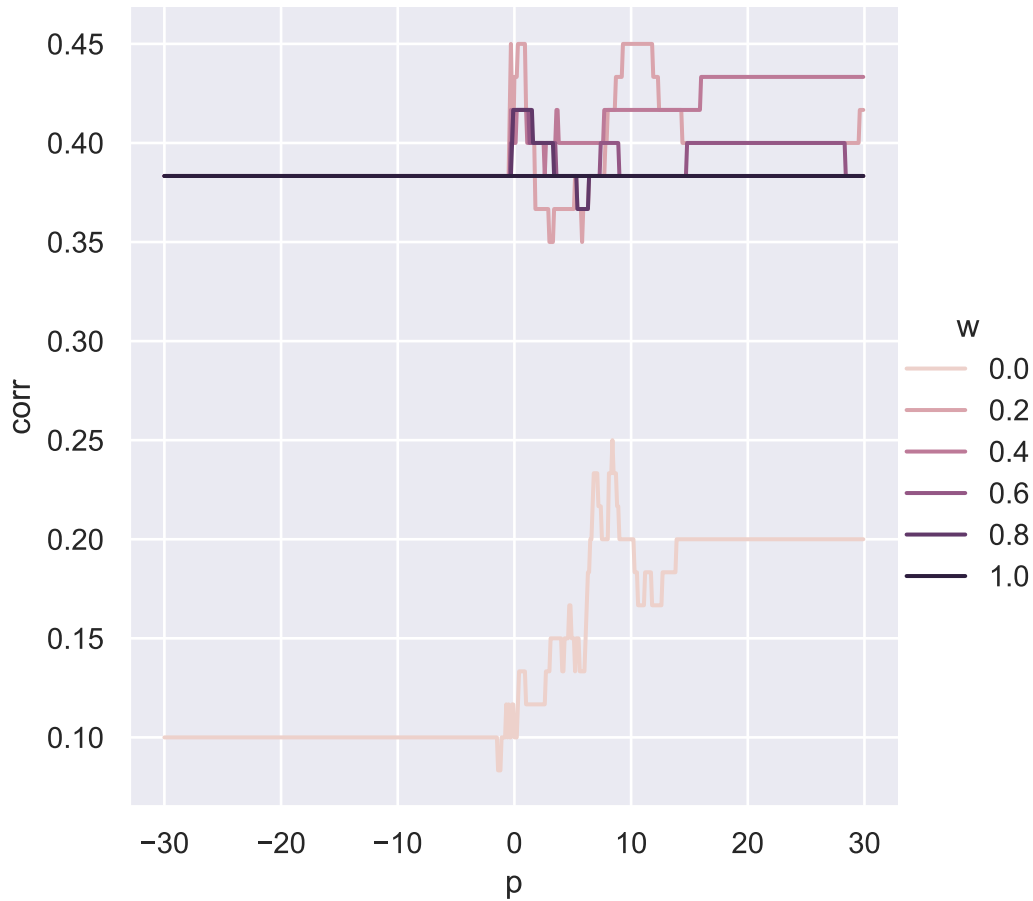

Supplement: note [file SummEval-coherence__LimeExplainer__BERTSCORE_REF_BASED_ROBERTA_DEFAULT__en_train_3.pdf › experiment_graphs_pdf_stratification/SummEval-coherence__LimeExplainer__BERTSCORE_REF_BASED_ROBERTA_DEFAULT__en_train_3.pdf]

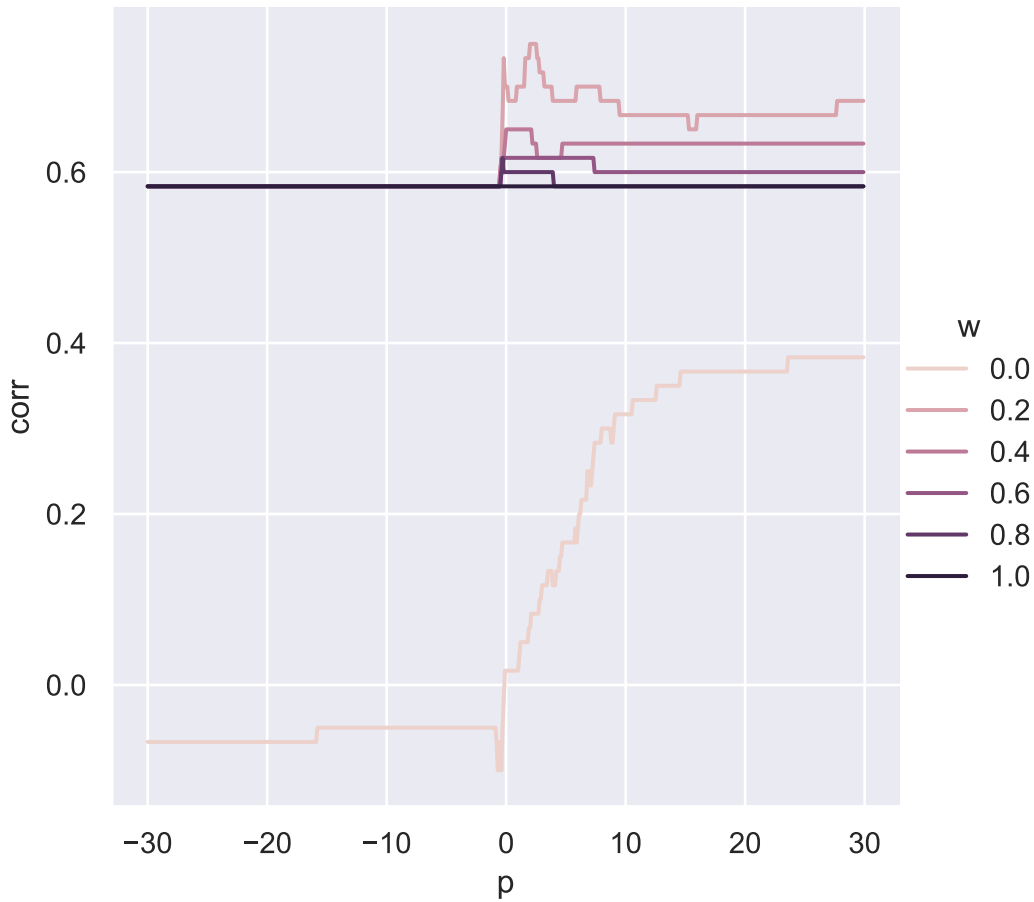

Supplement: note [file SummEval-coherence__LimeExplainer__BERTSCORE_REF_BASED_ROBERTA_DEFAULT__en_train_4.pdf › experiment_graphs_pdf_stratification/SummEval-coherence__LimeExplainer__BERTSCORE_REF_BASED_ROBERTA_DEFAULT__en_train_4.pdf]

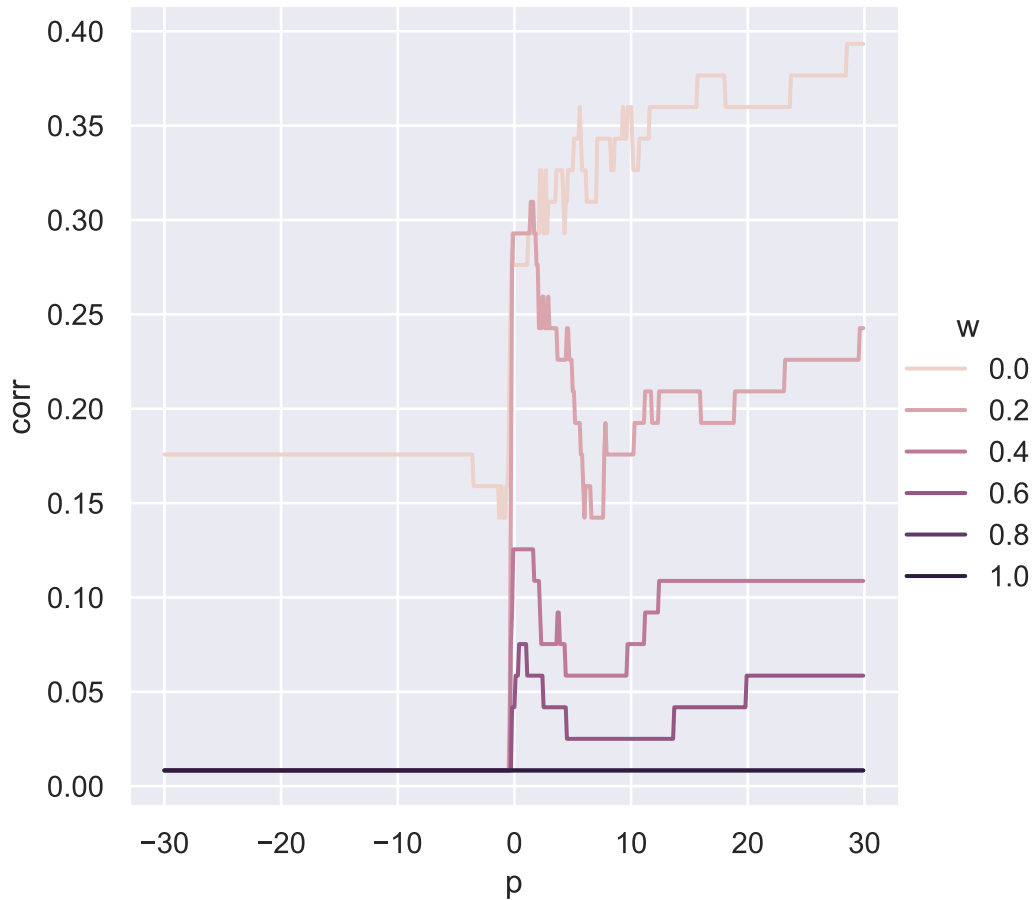

Supplement: note [file SummEval-coherence__LimeExplainer__BERTSCORE_REF_BASED_ROBERTA_DEFAULT__en_train_5.pdf › experiment_graphs_pdf_stratification/SummEval-coherence__LimeExplainer__BERTSCORE_REF_BASED_ROBERTA_DEFAULT__en_train_5.pdf]

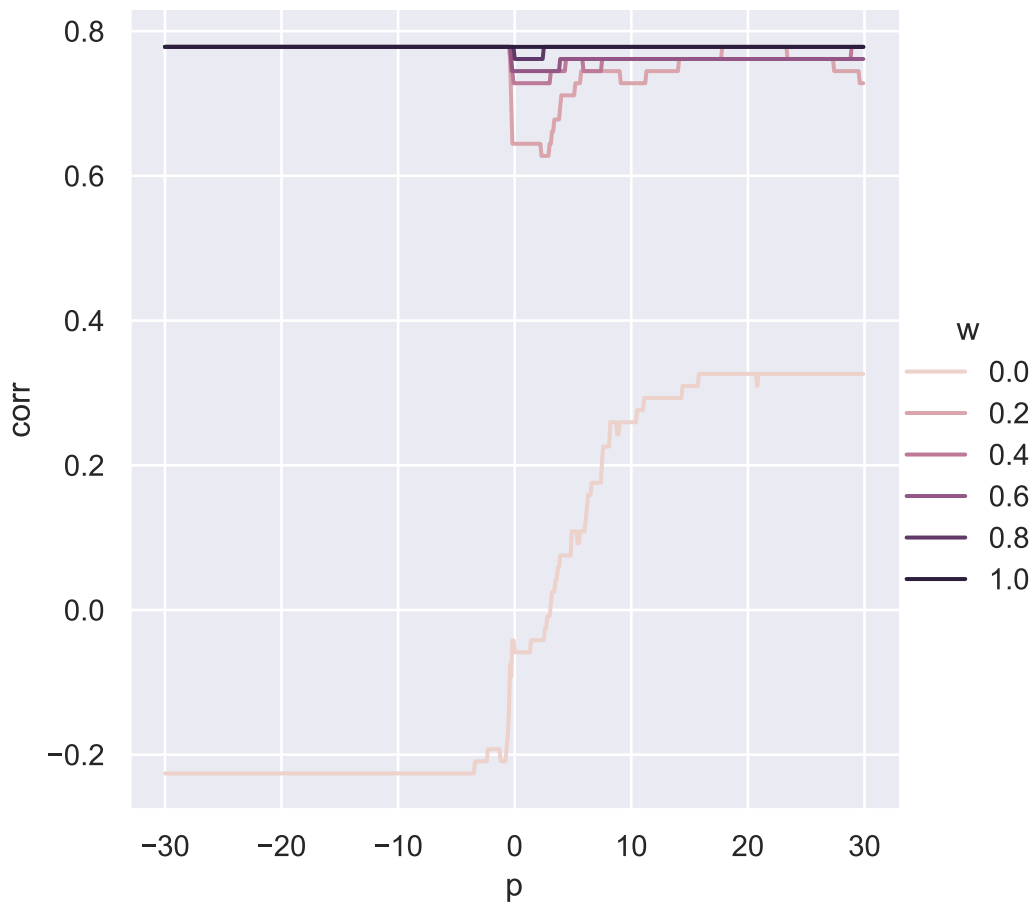

Supplement: note [file SummEval-coherence__LimeExplainer__BERTSCORE_REF_BASED_ROBERTA_DEFAULT__en_train_6.pdf › experiment_graphs_pdf_stratification/SummEval-coherence__LimeExplainer__BERTSCORE_REF_BASED_ROBERTA_DEFAULT__en_train_6.pdf]

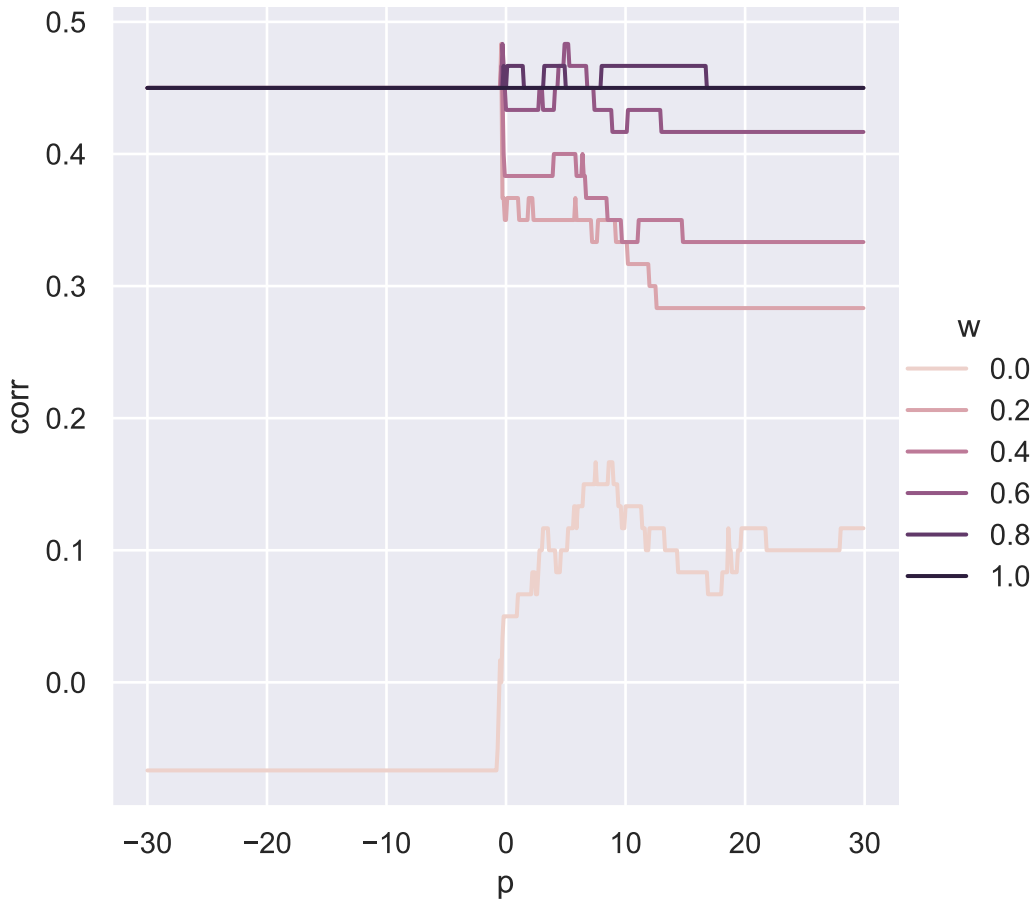

Supplement: note [file SummEval-coherence__LimeExplainer__BERTSCORE_REF_BASED_ROBERTA_DEFAULT__en_train_7.pdf › experiment_graphs_pdf_stratification/SummEval-coherence__LimeExplainer__BERTSCORE_REF_BASED_ROBERTA_DEFAULT__en_train_7.pdf]

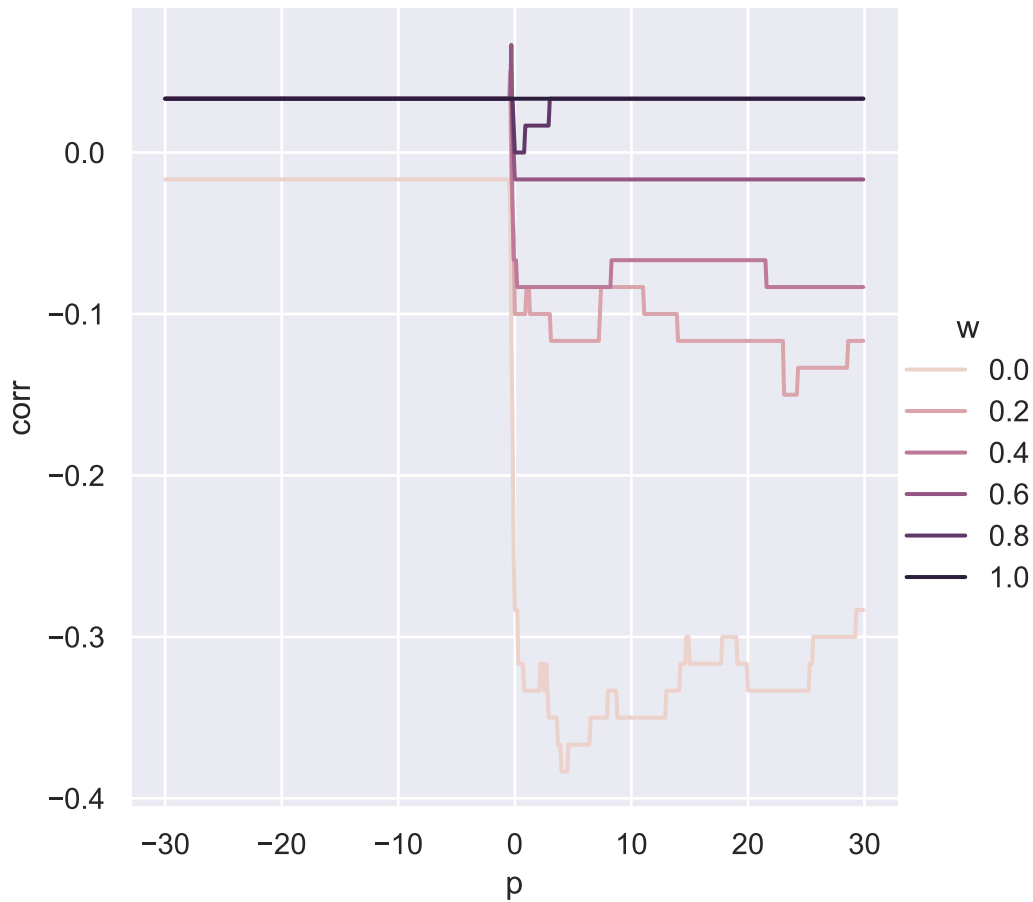

Supplement: note [file SummEval-coherence__LimeExplainer__RandomScore__en_test_0.pdf › experiment_graphs_pdf_stratification/SummEval-coherence__LimeExplainer__RandomScore__en_test_0.pdf]

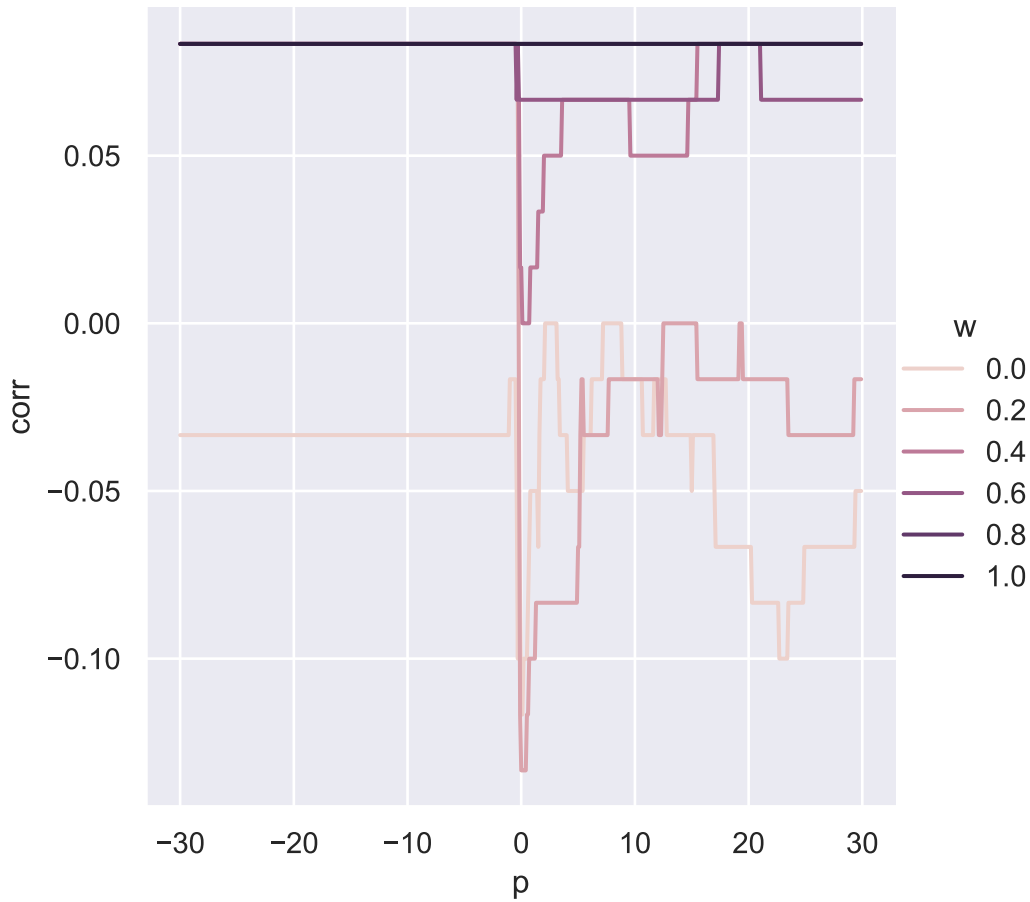

Supplement: note [file SummEval-coherence__LimeExplainer__RandomScore__en_test_1.pdf › experiment_graphs_pdf_stratification/SummEval-coherence__LimeExplainer__RandomScore__en_test_1.pdf]

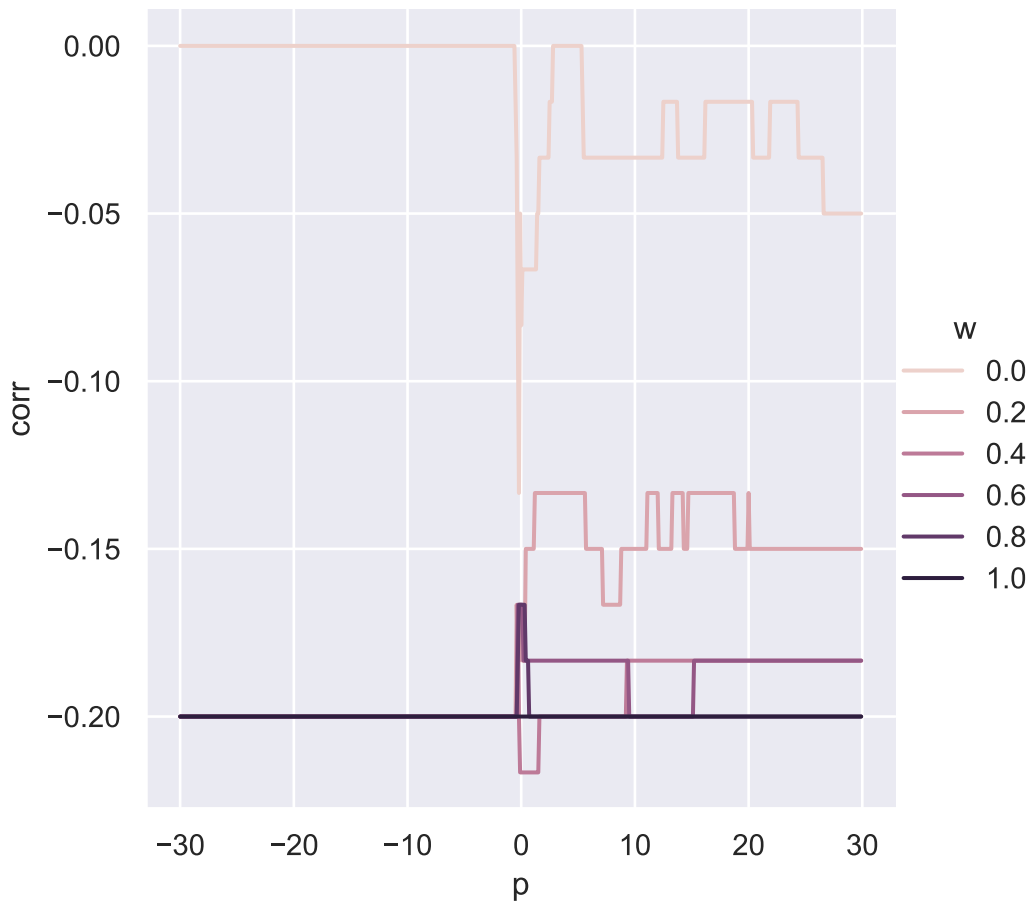

Supplement: note [file SummEval-coherence__LimeExplainer__RandomScore__en_test_2.pdf › experiment_graphs_pdf_stratification/SummEval-coherence__LimeExplainer__RandomScore__en_test_2.pdf]

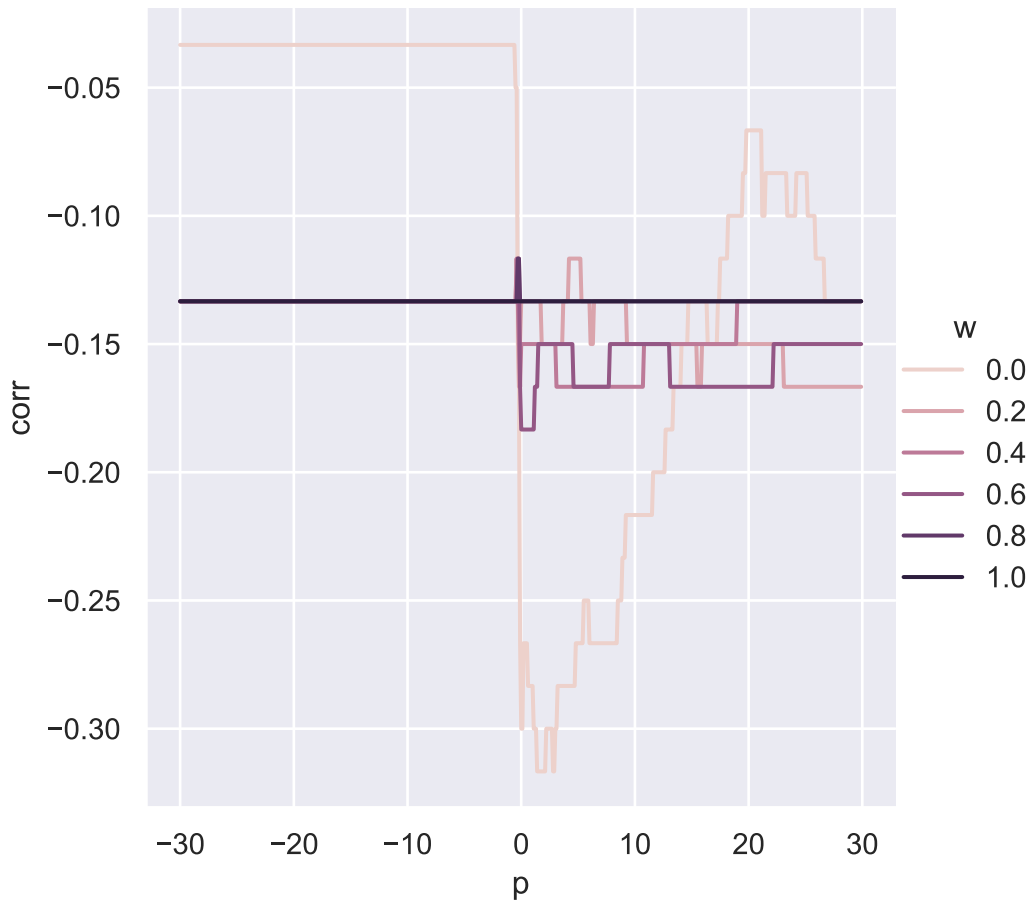

Supplement: note [file SummEval-coherence__LimeExplainer__RandomScore__en_test_3.pdf › experiment_graphs_pdf_stratification/SummEval-coherence__LimeExplainer__RandomScore__en_test_3.pdf]

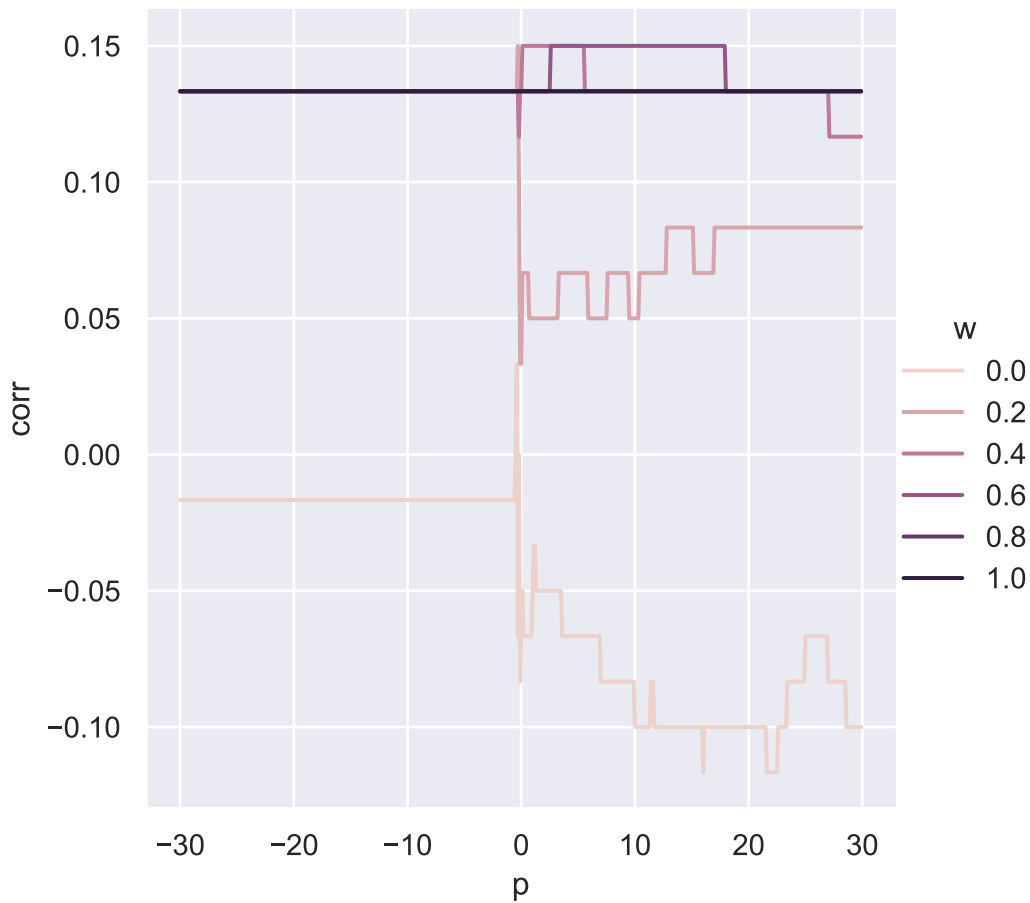

Supplement: note [file SummEval-coherence__LimeExplainer__RandomScore__en_test_4.pdf › experiment_graphs_pdf_stratification/SummEval-coherence__LimeExplainer__RandomScore__en_test_4.pdf]

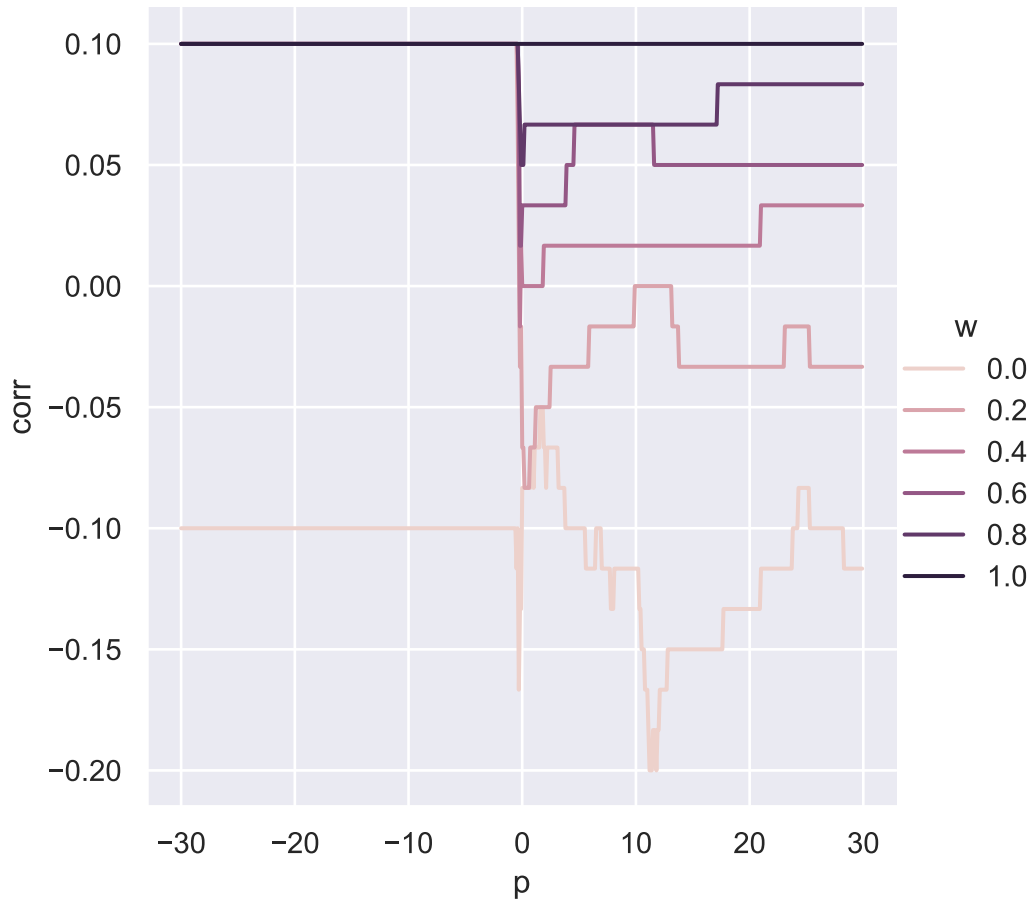

Supplement: note [file SummEval-coherence__LimeExplainer__RandomScore__en_test_5.pdf › experiment_graphs_pdf_stratification/SummEval-coherence__LimeExplainer__RandomScore__en_test_5.pdf]

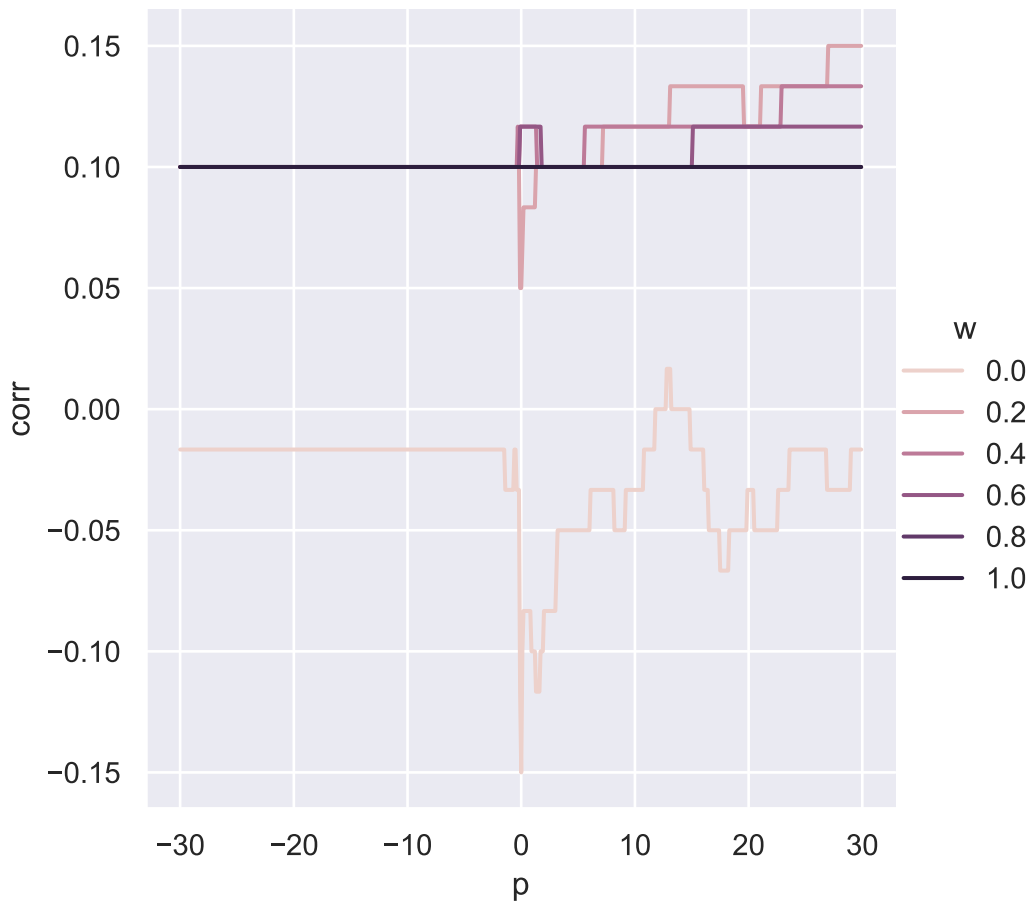

Supplement: note [file SummEval-coherence__LimeExplainer__RandomScore__en_test_6.pdf › experiment_graphs_pdf_stratification/SummEval-coherence__LimeExplainer__RandomScore__en_test_6.pdf]

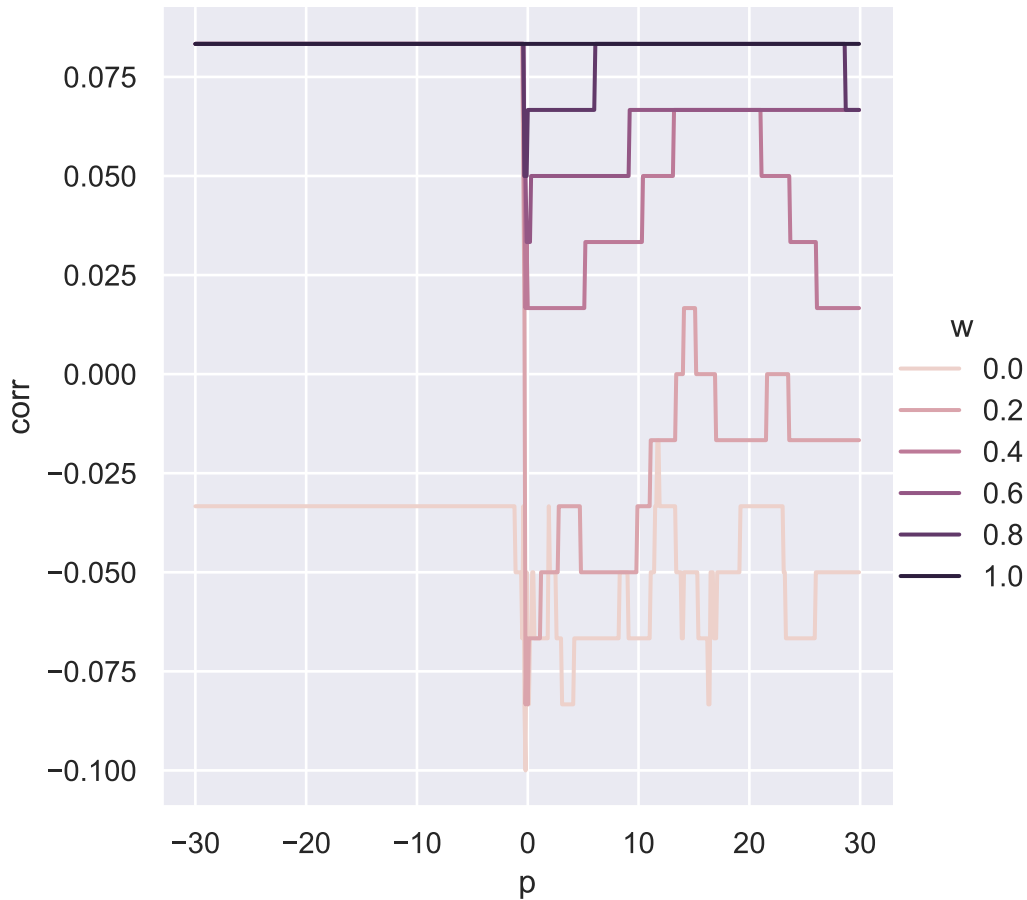

Supplement: note [file SummEval-coherence__LimeExplainer__RandomScore__en_test_7.pdf › experiment_graphs_pdf_stratification/SummEval-coherence__LimeExplainer__RandomScore__en_test_7.pdf]

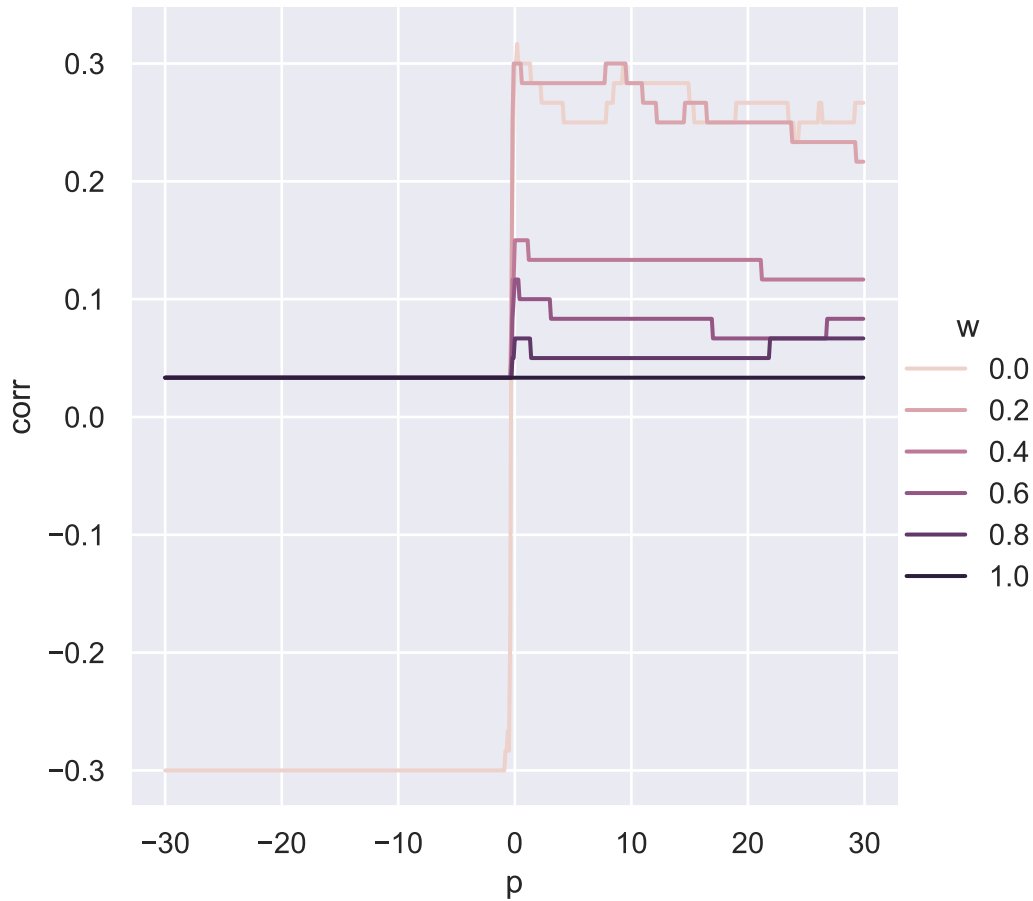

Supplement: note [file SummEval-coherence__LimeExplainer__RandomScore__en_train_0.pdf › experiment_graphs_pdf_stratification/SummEval-coherence__LimeExplainer__RandomScore__en_train_0.pdf]

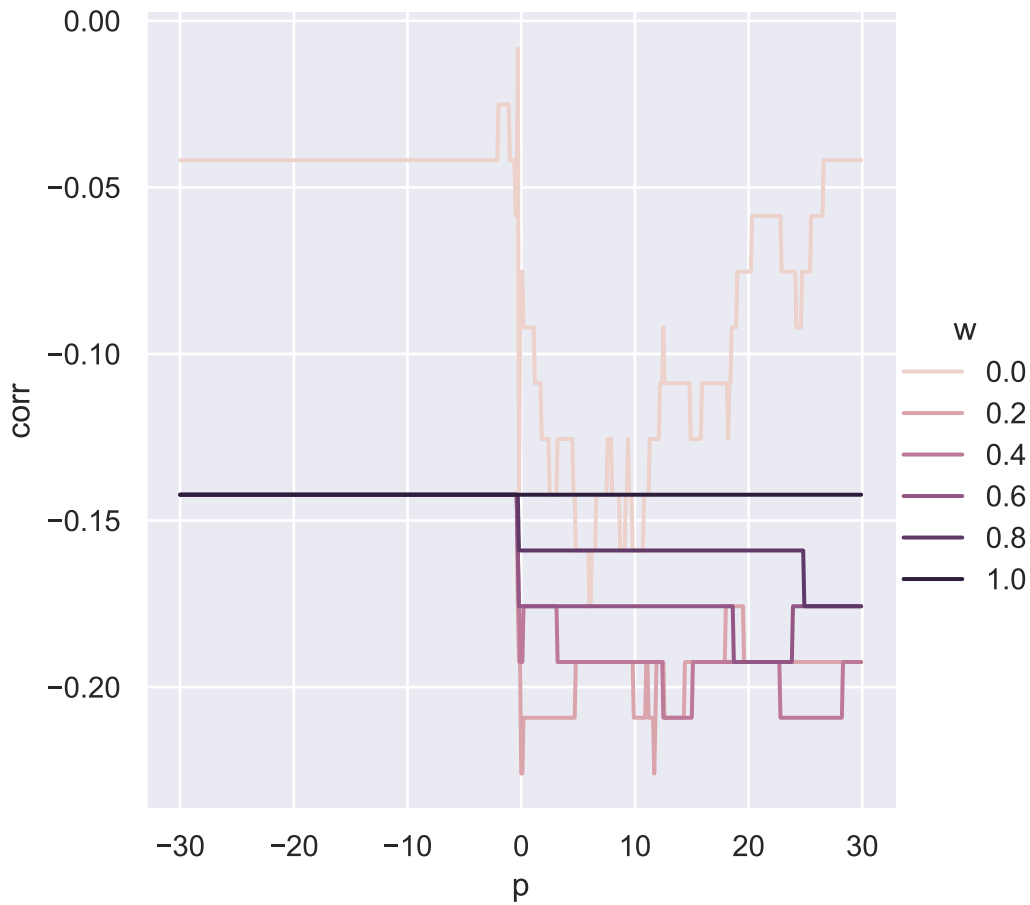

Supplement: note [file SummEval-coherence__LimeExplainer__RandomScore__en_train_1.pdf › experiment_graphs_pdf_stratification/SummEval-coherence__LimeExplainer__RandomScore__en_train_1.pdf]

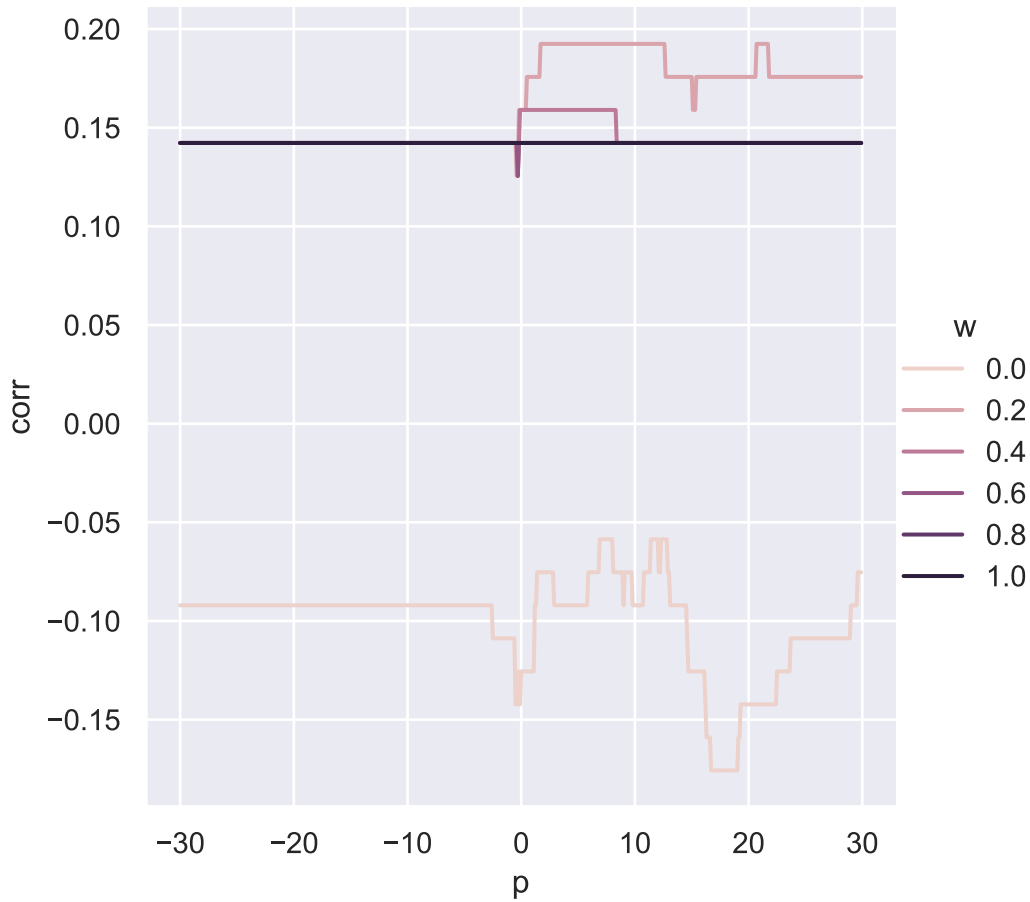

Supplement: note [file SummEval-coherence__LimeExplainer__RandomScore__en_train_2.pdf › experiment_graphs_pdf_stratification/SummEval-coherence__LimeExplainer__RandomScore__en_train_2.pdf]

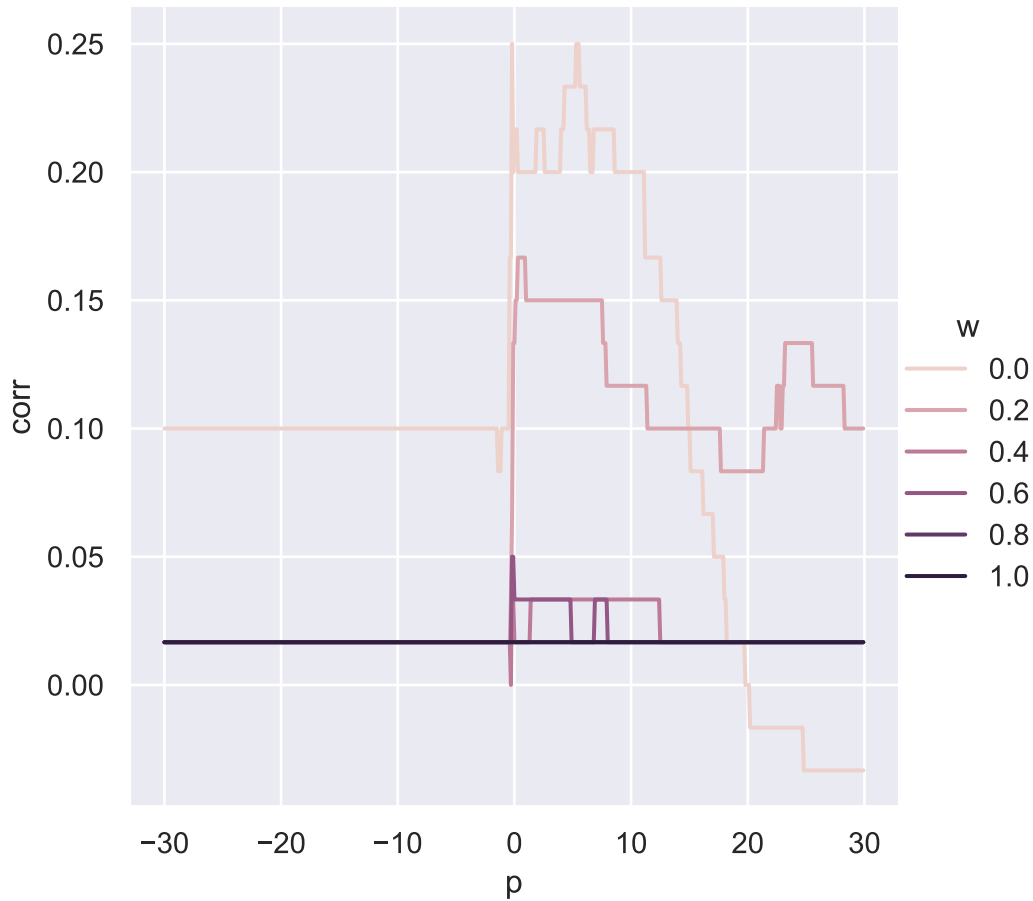

Supplement: note [file SummEval-coherence__LimeExplainer__RandomScore__en_train_3.pdf › experiment_graphs_pdf_stratification/SummEval-coherence__LimeExplainer__RandomScore__en_train_3.pdf]

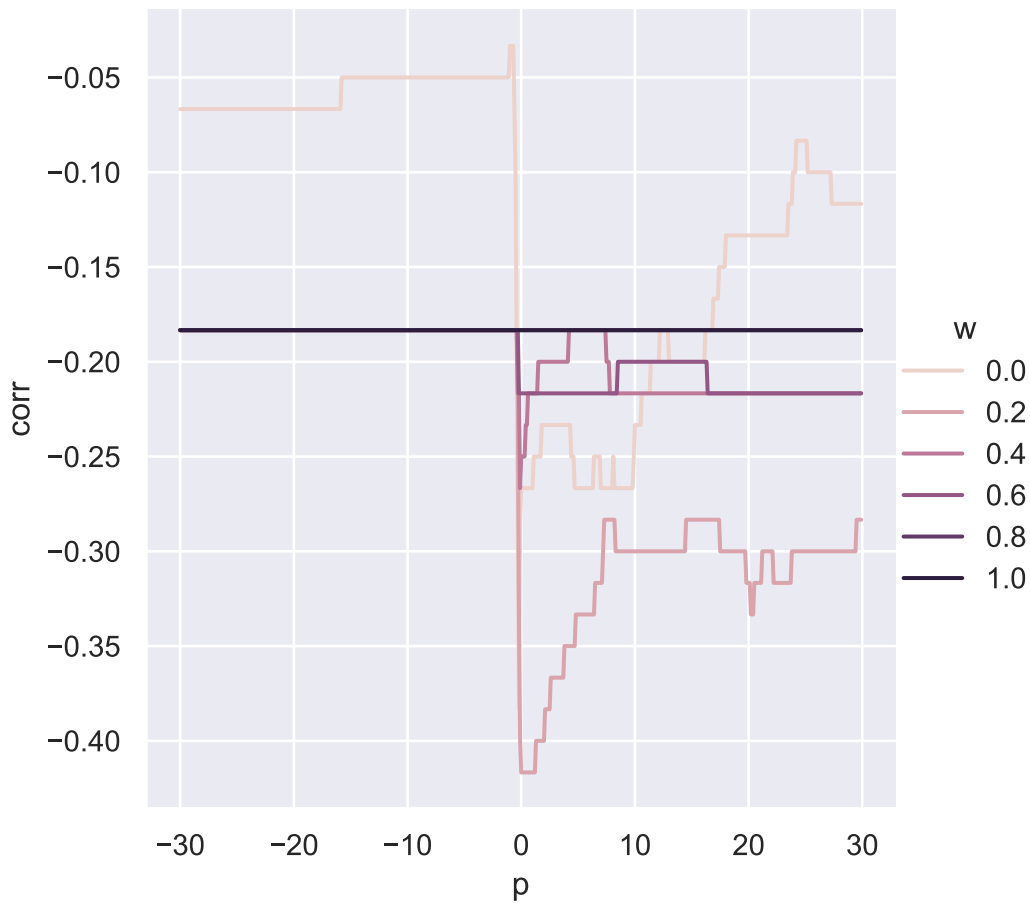

Supplement: note [file SummEval-coherence__LimeExplainer__RandomScore__en_train_4.pdf › experiment_graphs_pdf_stratification/SummEval-coherence__LimeExplainer__RandomScore__en_train_4.pdf]

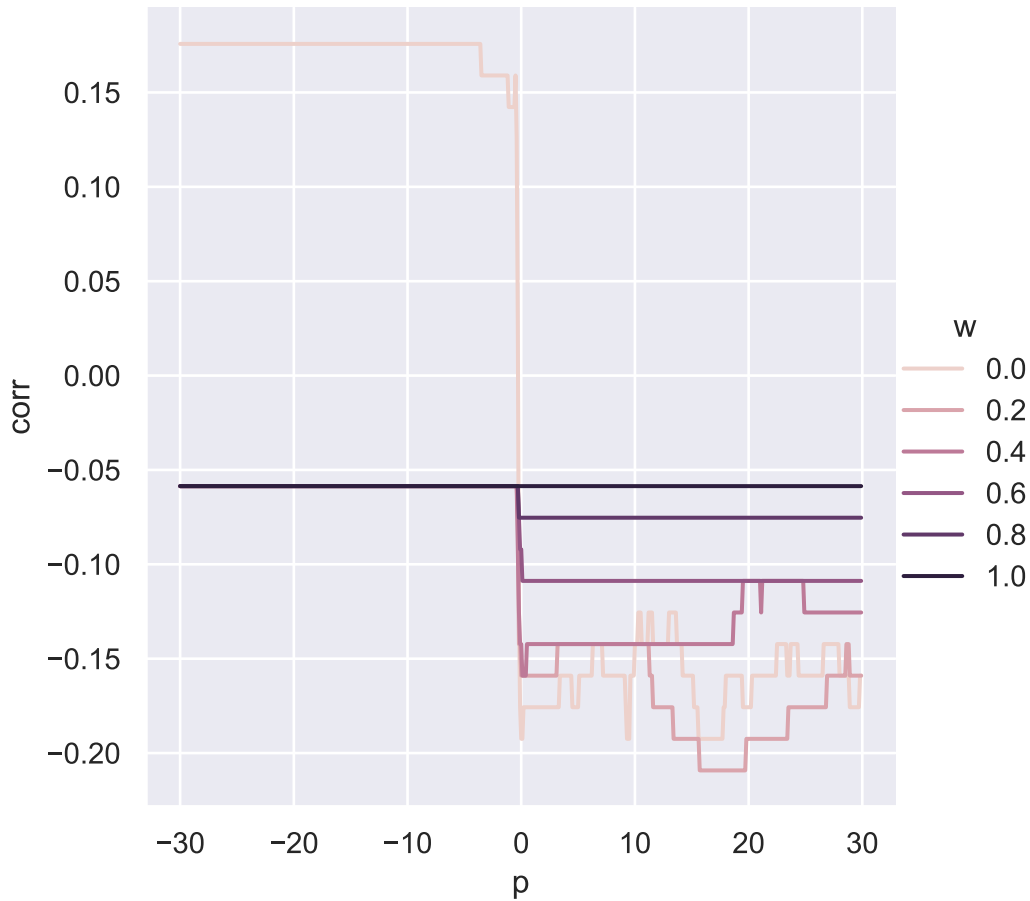

Supplement: note [file SummEval-coherence__LimeExplainer__RandomScore__en_train_5.pdf › experiment_graphs_pdf_stratification/SummEval-coherence__LimeExplainer__RandomScore__en_train_5.pdf]

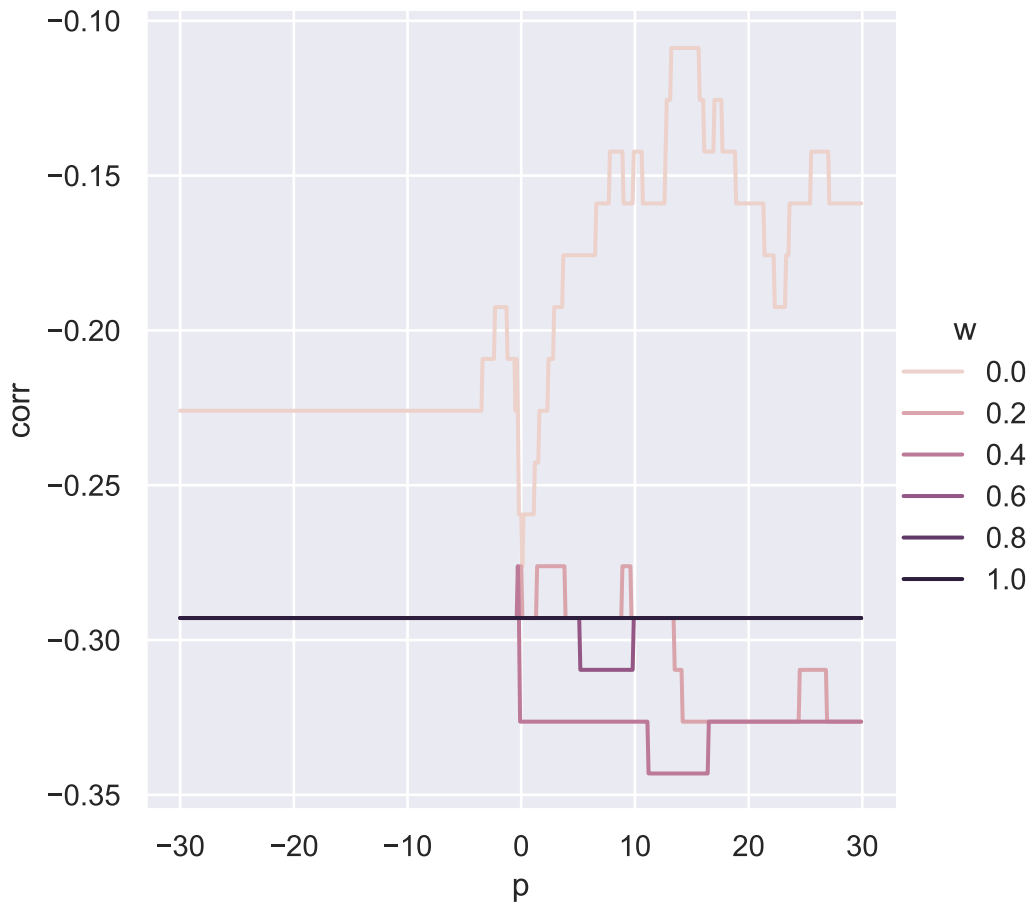

Supplement: note [file SummEval-coherence__LimeExplainer__RandomScore__en_train_6.pdf › experiment_graphs_pdf_stratification/SummEval-coherence__LimeExplainer__RandomScore__en_train_6.pdf]

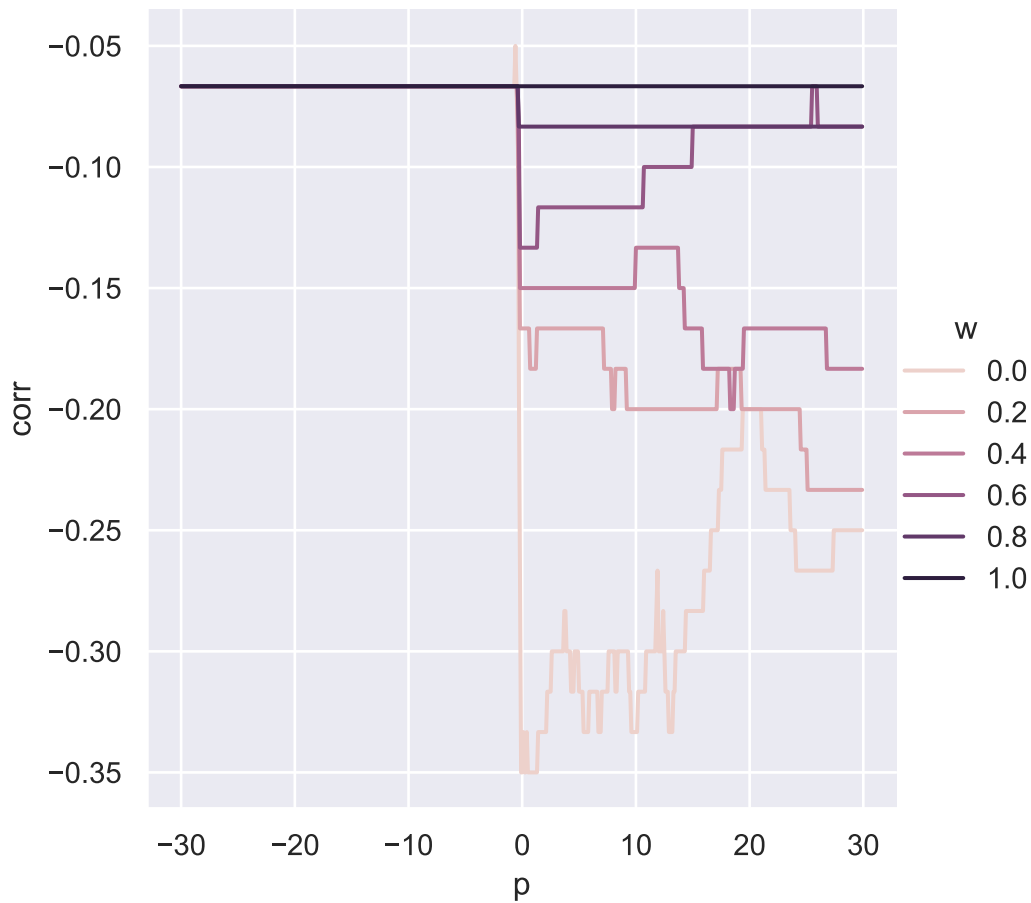

Supplement: note [file SummEval-coherence__LimeExplainer__RandomScore__en_train_7.pdf › experiment_graphs_pdf_stratification/SummEval-coherence__LimeExplainer__RandomScore__en_train_7.pdf]

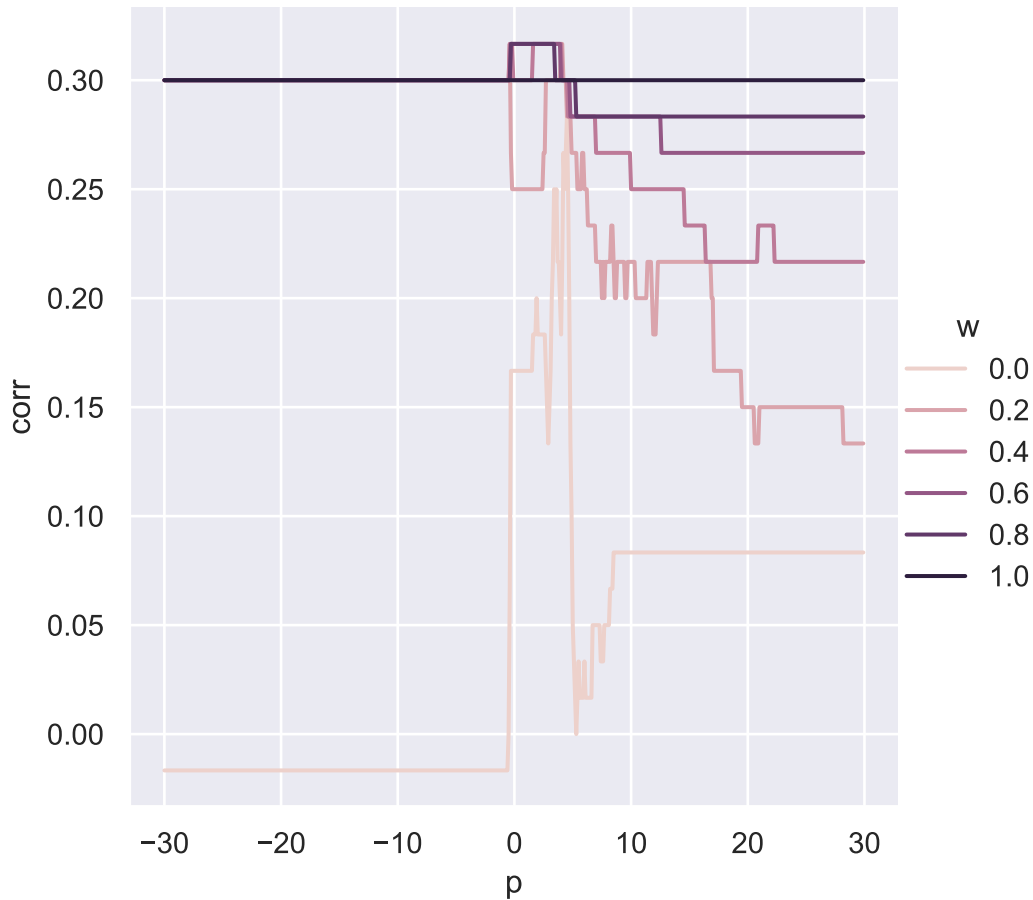

Supplement: note [file SummEval-coherence__LimeExplainer__Rouge-1__en_test_0.pdf › experiment_graphs_pdf_stratification/SummEval-coherence__LimeExplainer__Rouge-1__en_test_0.pdf]

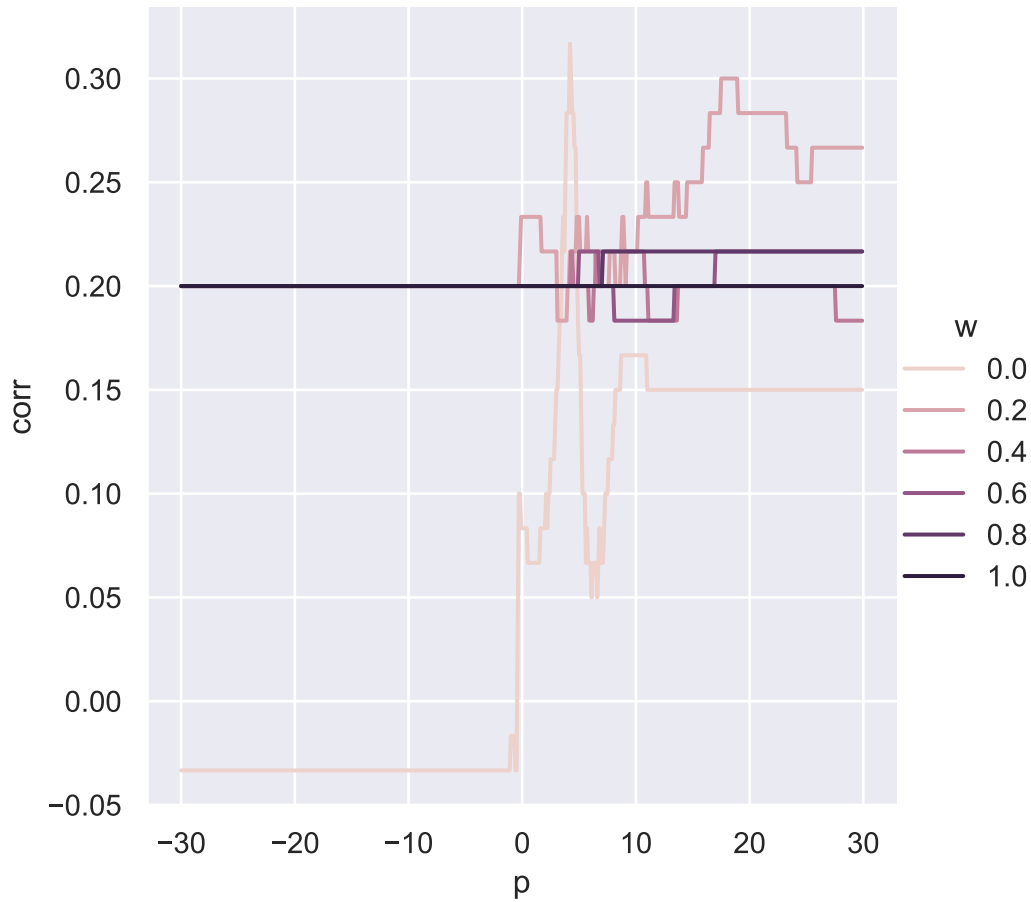

Supplement: note [file SummEval-coherence__LimeExplainer__Rouge-1__en_test_1.pdf › experiment_graphs_pdf_stratification/SummEval-coherence__LimeExplainer__Rouge-1__en_test_1.pdf]

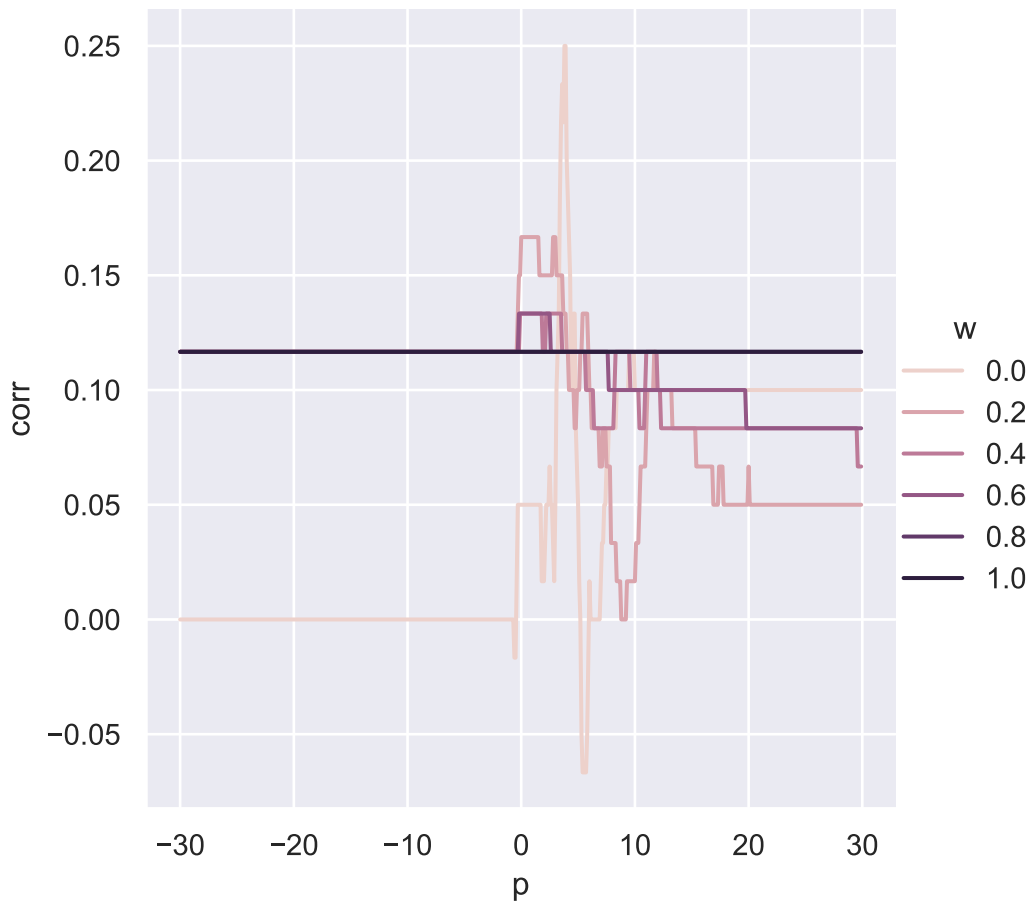

Supplement: note [file SummEval-coherence__LimeExplainer__Rouge-1__en_test_2.pdf › experiment_graphs_pdf_stratification/SummEval-coherence__LimeExplainer__Rouge-1__en_test_2.pdf]

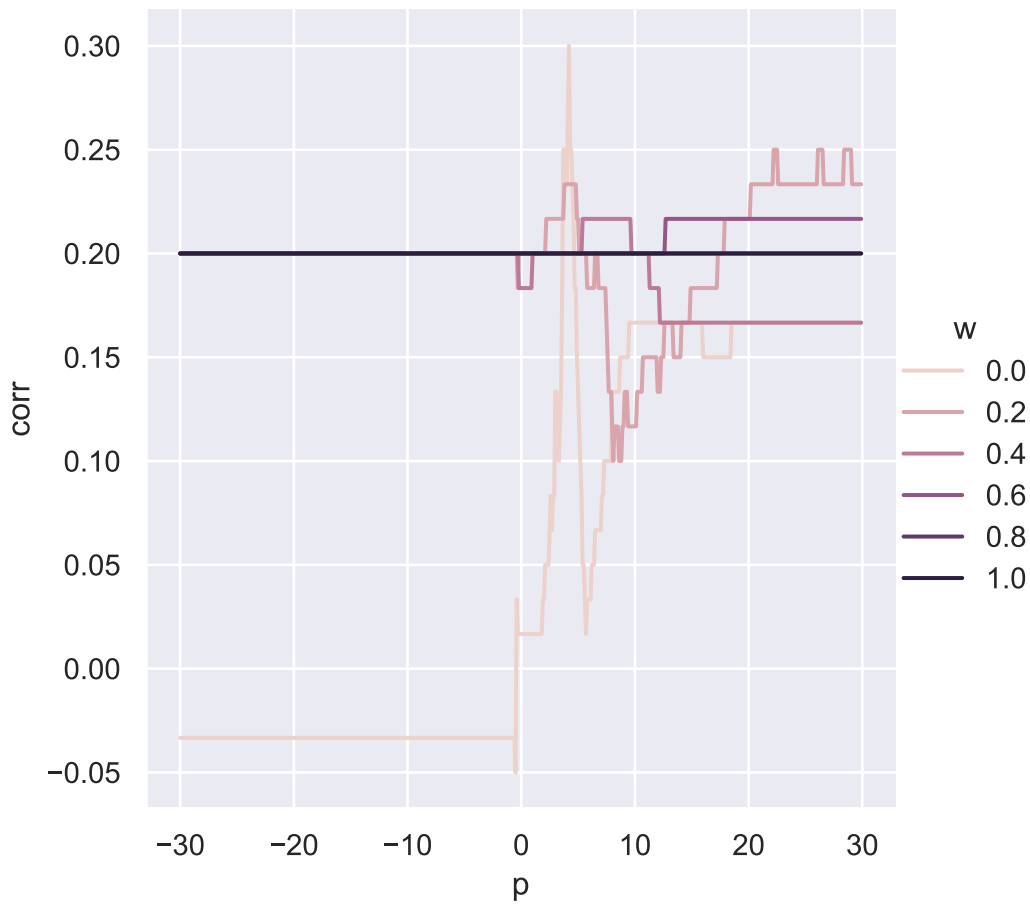

Supplement: note [file SummEval-coherence__LimeExplainer__Rouge-1__en_test_3.pdf › experiment_graphs_pdf_stratification/SummEval-coherence__LimeExplainer__Rouge-1__en_test_3.pdf]

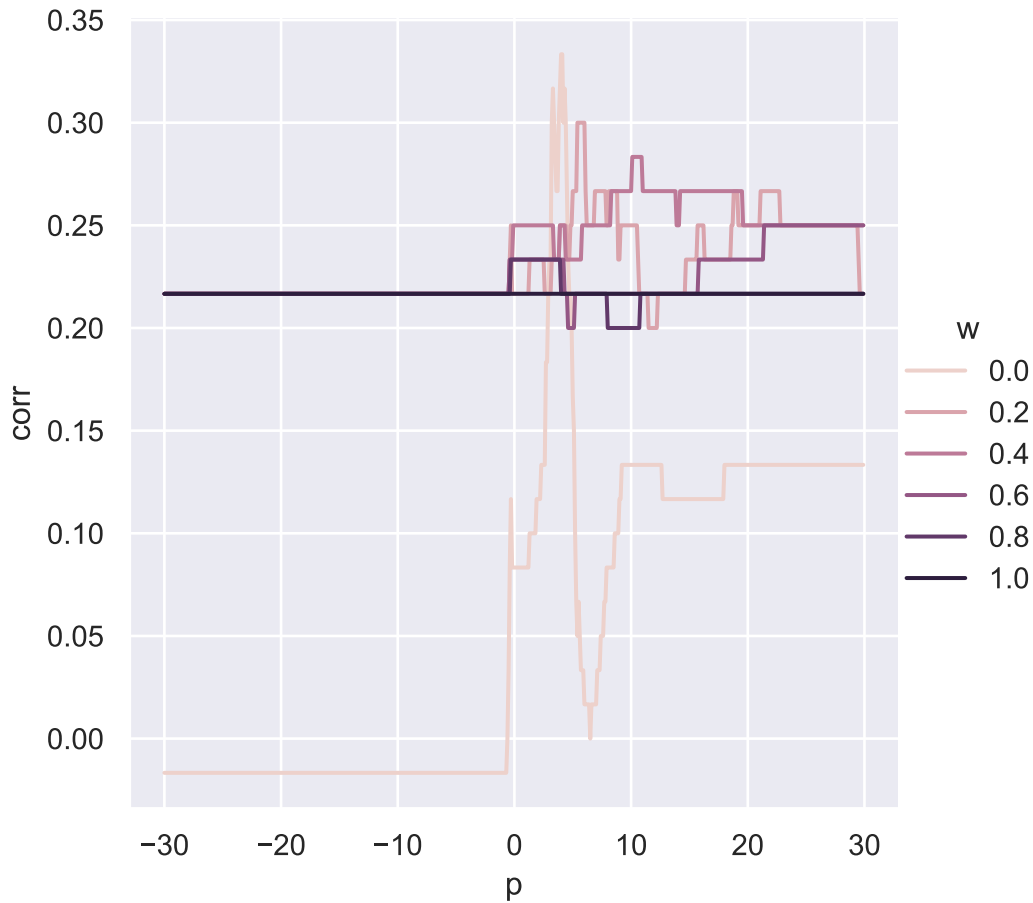

Supplement: note [file SummEval-coherence__LimeExplainer__Rouge-1__en_test_4.pdf › experiment_graphs_pdf_stratification/SummEval-coherence__LimeExplainer__Rouge-1__en_test_4.pdf]

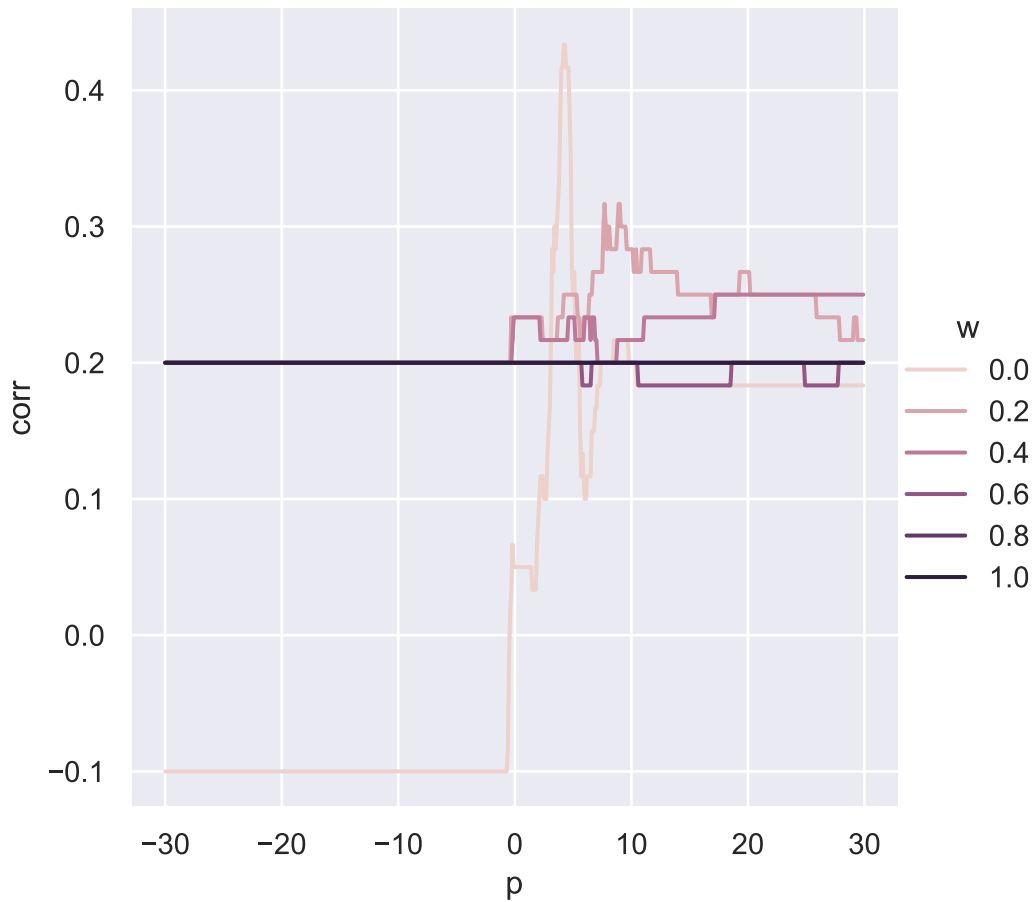

Supplement: note [file SummEval-coherence__LimeExplainer__Rouge-1__en_test_5.pdf › experiment_graphs_pdf_stratification/SummEval-coherence__LimeExplainer__Rouge-1__en_test_5.pdf]

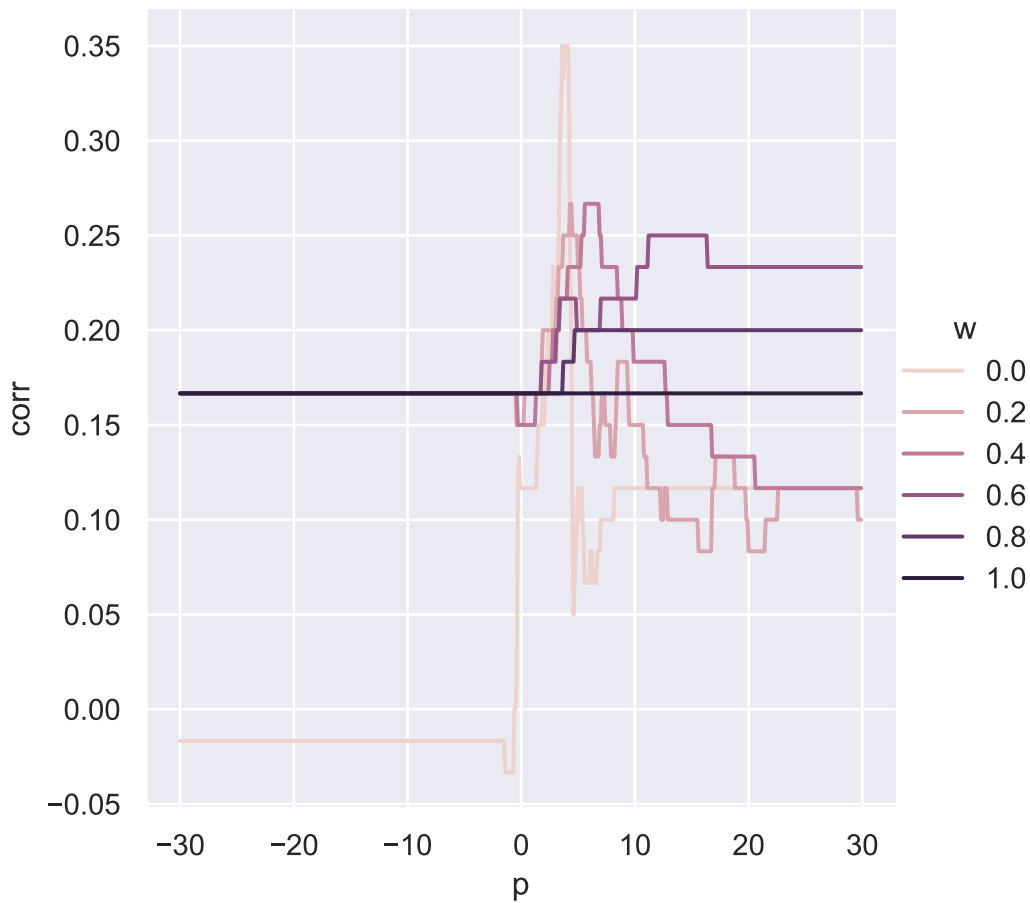

Supplement: note [file SummEval-coherence__LimeExplainer__Rouge-1__en_test_6.pdf › experiment_graphs_pdf_stratification/SummEval-coherence__LimeExplainer__Rouge-1__en_test_6.pdf]

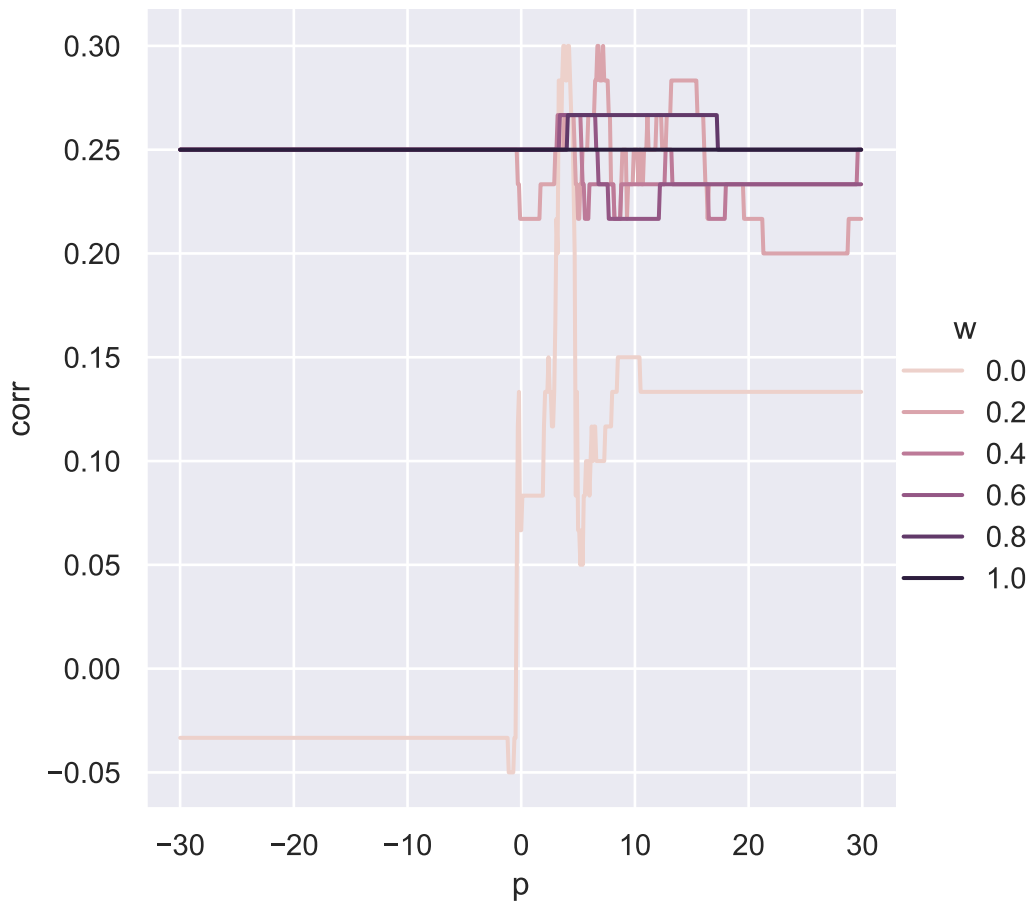

Supplement: note [file SummEval-coherence__LimeExplainer__Rouge-1__en_test_7.pdf › experiment_graphs_pdf_stratification/SummEval-coherence__LimeExplainer__Rouge-1__en_test_7.pdf]

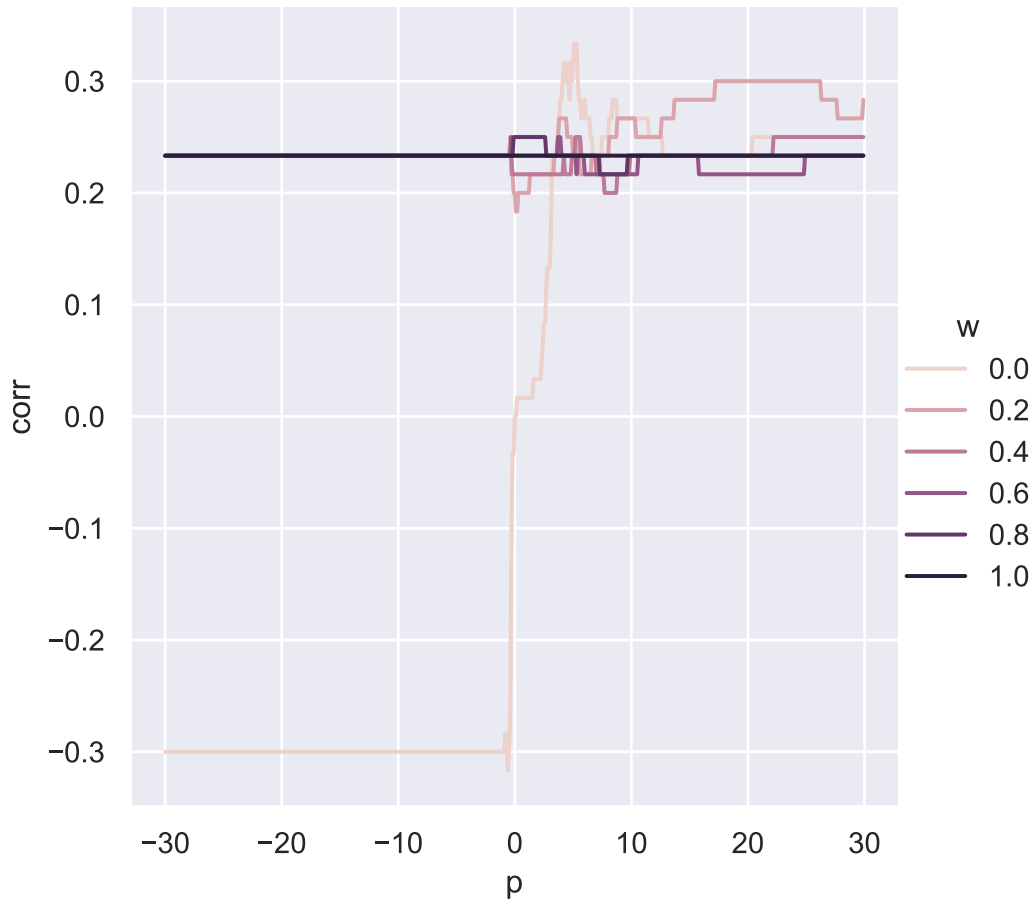

Supplement: note [file SummEval-coherence__LimeExplainer__Rouge-1__en_train_0.pdf › experiment_graphs_pdf_stratification/SummEval-coherence__LimeExplainer__Rouge-1__en_train_0.pdf]

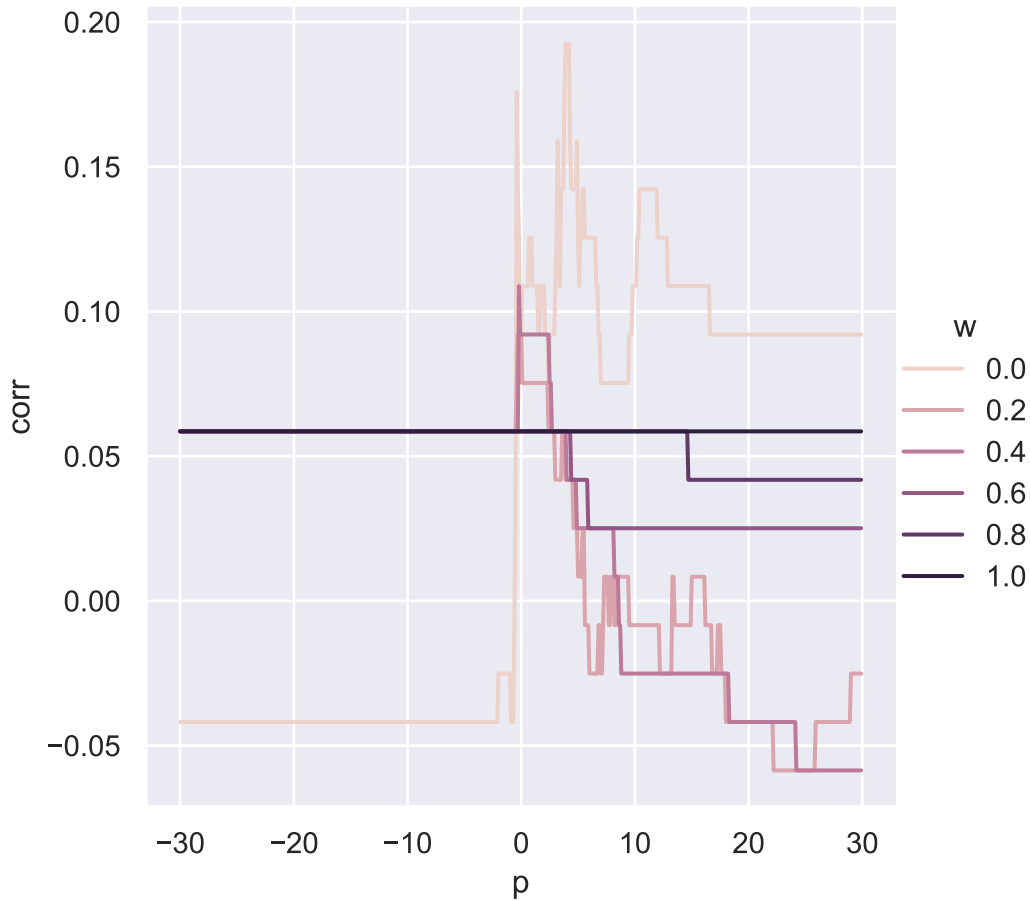

Supplement: note [file SummEval-coherence__LimeExplainer__Rouge-1__en_train_1.pdf › experiment_graphs_pdf_stratification/SummEval-coherence__LimeExplainer__Rouge-1__en_train_1.pdf]

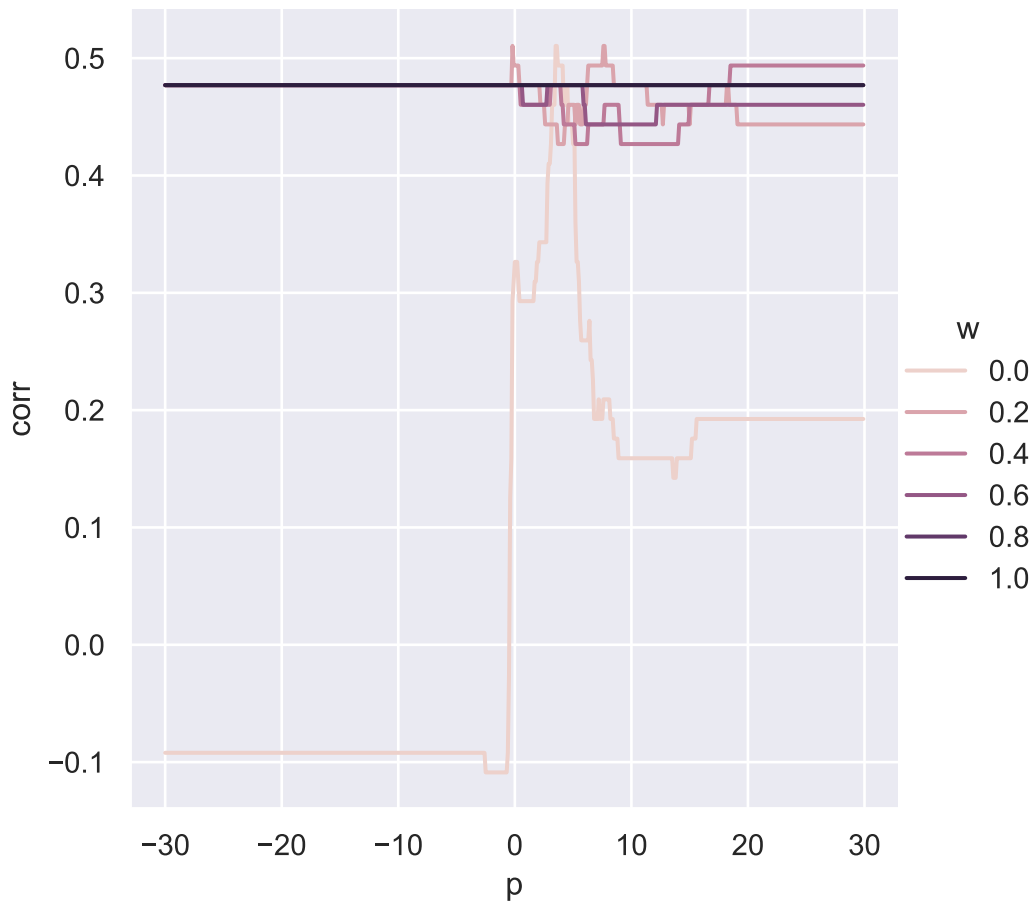

Supplement: note [file SummEval-coherence__LimeExplainer__Rouge-1__en_train_2.pdf › experiment_graphs_pdf_stratification/SummEval-coherence__LimeExplainer__Rouge-1__en_train_2.pdf]

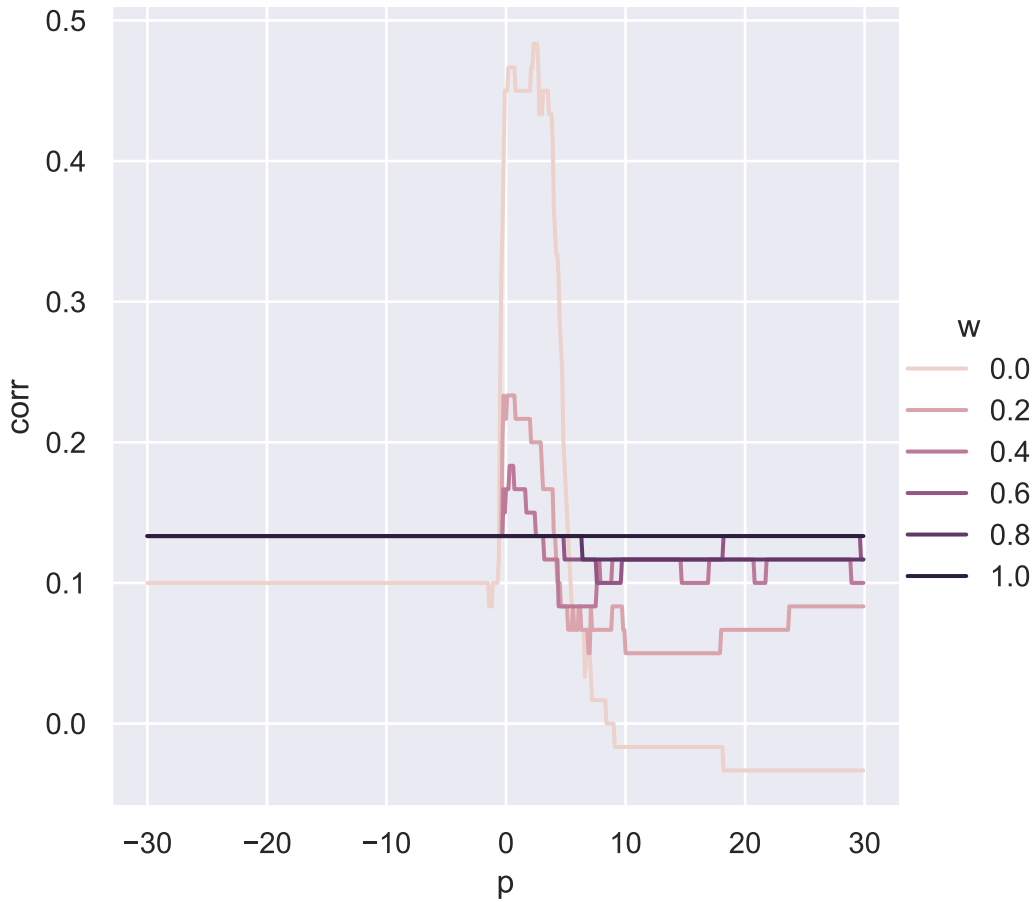

Supplement: note [file SummEval-coherence__LimeExplainer__Rouge-1__en_train_3.pdf › experiment_graphs_pdf_stratification/SummEval-coherence__LimeExplainer__Rouge-1__en_train_3.pdf]

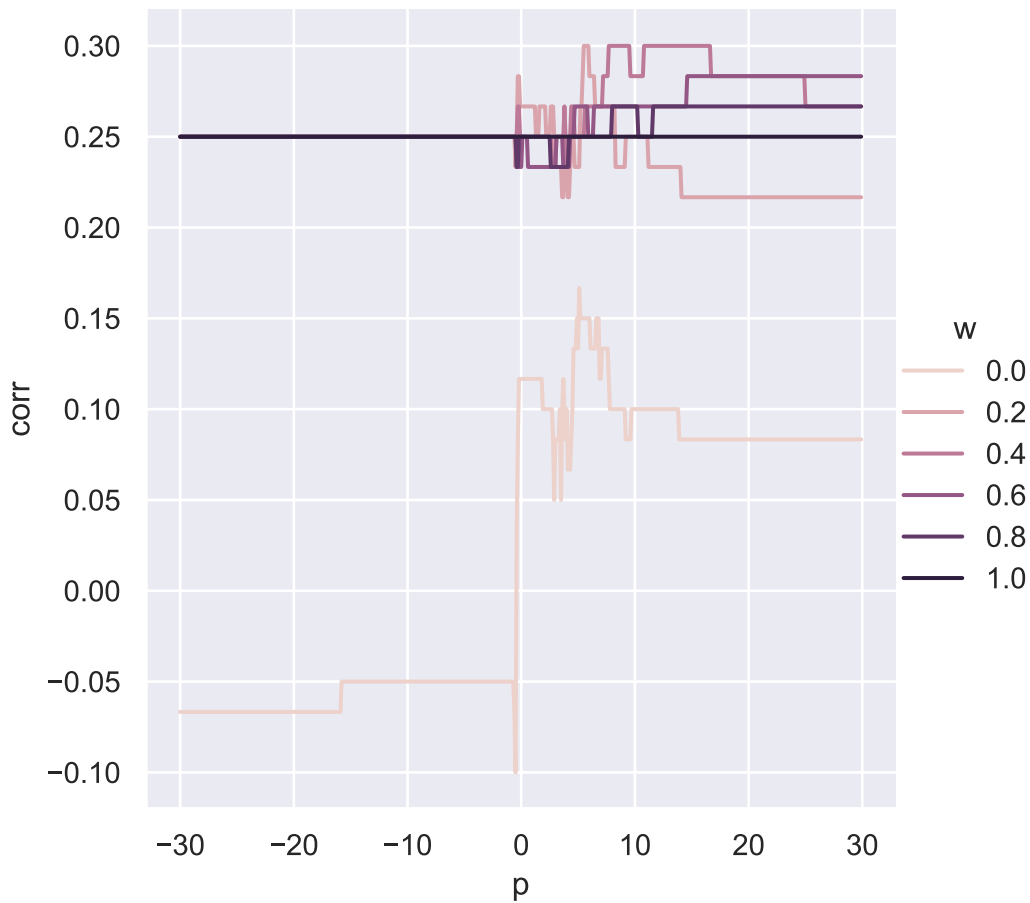

Supplement: note [file SummEval-coherence__LimeExplainer__Rouge-1__en_train_4.pdf › experiment_graphs_pdf_stratification/SummEval-coherence__LimeExplainer__Rouge-1__en_train_4.pdf]

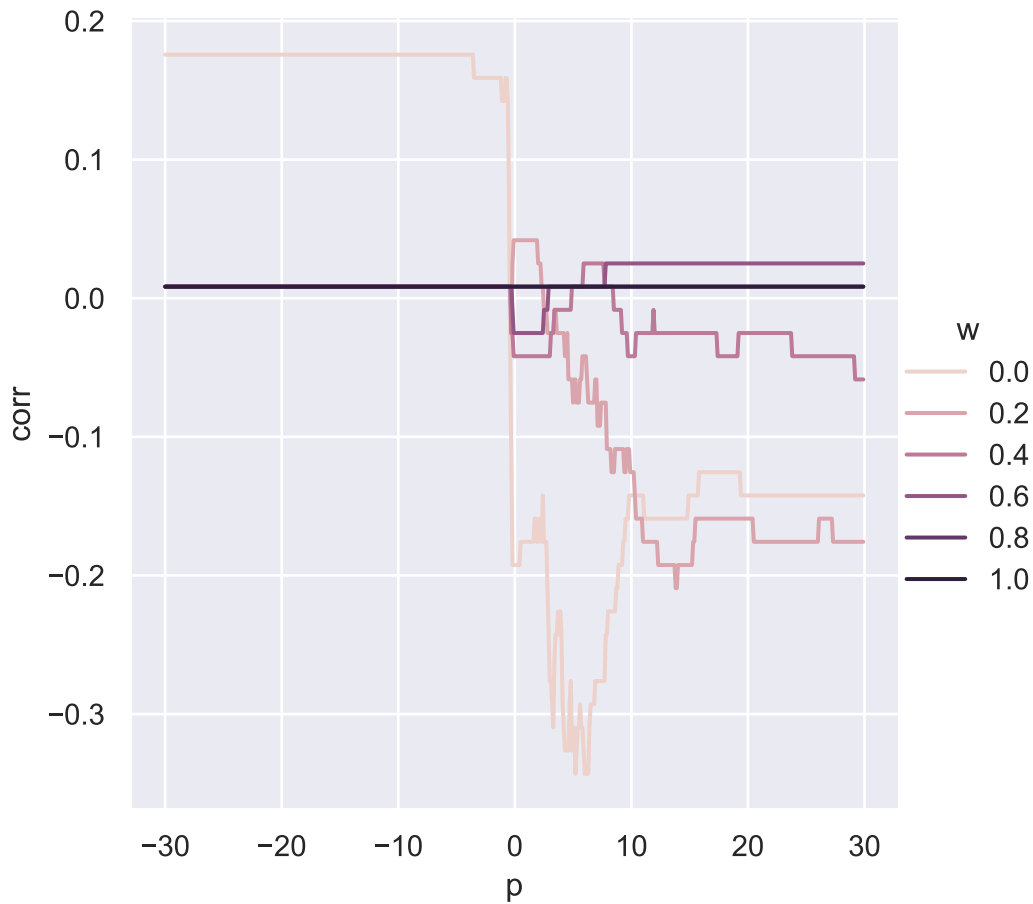

Supplement: note [file SummEval-coherence__LimeExplainer__Rouge-1__en_train_5.pdf › experiment_graphs_pdf_stratification/SummEval-coherence__LimeExplainer__Rouge-1__en_train_5.pdf]

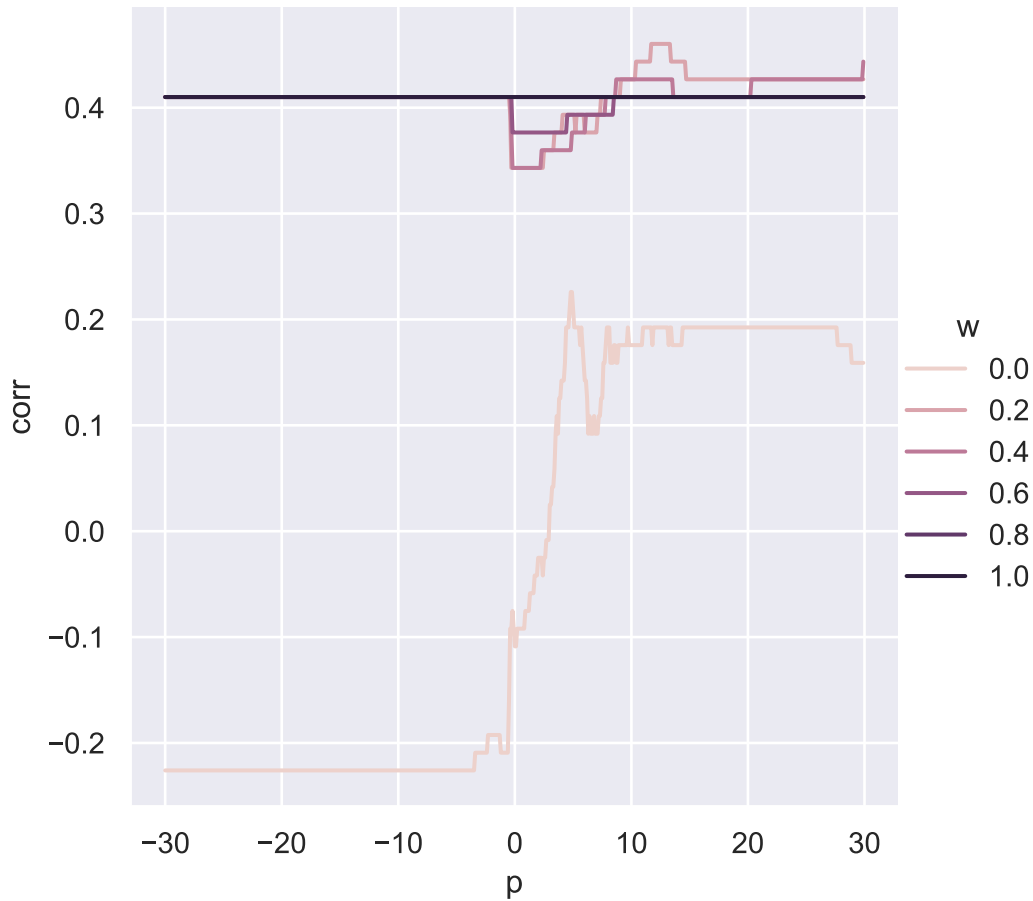

Supplement: note [file SummEval-coherence__LimeExplainer__Rouge-1__en_train_6.pdf › experiment_graphs_pdf_stratification/SummEval-coherence__LimeExplainer__Rouge-1__en_train_6.pdf]

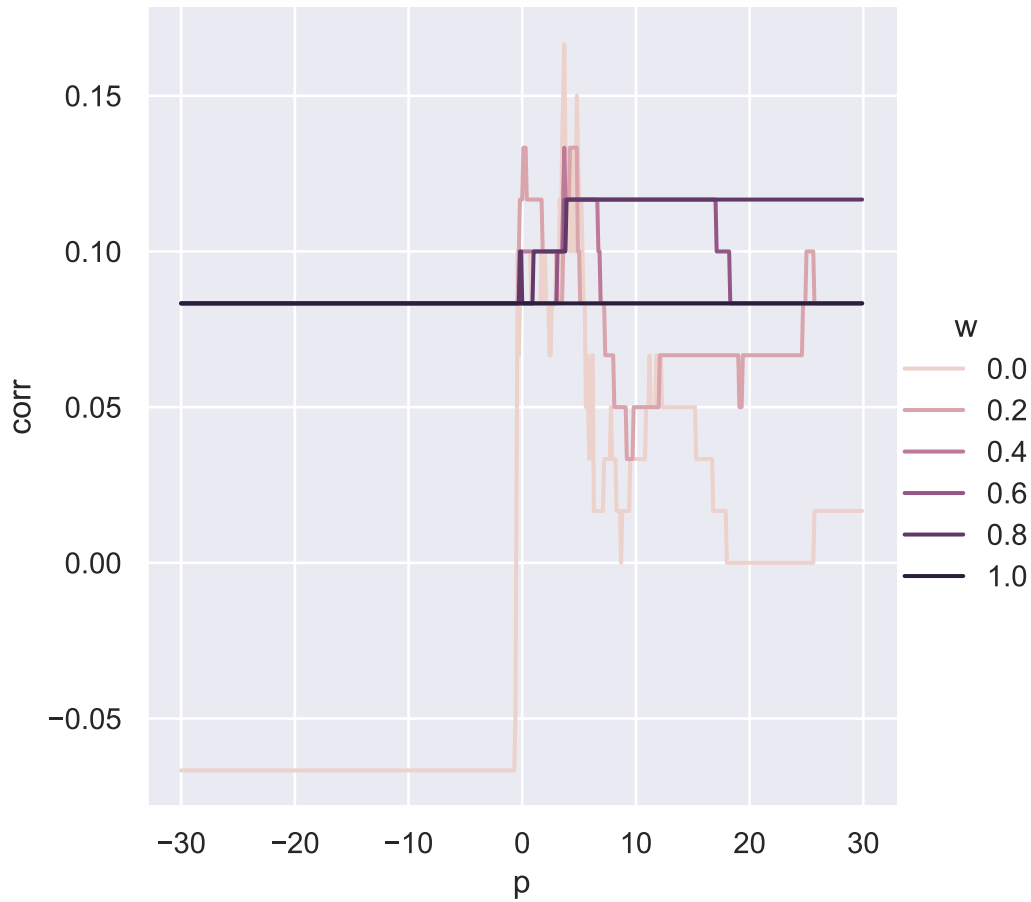

Supplement: note [file SummEval-coherence__LimeExplainer__Rouge-1__en_train_7.pdf › experiment_graphs_pdf_stratification/SummEval-coherence__LimeExplainer__Rouge-1__en_train_7.pdf]

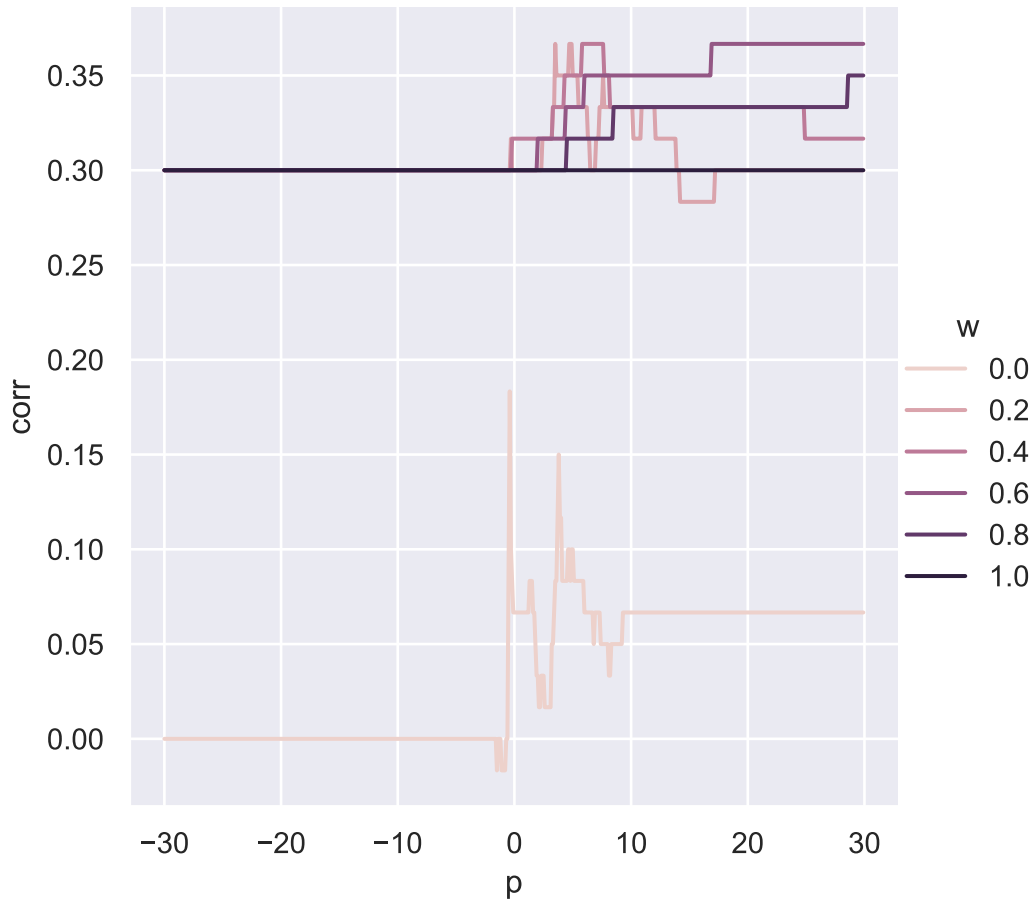

Supplement: note [file SummEval-coherence__LimeExplainer__Rouge-2__en_test_0.pdf › experiment_graphs_pdf_stratification/SummEval-coherence__LimeExplainer__Rouge-2__en_test_0.pdf]

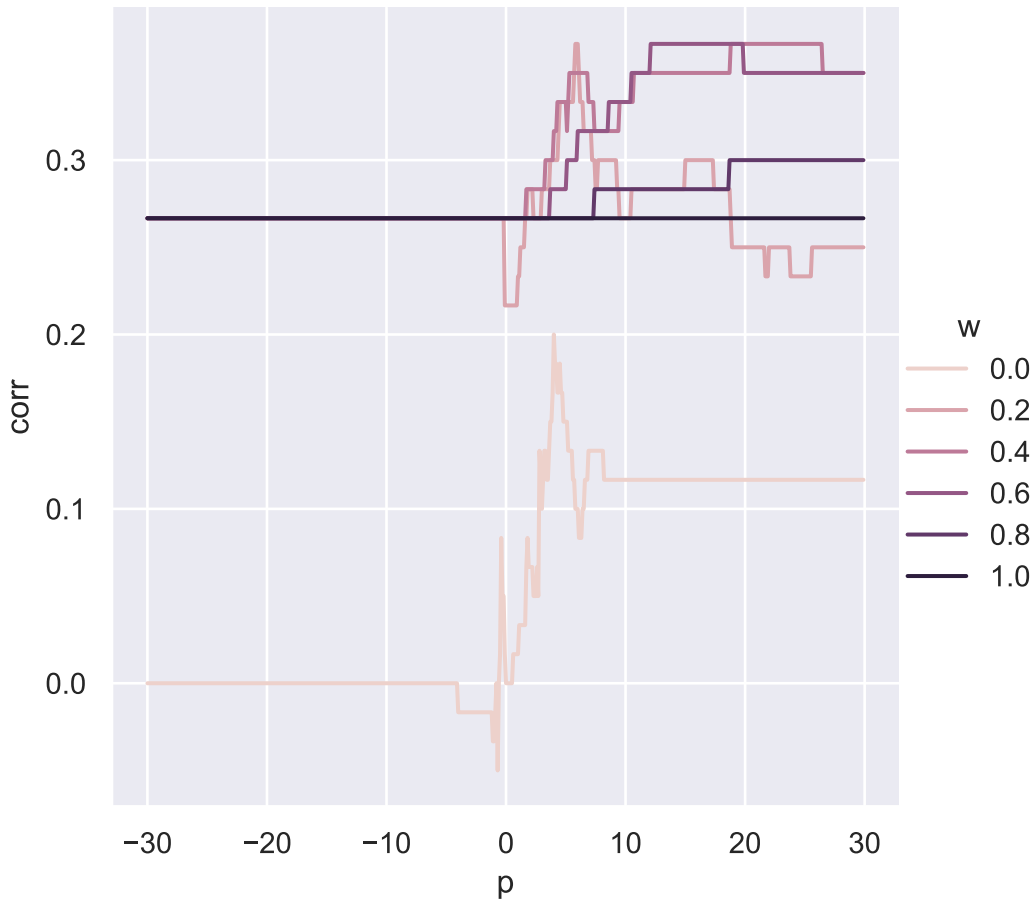

Supplement: note [file SummEval-coherence__LimeExplainer__Rouge-2__en_test_1.pdf › experiment_graphs_pdf_stratification/SummEval-coherence__LimeExplainer__Rouge-2__en_test_1.pdf]

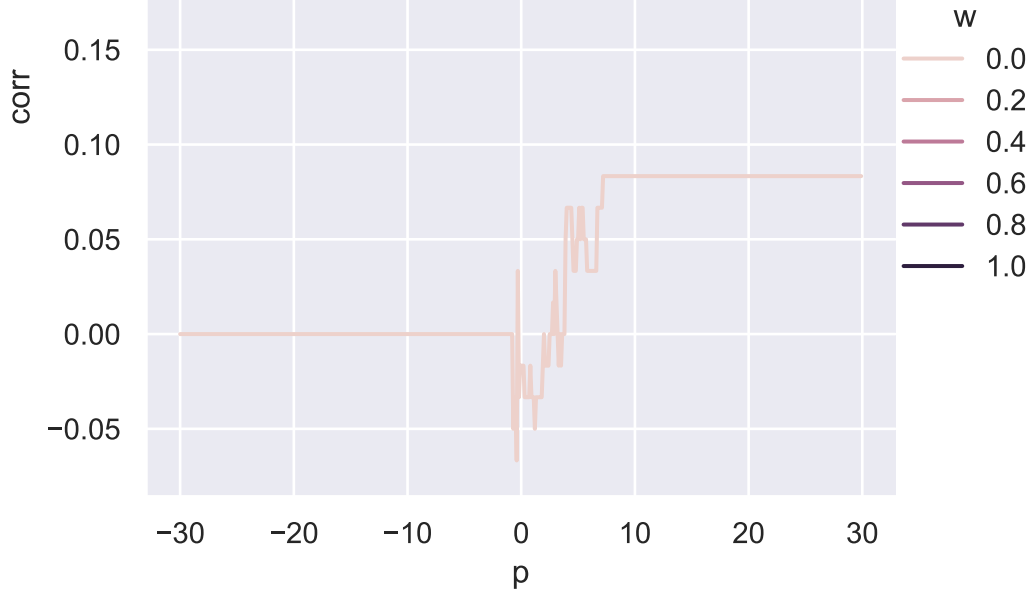

Supplement: note [file SummEval-coherence__LimeExplainer__Rouge-2__en_test_2.pdf › experiment_graphs_pdf_stratification/SummEval-coherence__LimeExplainer__Rouge-2__en_test_2.pdf]

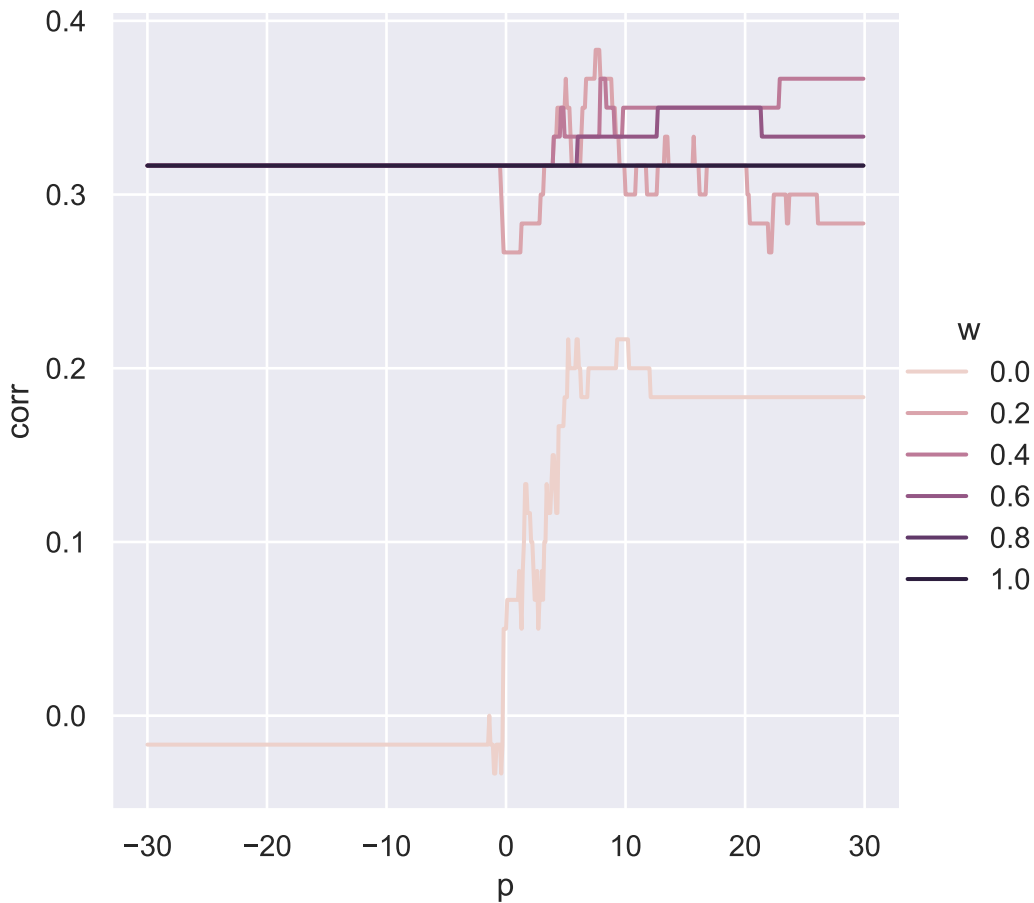

Supplement: note [file SummEval-coherence__LimeExplainer__Rouge-2__en_test_3.pdf › experiment_graphs_pdf_stratification/SummEval-coherence__LimeExplainer__Rouge-2__en_test_3.pdf]

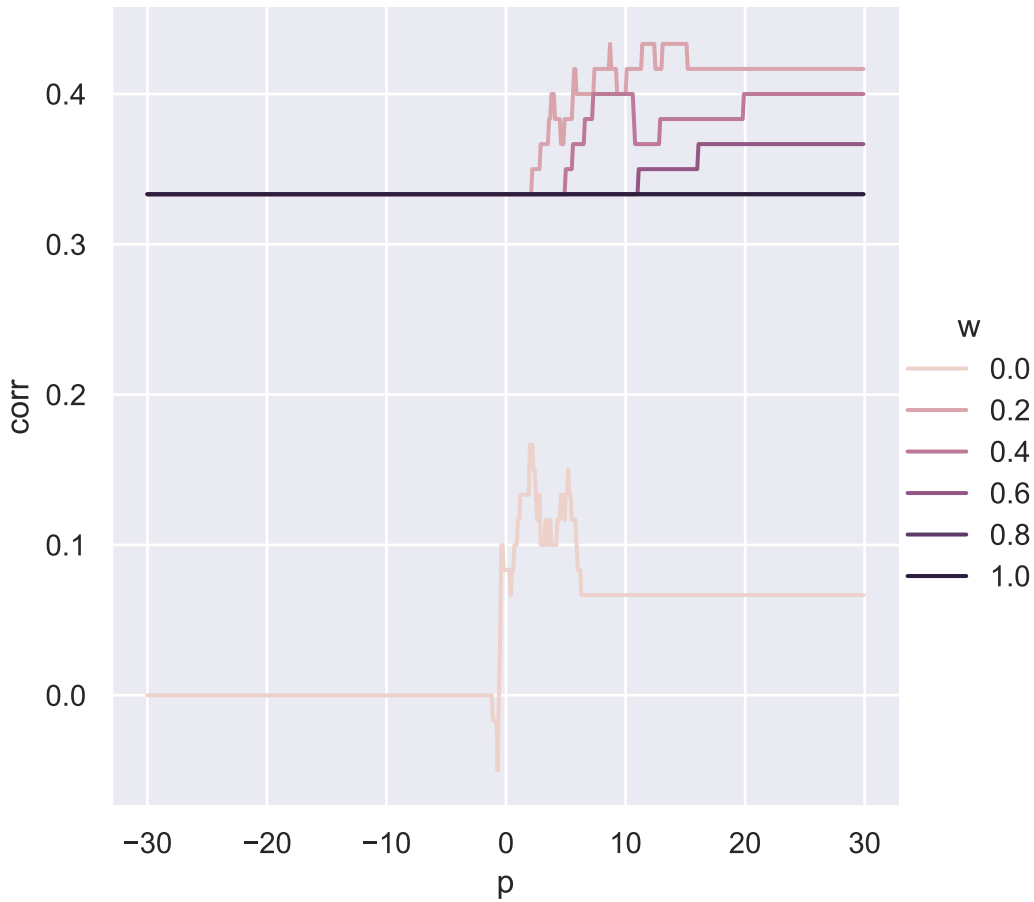

Supplement: note [file SummEval-coherence__LimeExplainer__Rouge-2__en_test_4.pdf › experiment_graphs_pdf_stratification/SummEval-coherence__LimeExplainer__Rouge-2__en_test_4.pdf]

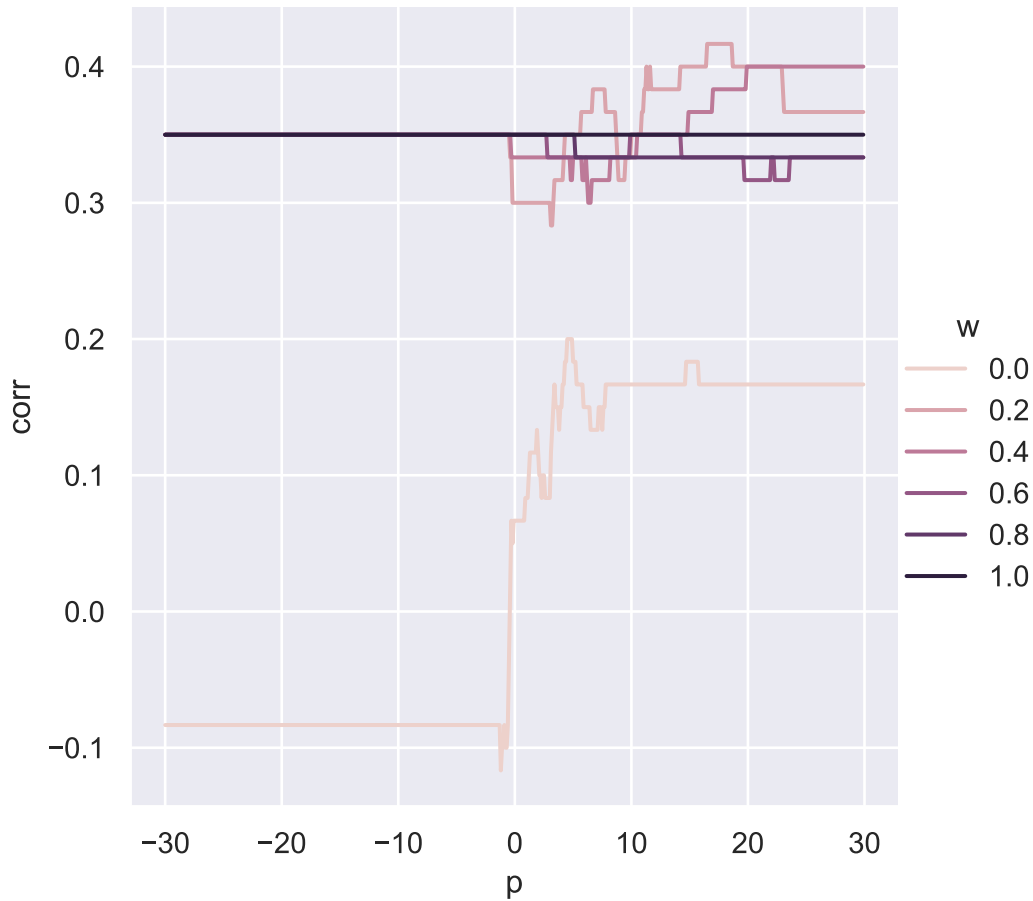

Supplement: note [file SummEval-coherence__LimeExplainer__Rouge-2__en_test_5.pdf › experiment_graphs_pdf_stratification/SummEval-coherence__LimeExplainer__Rouge-2__en_test_5.pdf]

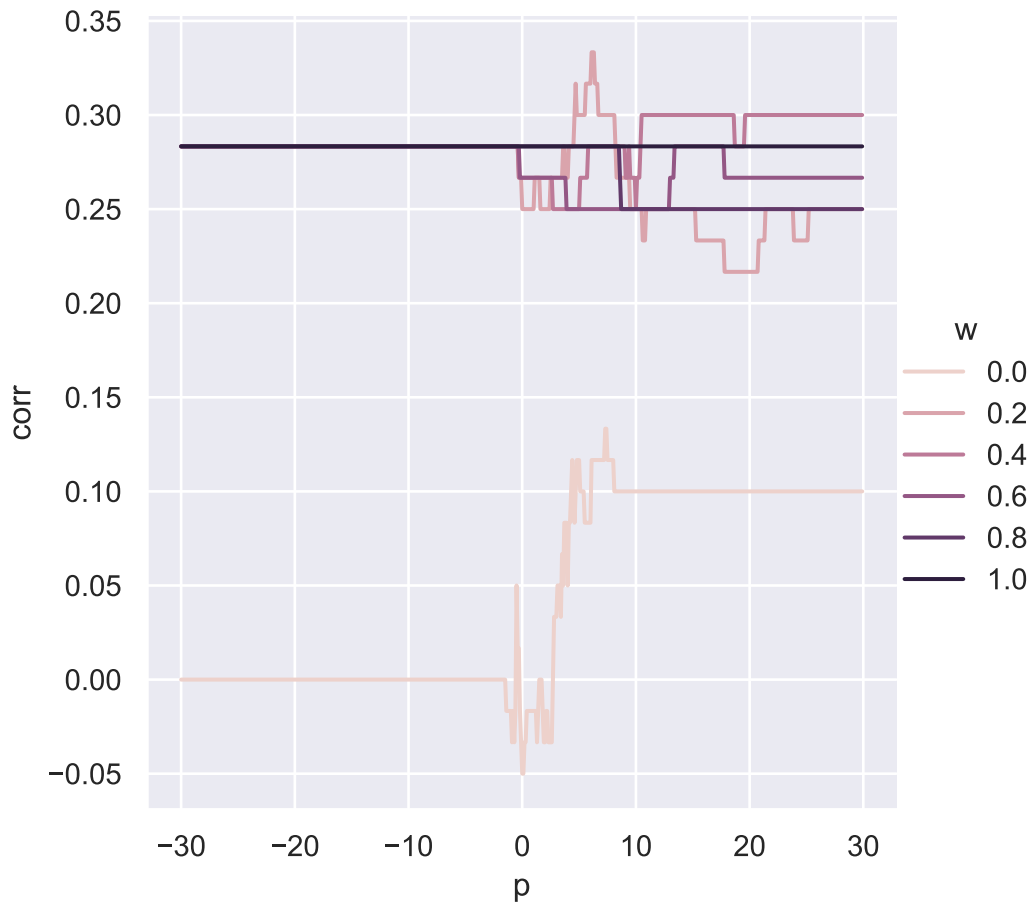

Supplement: note [file SummEval-coherence__LimeExplainer__Rouge-2__en_test_6.pdf › experiment_graphs_pdf_stratification/SummEval-coherence__LimeExplainer__Rouge-2__en_test_6.pdf]

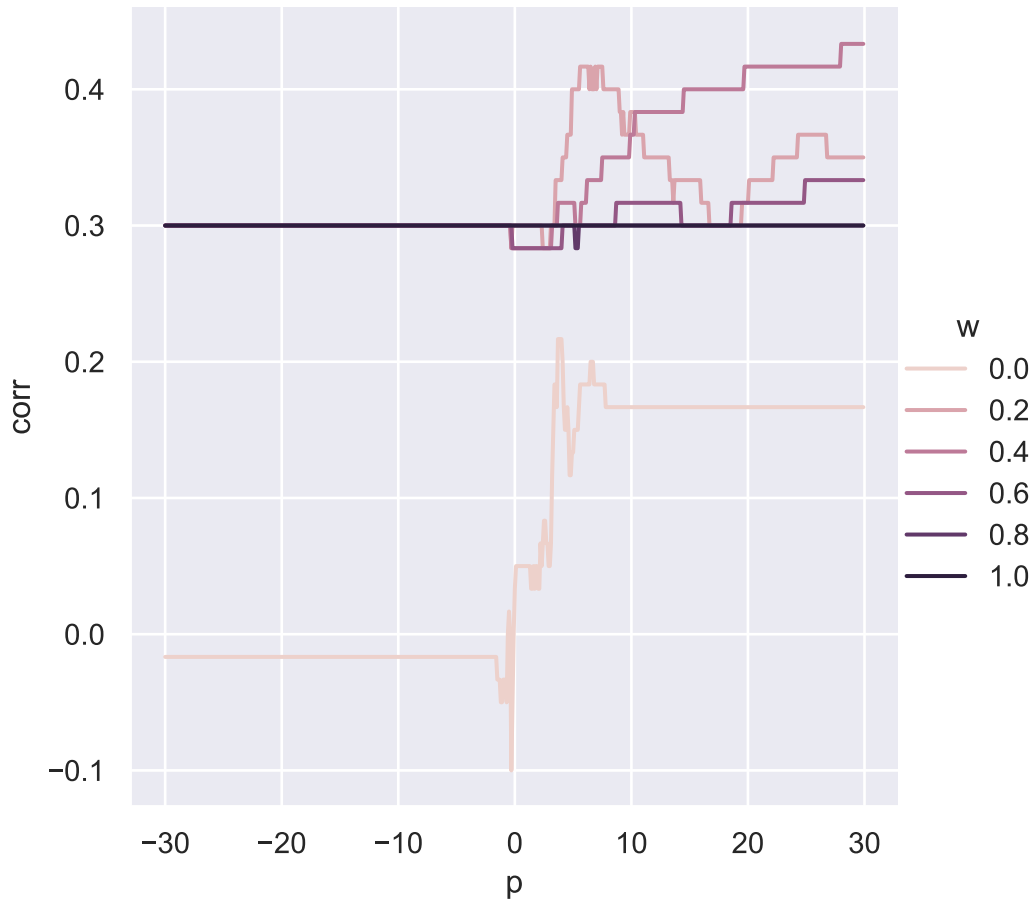

Supplement: note [file SummEval-coherence__LimeExplainer__Rouge-2__en_test_7.pdf › experiment_graphs_pdf_stratification/SummEval-coherence__LimeExplainer__Rouge-2__en_test_7.pdf]

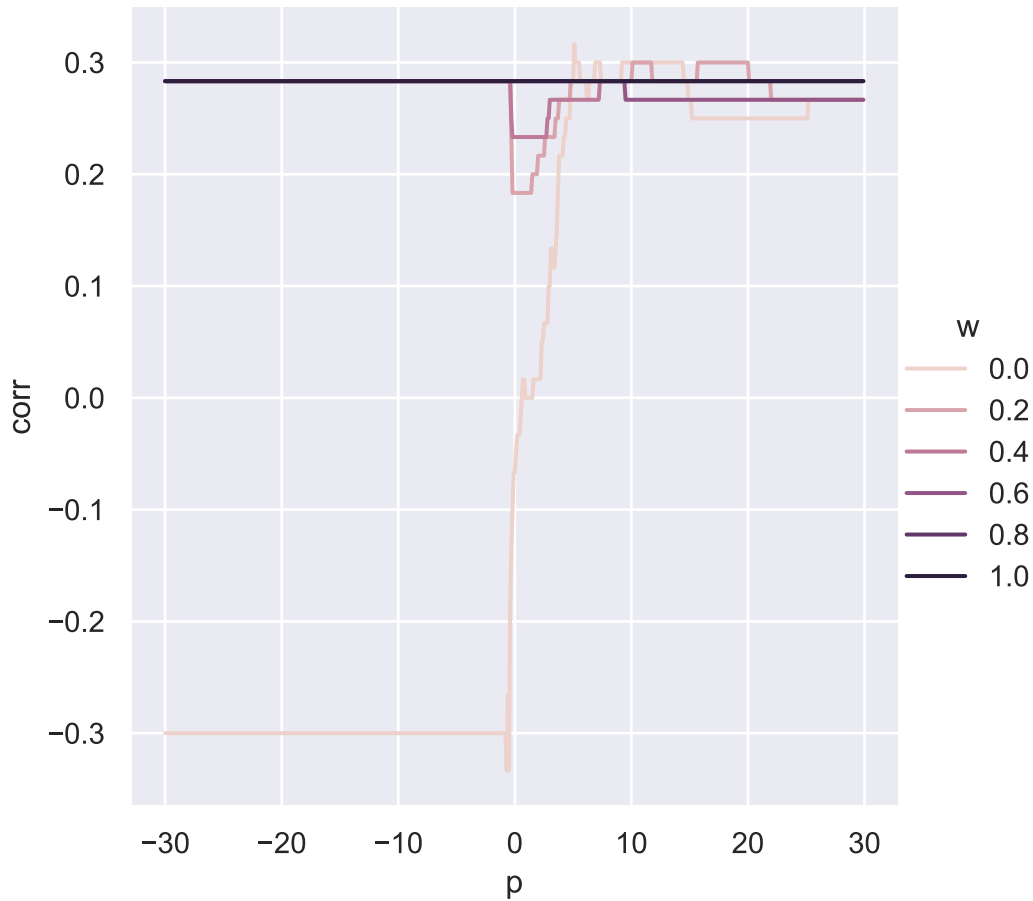

Supplement: note [file SummEval-coherence__LimeExplainer__Rouge-2__en_train_0.pdf › experiment_graphs_pdf_stratification/SummEval-coherence__LimeExplainer__Rouge-2__en_train_0.pdf]

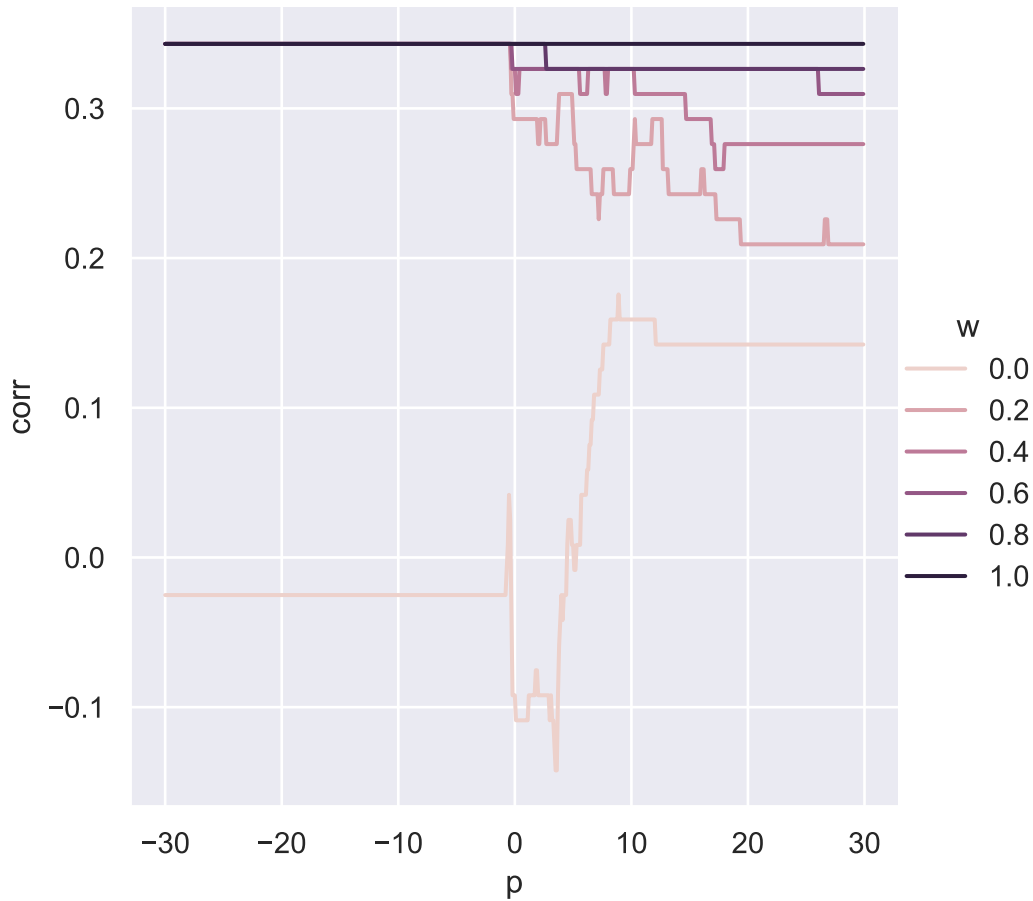

Supplement: note [file SummEval-coherence__LimeExplainer__Rouge-2__en_train_1.pdf › experiment_graphs_pdf_stratification/SummEval-coherence__LimeExplainer__Rouge-2__en_train_1.pdf]

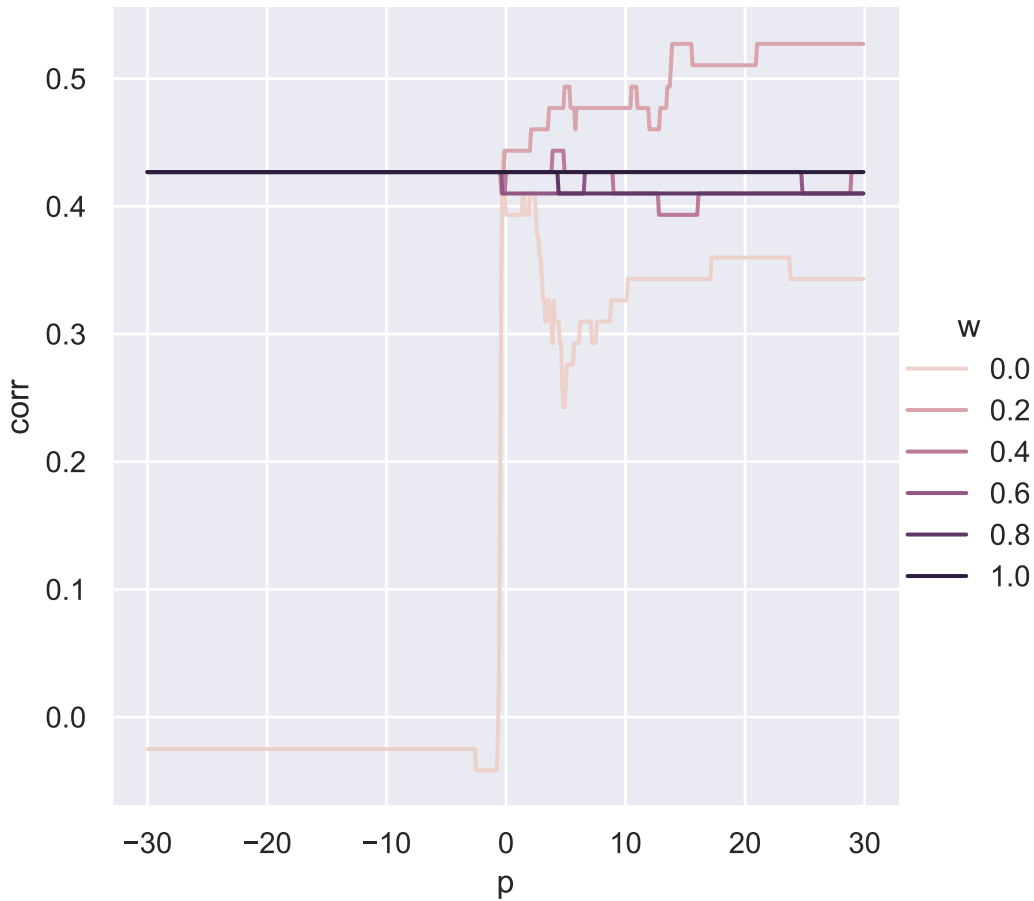

Supplement: note [file SummEval-coherence__LimeExplainer__Rouge-2__en_train_2.pdf › experiment_graphs_pdf_stratification/SummEval-coherence__LimeExplainer__Rouge-2__en_train_2.pdf]

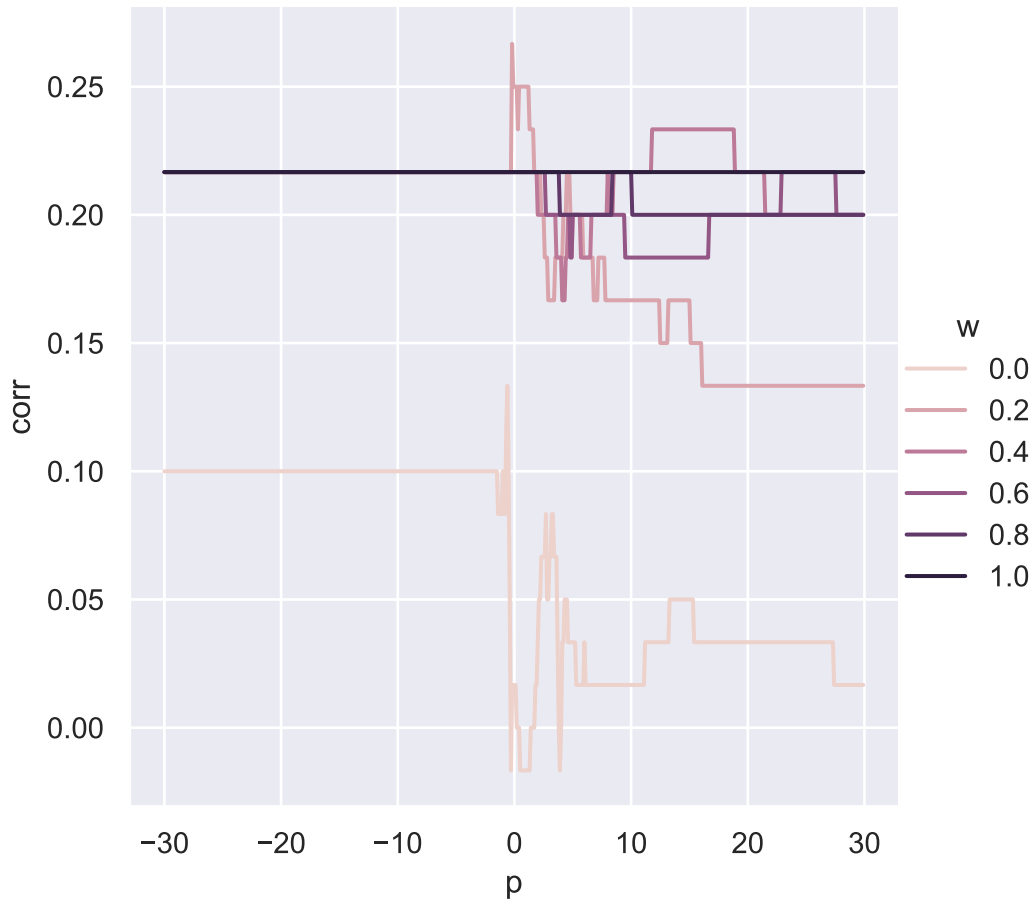

Supplement: note [file SummEval-coherence__LimeExplainer__Rouge-2__en_train_3.pdf › experiment_graphs_pdf_stratification/SummEval-coherence__LimeExplainer__Rouge-2__en_train_3.pdf]

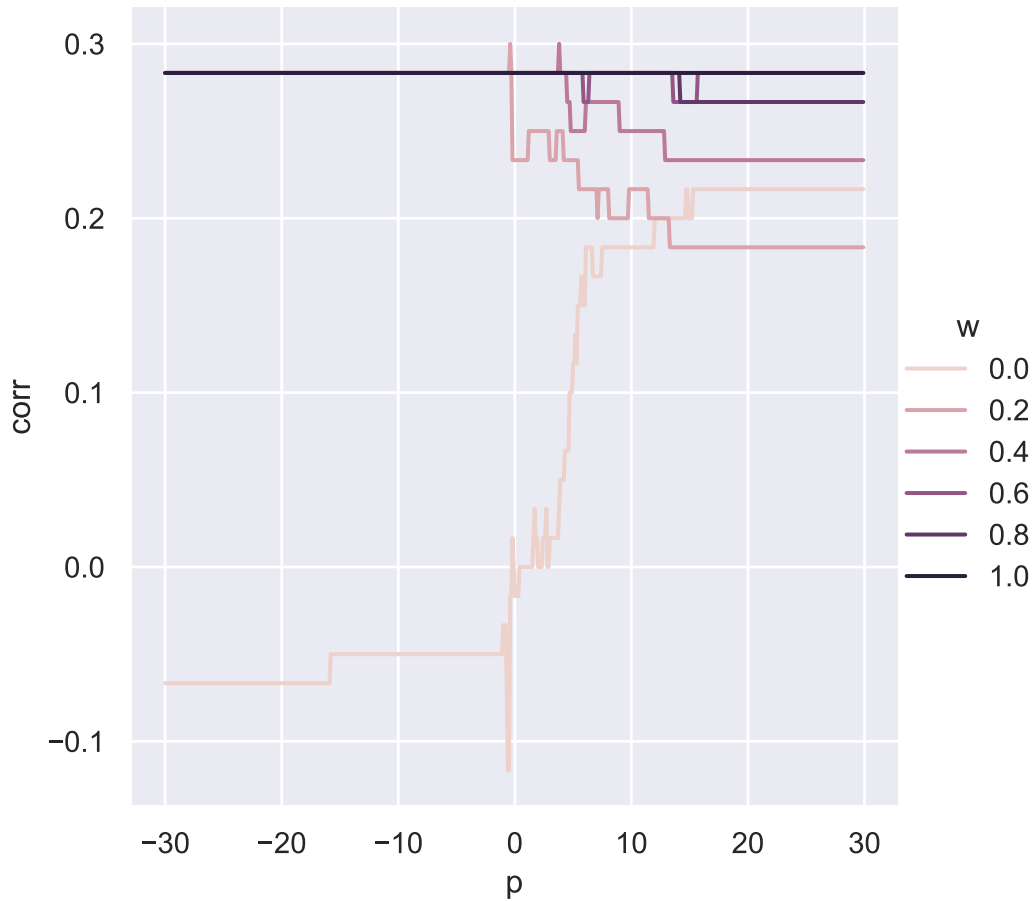

Supplement: note [file SummEval-coherence__LimeExplainer__Rouge-2__en_train_4.pdf › experiment_graphs_pdf_stratification/SummEval-coherence__LimeExplainer__Rouge-2__en_train_4.pdf]

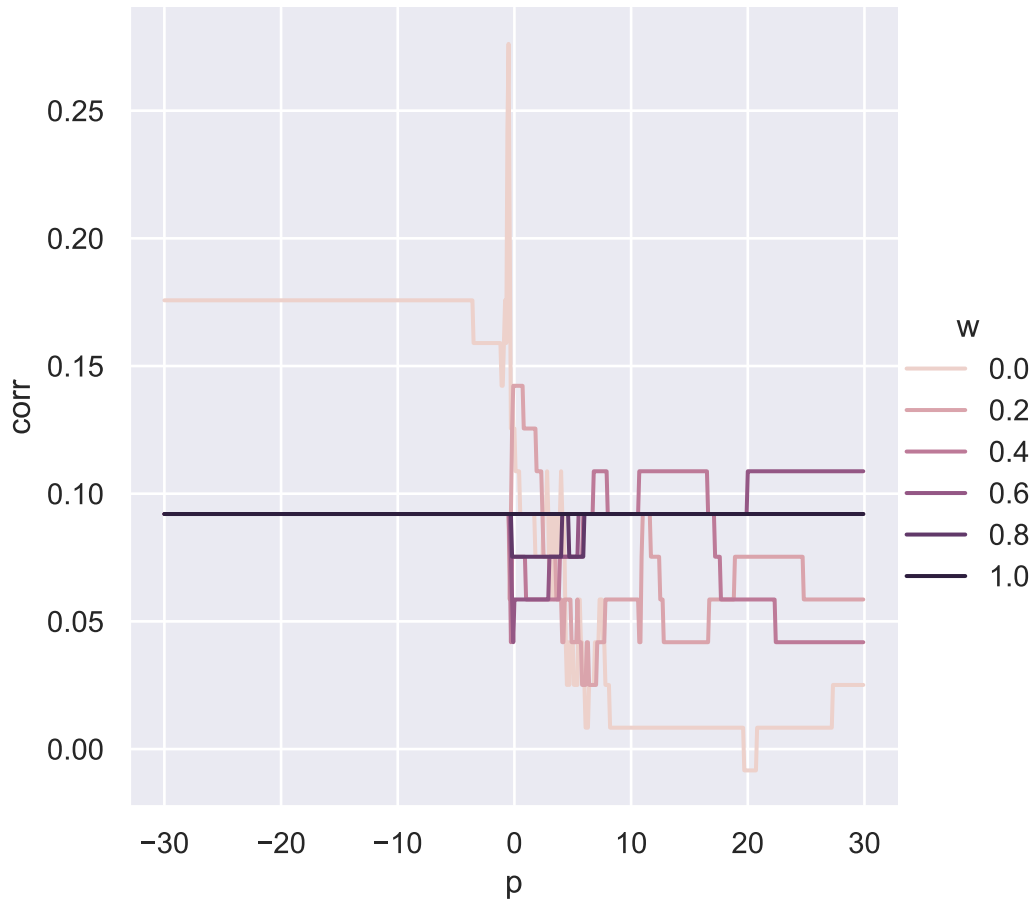

Supplement: note [file SummEval-coherence__LimeExplainer__Rouge-2__en_train_5.pdf › experiment_graphs_pdf_stratification/SummEval-coherence__LimeExplainer__Rouge-2__en_train_5.pdf]

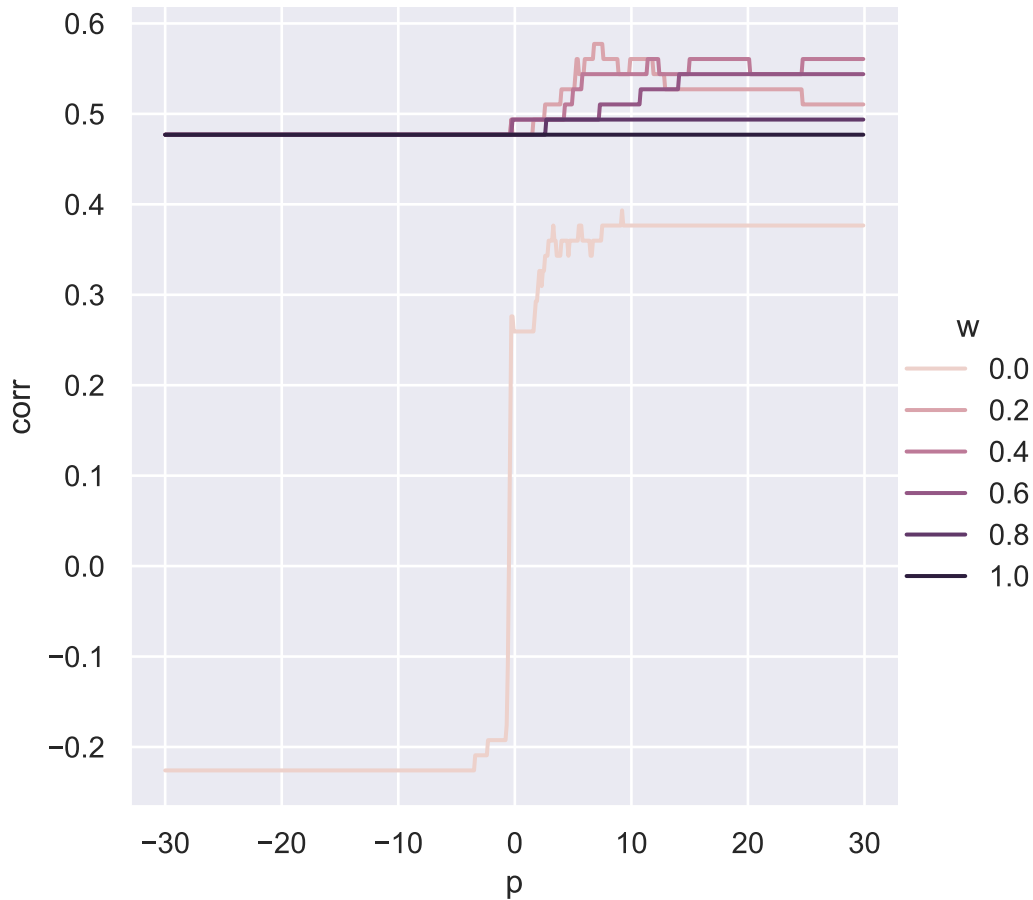

Supplement: note [file SummEval-coherence__LimeExplainer__Rouge-2__en_train_6.pdf › experiment_graphs_pdf_stratification/SummEval-coherence__LimeExplainer__Rouge-2__en_train_6.pdf]

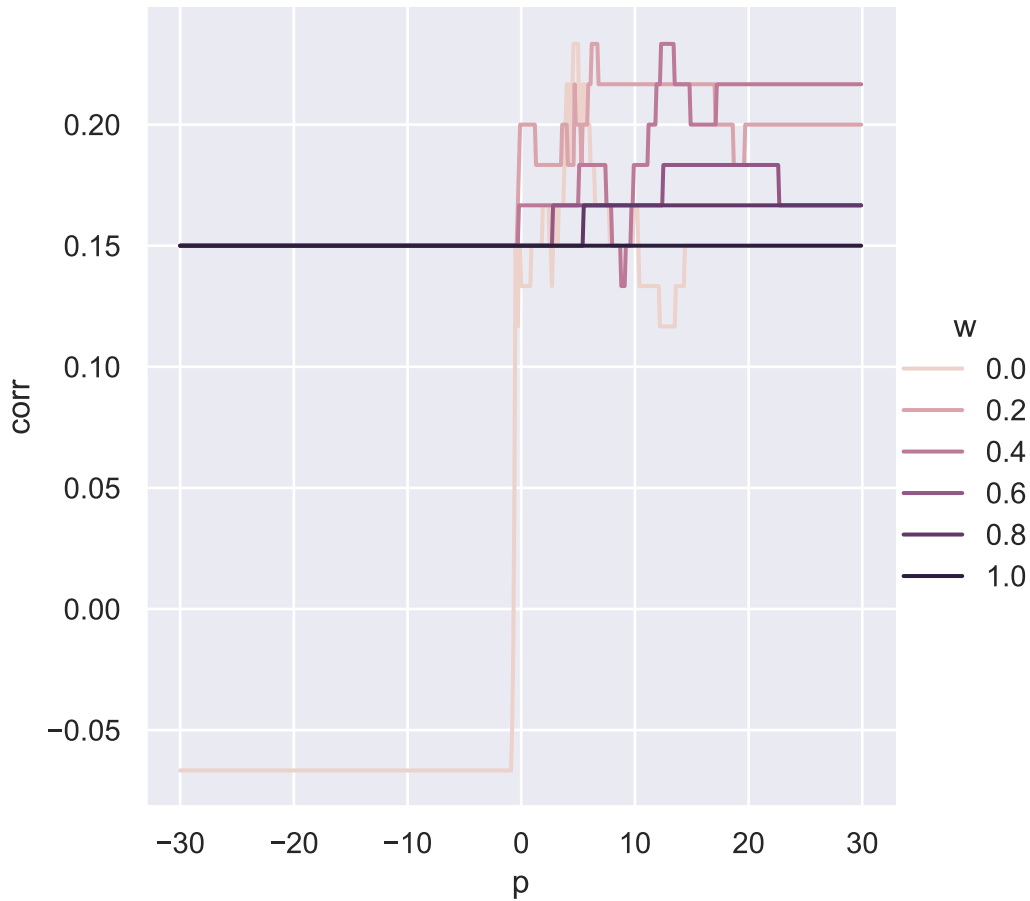

Supplement: note [file SummEval-coherence__LimeExplainer__Rouge-2__en_train_7.pdf › experiment_graphs_pdf_stratification/SummEval-coherence__LimeExplainer__Rouge-2__en_train_7.pdf]

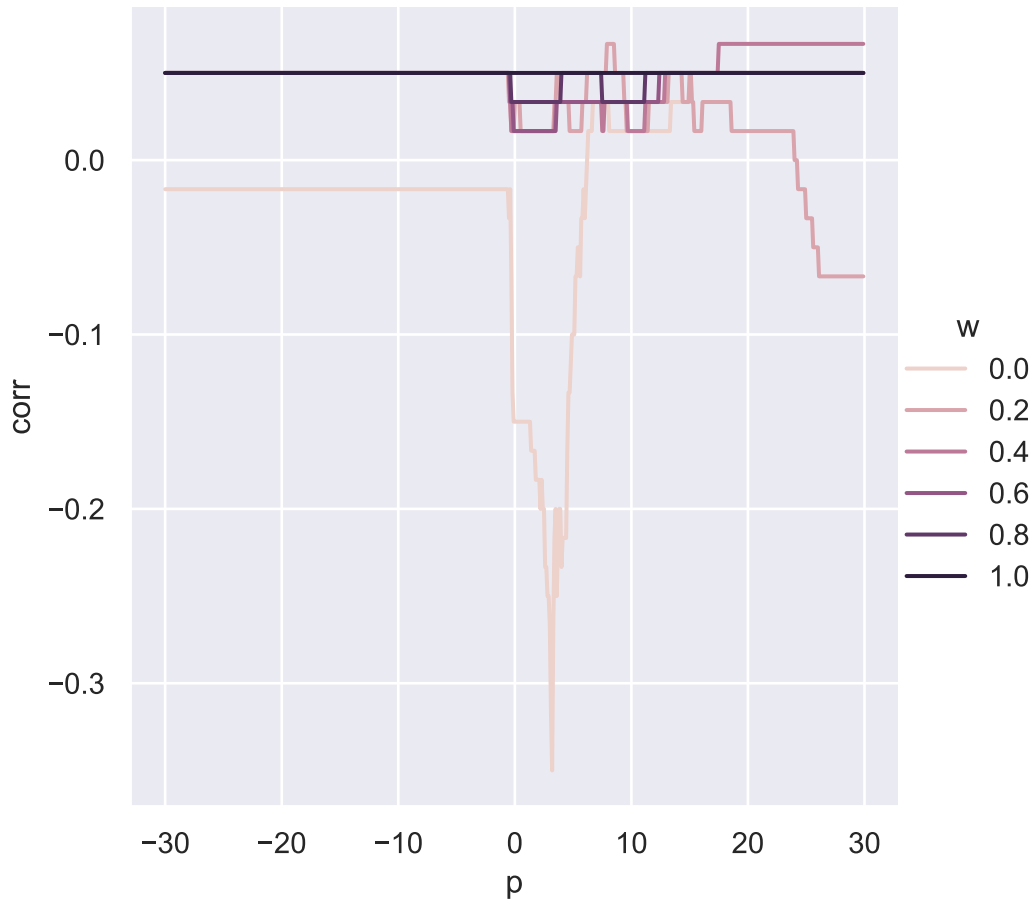

Supplement: note [file SummEval-coherence__LimeExplainer__Rouge-l__en_test_0.pdf › experiment_graphs_pdf_stratification/SummEval-coherence__LimeExplainer__Rouge-l__en_test_0.pdf]

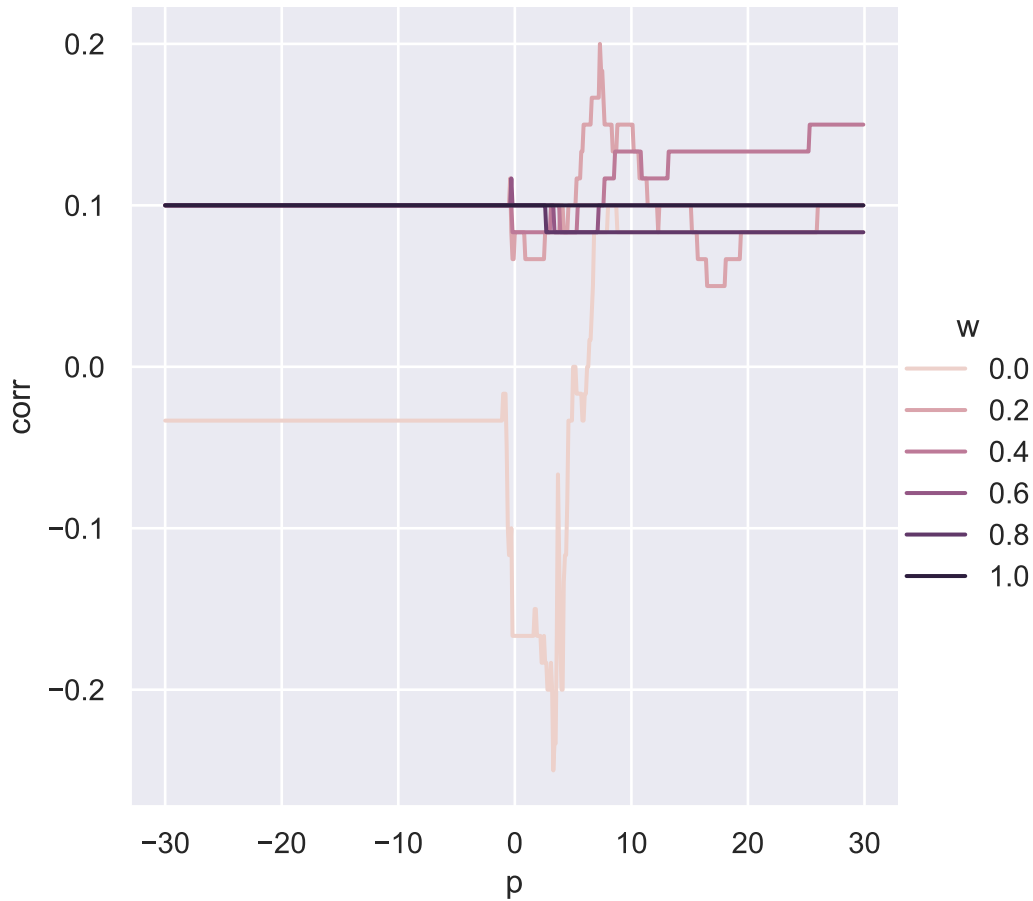

Supplement: note [file SummEval-coherence__LimeExplainer__Rouge-l__en_test_1.pdf › experiment_graphs_pdf_stratification/SummEval-coherence__LimeExplainer__Rouge-l__en_test_1.pdf]

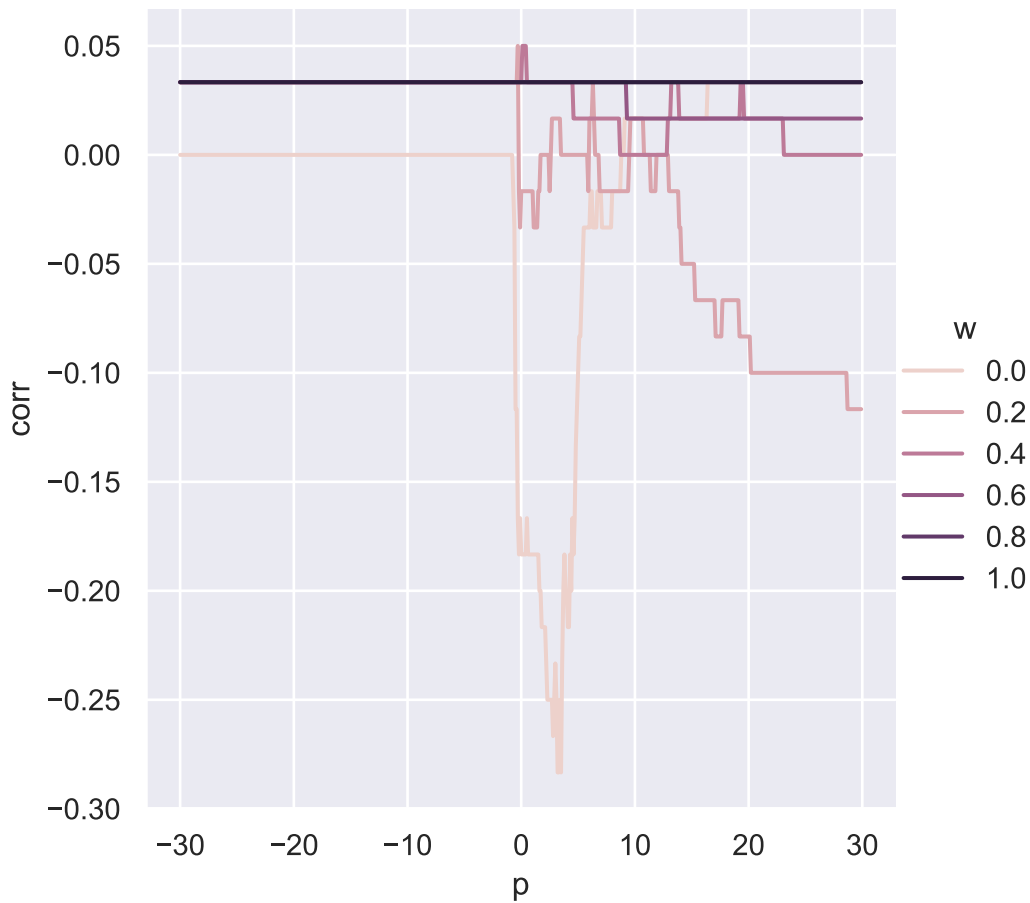

Supplement: note [file SummEval-coherence__LimeExplainer__Rouge-l__en_test_2.pdf › experiment_graphs_pdf_stratification/SummEval-coherence__LimeExplainer__Rouge-l__en_test_2.pdf]

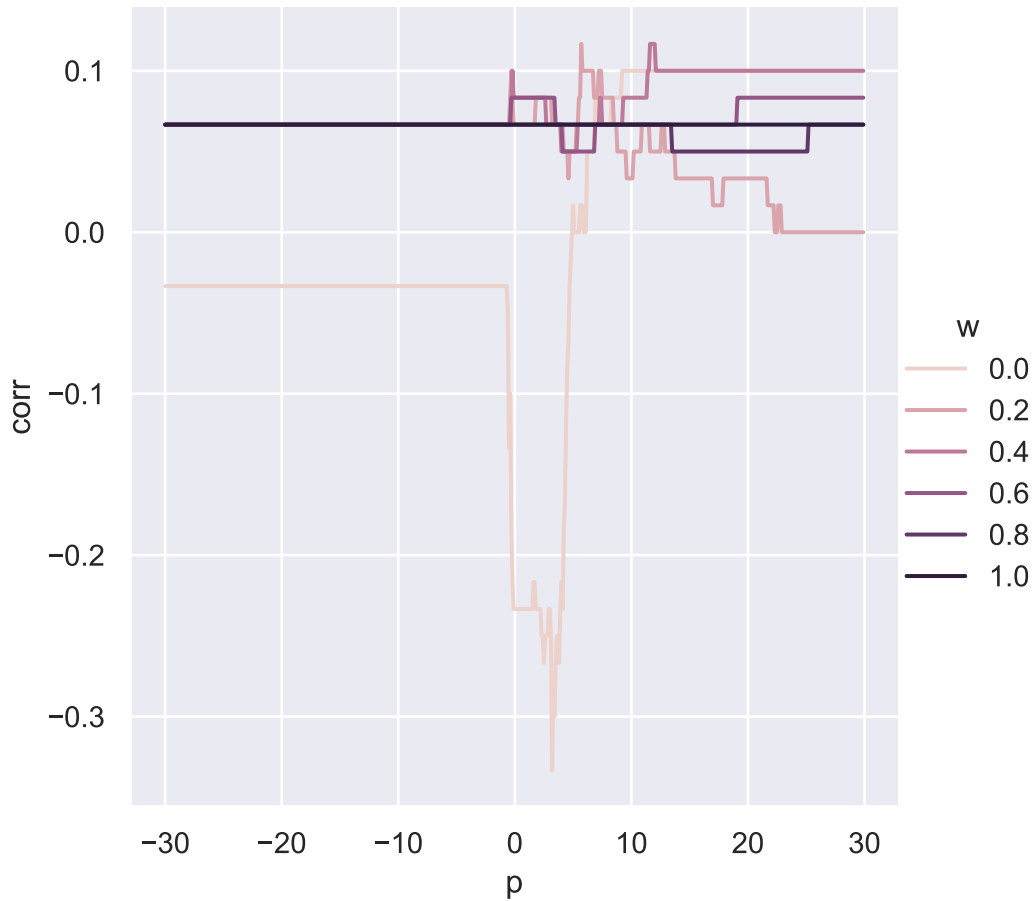

Supplement: note [file SummEval-coherence__LimeExplainer__Rouge-l__en_test_3.pdf › experiment_graphs_pdf_stratification/SummEval-coherence__LimeExplainer__Rouge-l__en_test_3.pdf]

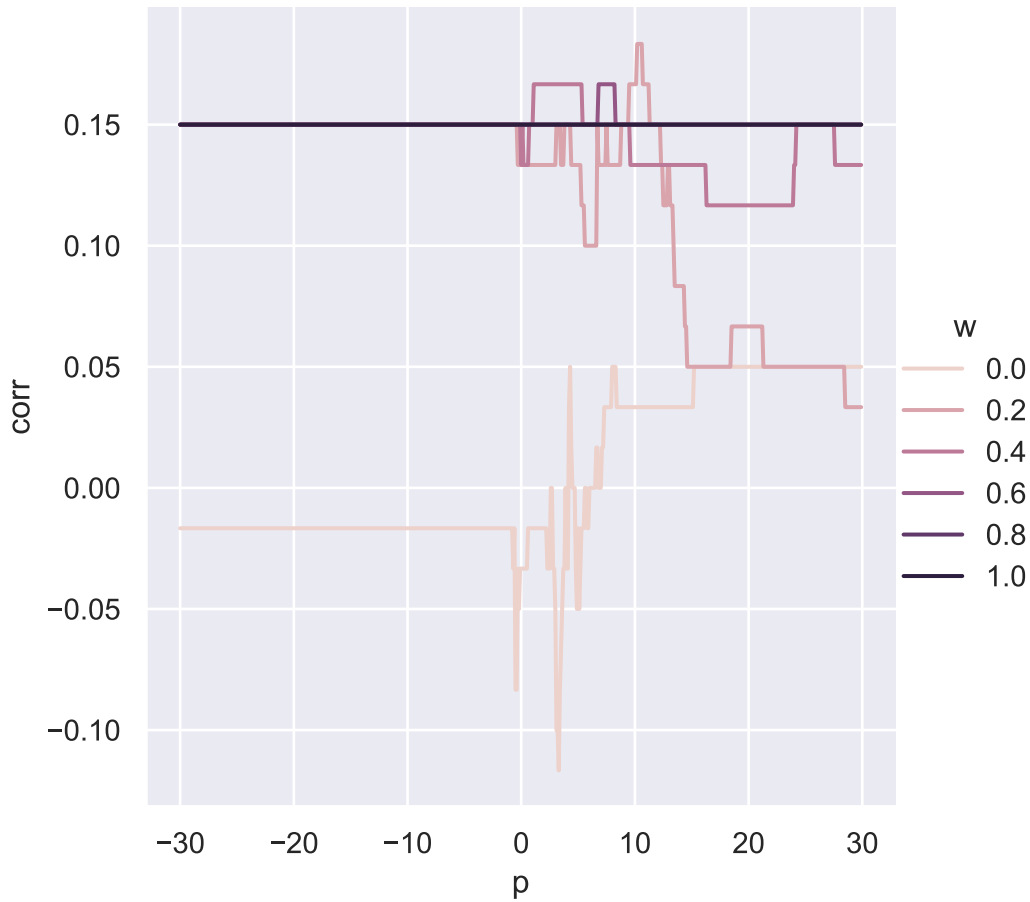

Supplement: note [file SummEval-coherence__LimeExplainer__Rouge-l__en_test_4.pdf › experiment_graphs_pdf_stratification/SummEval-coherence__LimeExplainer__Rouge-l__en_test_4.pdf]

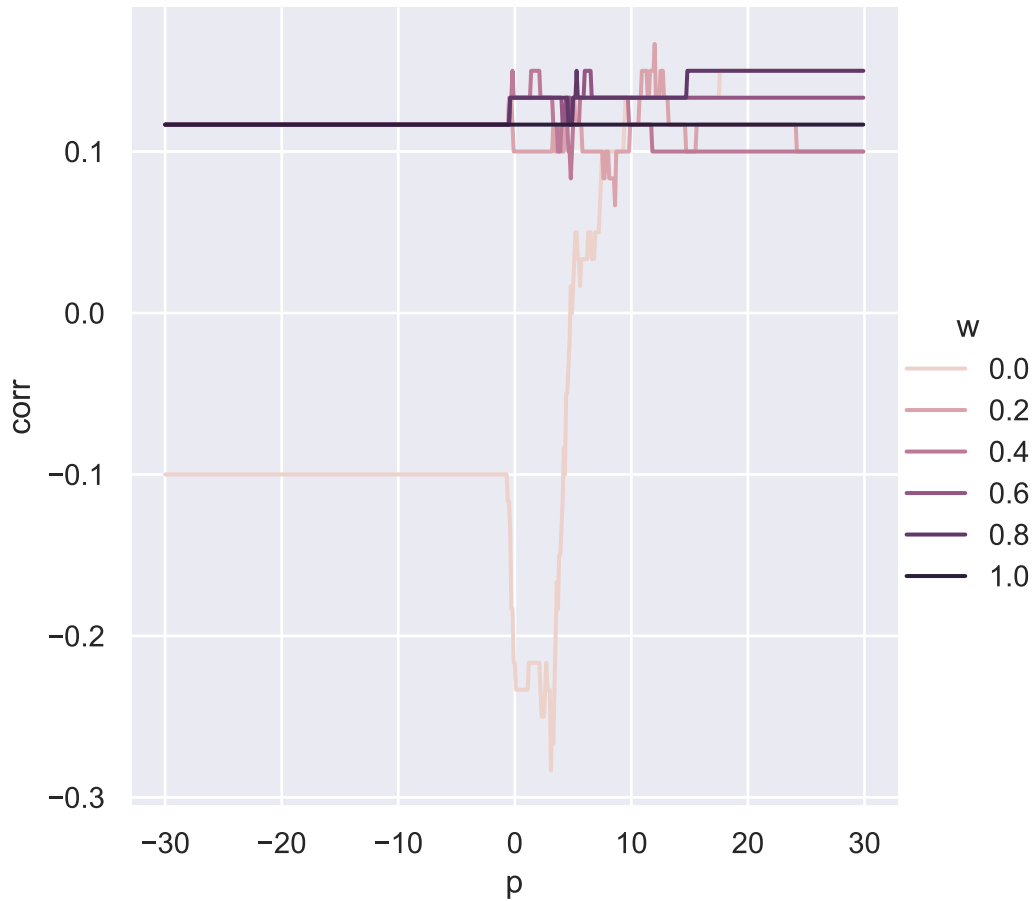

Supplement: note [file SummEval-coherence__LimeExplainer__Rouge-l__en_test_5.pdf › experiment_graphs_pdf_stratification/SummEval-coherence__LimeExplainer__Rouge-l__en_test_5.pdf]

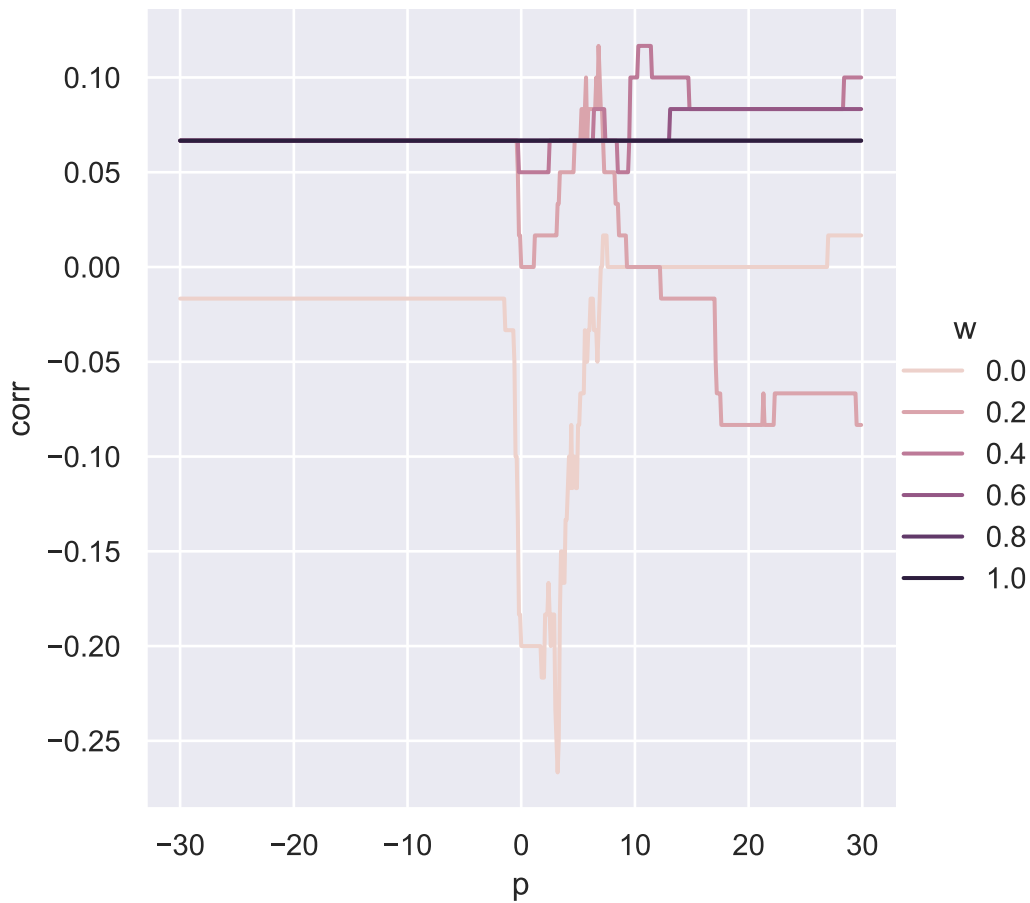

Supplement: note [file SummEval-coherence__LimeExplainer__Rouge-l__en_test_6.pdf › experiment_graphs_pdf_stratification/SummEval-coherence__LimeExplainer__Rouge-l__en_test_6.pdf]

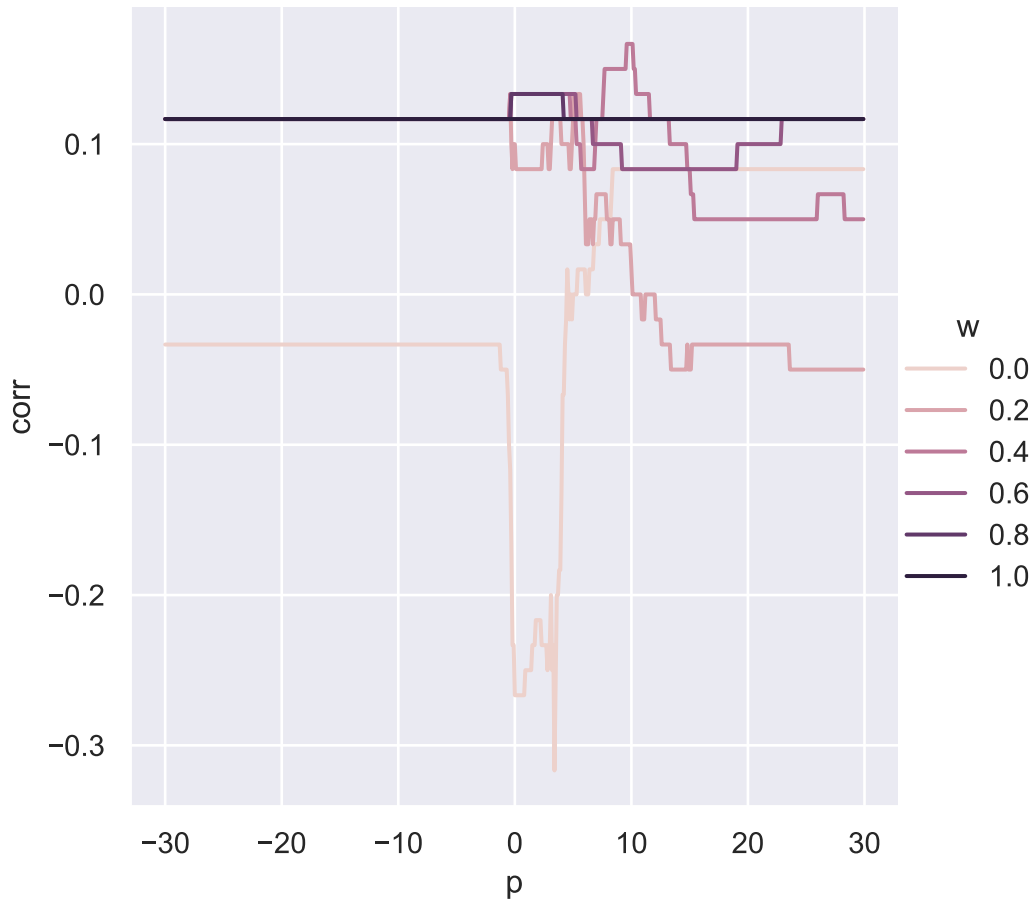

Supplement: note [file SummEval-coherence__LimeExplainer__Rouge-l__en_test_7.pdf › experiment_graphs_pdf_stratification/SummEval-coherence__LimeExplainer__Rouge-l__en_test_7.pdf]

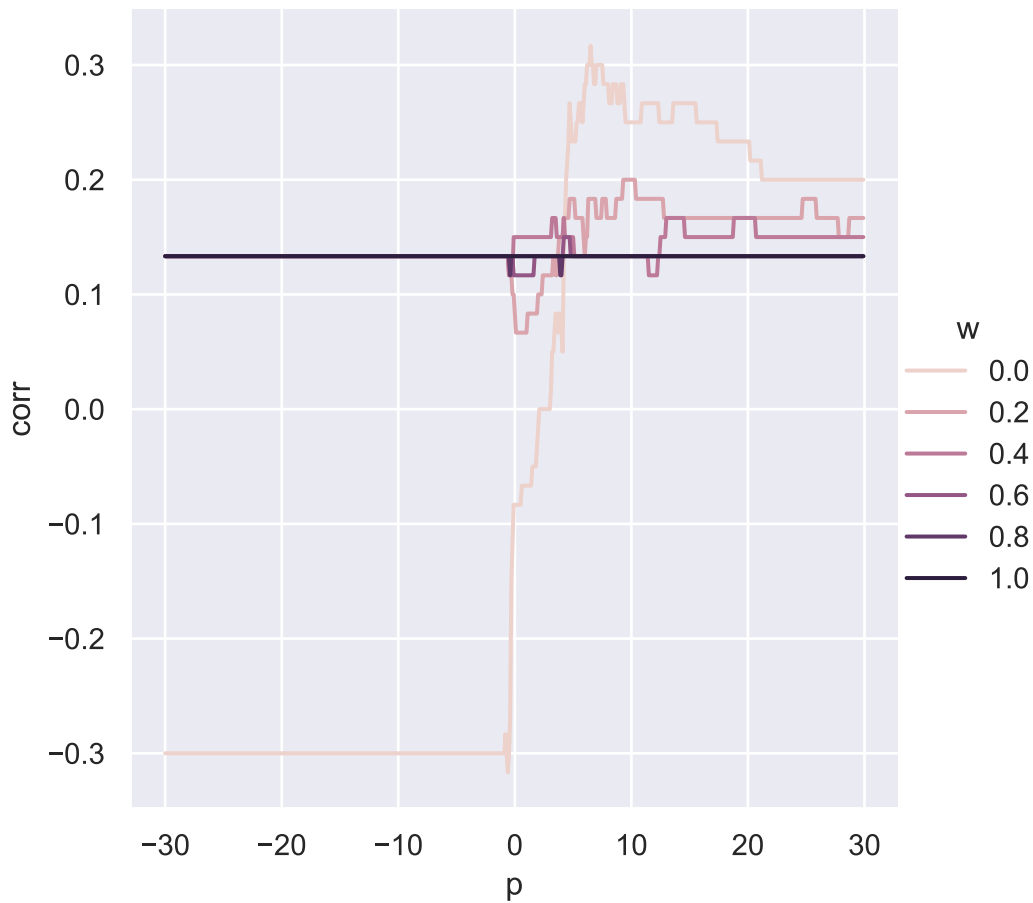

Supplement: note [file SummEval-coherence__LimeExplainer__Rouge-l__en_train_0.pdf › experiment_graphs_pdf_stratification/SummEval-coherence__LimeExplainer__Rouge-l__en_train_0.pdf]

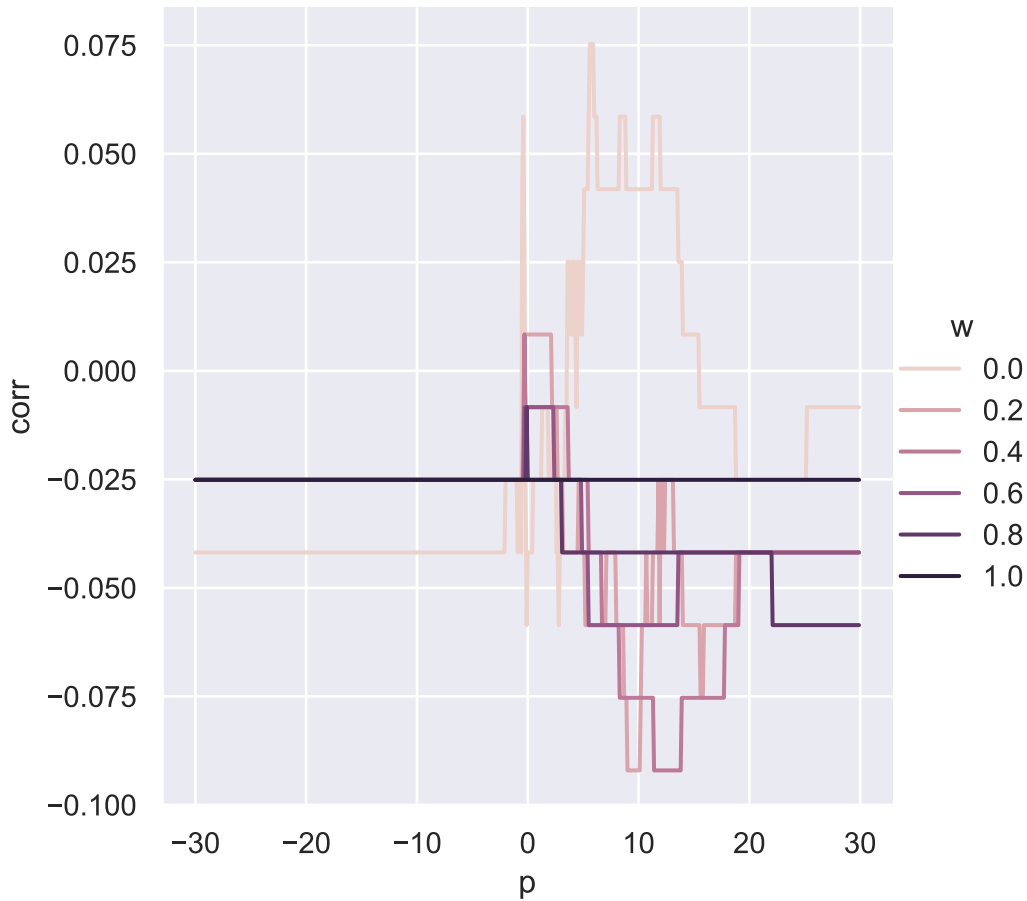

Supplement: note [file SummEval-coherence__LimeExplainer__Rouge-l__en_train_1.pdf › experiment_graphs_pdf_stratification/SummEval-coherence__LimeExplainer__Rouge-l__en_train_1.pdf]

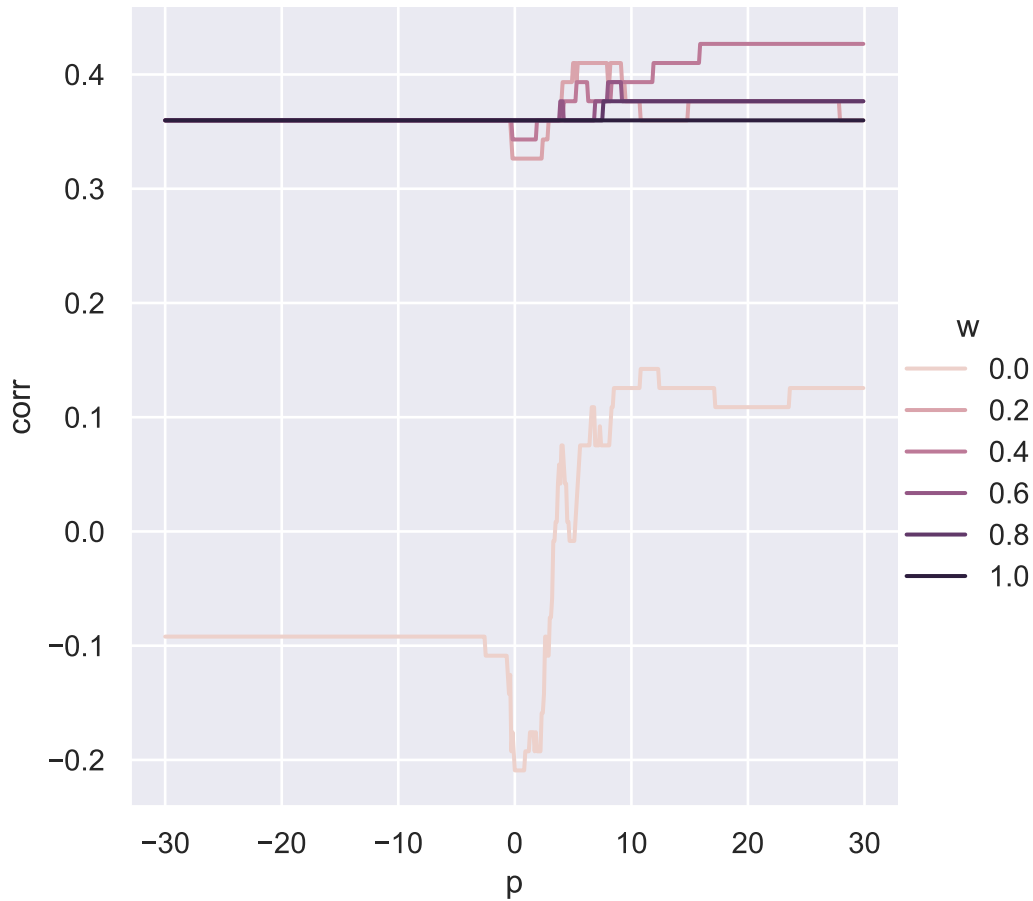

Supplement: note [file SummEval-coherence__LimeExplainer__Rouge-l__en_train_2.pdf › experiment_graphs_pdf_stratification/SummEval-coherence__LimeExplainer__Rouge-l__en_train_2.pdf]

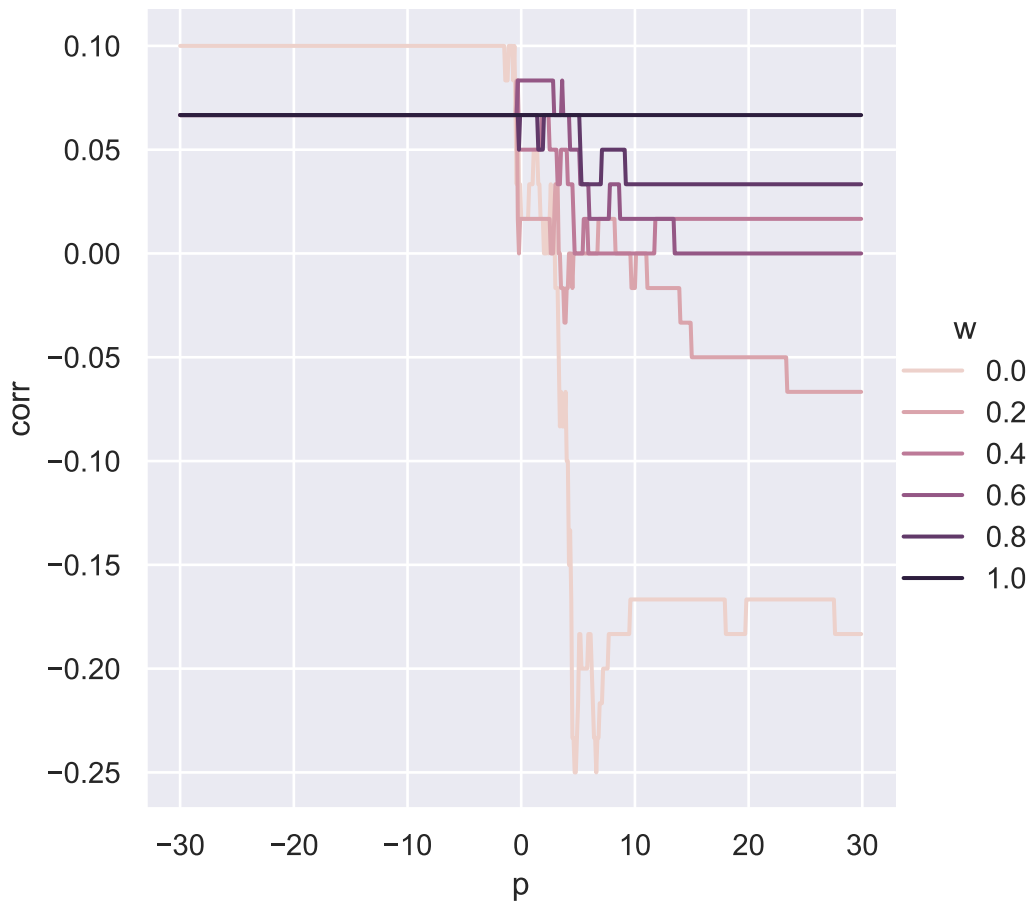

Supplement: note [file SummEval-coherence__LimeExplainer__Rouge-l__en_train_3.pdf › experiment_graphs_pdf_stratification/SummEval-coherence__LimeExplainer__Rouge-l__en_train_3.pdf]

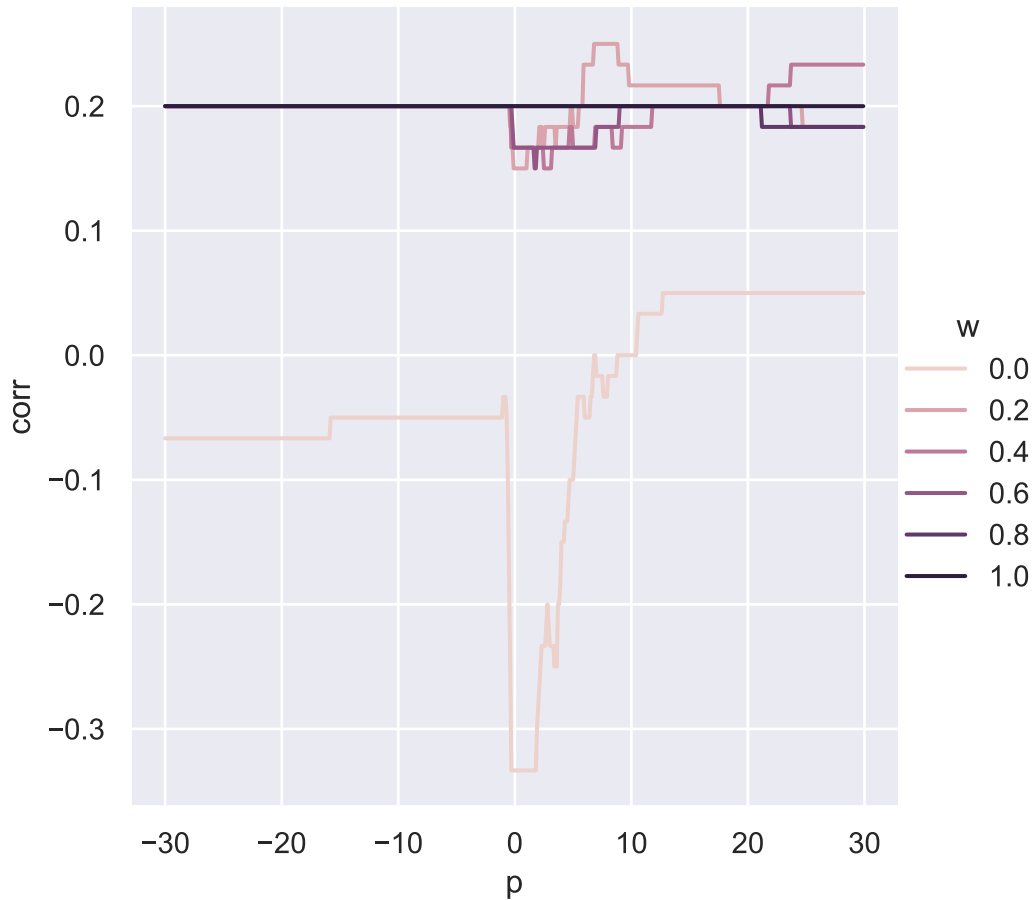

Supplement: note [file SummEval-coherence__LimeExplainer__Rouge-l__en_train_4.pdf › experiment_graphs_pdf_stratification/SummEval-coherence__LimeExplainer__Rouge-l__en_train_4.pdf]

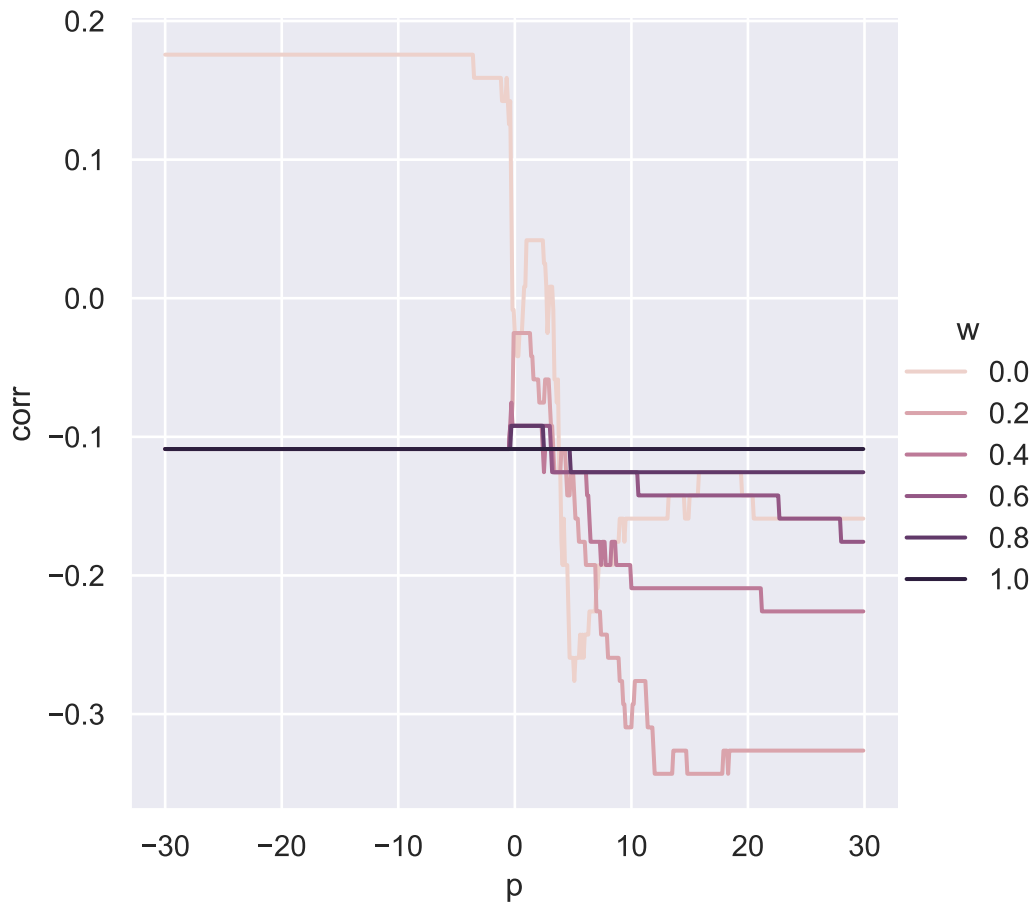

Supplement: note [file SummEval-coherence__LimeExplainer__Rouge-l__en_train_5.pdf › experiment_graphs_pdf_stratification/SummEval-coherence__LimeExplainer__Rouge-l__en_train_5.pdf]

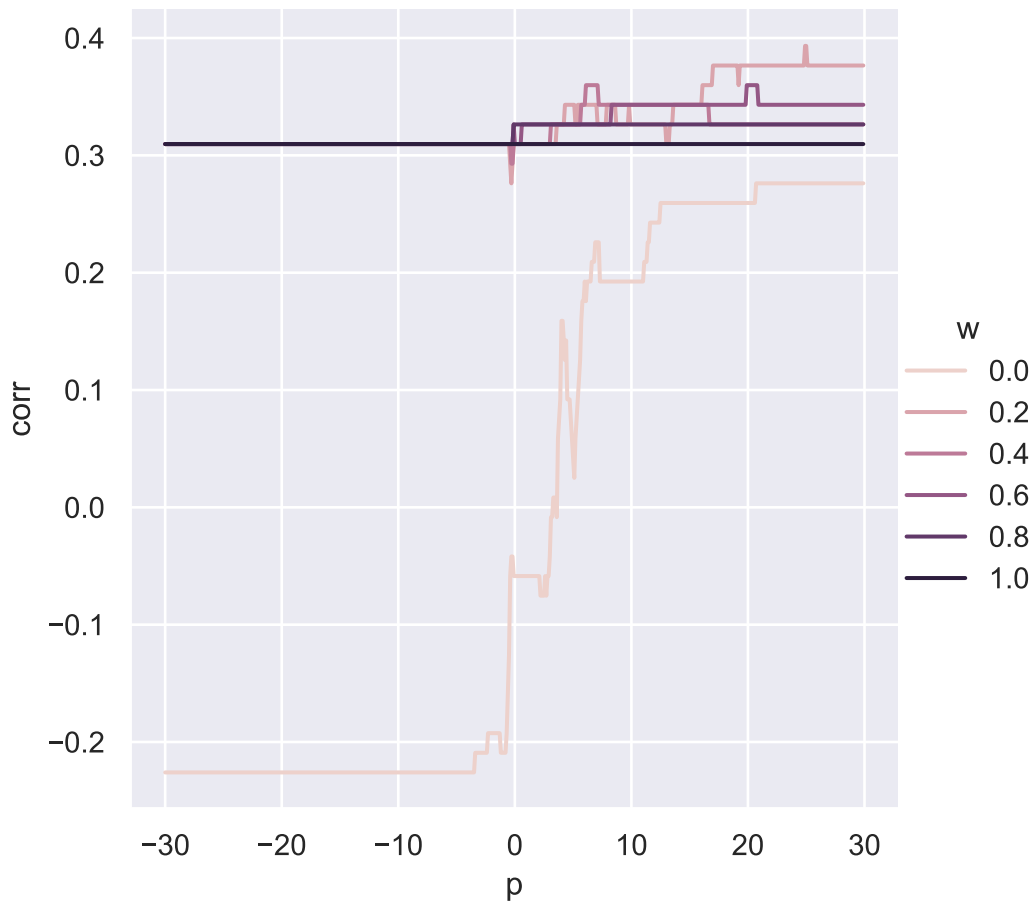

Supplement: note [file SummEval-coherence__LimeExplainer__Rouge-l__en_train_6.pdf › experiment_graphs_pdf_stratification/SummEval-coherence__LimeExplainer__Rouge-l__en_train_6.pdf]
