# Supplementary material (part 3 of 3)
Source: ML conference proceedings conference paper supplement (https://aclanthology.org/2024.findings-eacl.150)

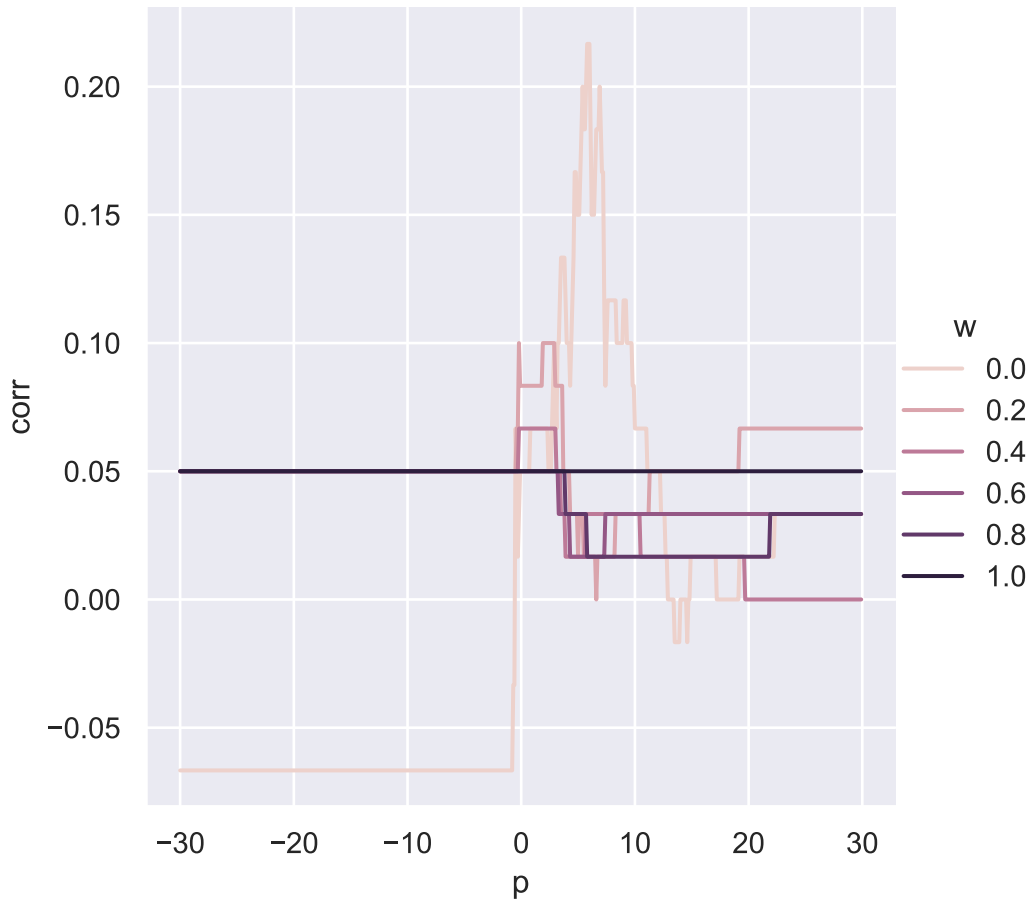

Supplement: note [file SummEval-coherence__LimeExplainer__Rouge-l__en_train_7.pdf › experiment_graphs_pdf_stratification/SummEval-coherence__LimeExplainer__Rouge-l__en_train_7.pdf]
